# Supplementary material for: A Low-Power MEMS IDE Capacitor with Integrated Microhotplate: Application as Methanol Sensor using a Metal-Organic Framework Coating as Affinity Layer
Source: Sensors (Basel). 2019 Feb 20;19(4):888. doi: 10.3390/s19040888 (PMC6412504; doi:10.3390/s19040888)
Supplement: Supplementary file 1 [file sensors-19-00888-s001.zip]

Archive with 32 entries (32 files):
- chicago2.bst
- Images/Fig_S1.pdf
- Images/Fig_S10.pdf
- Images/Fig_S11.pdf
- Images/Fig_S12.pdf
- Images/Fig_S13.pdf
- Images/Fig_S14.pdf
- Images/Fig_S15.pdf
- Images/Fig_S16.pdf
- Images/Fig_S17.pdf
- Images/Fig_S18.pdf
- Images/Fig_S19.pdf
- Images/Fig_S2.pdf
- Images/Fig_S20.pdf
- Images/Fig_S21.pdf
- Images/Fig_S22.pdf
- Images/Fig_S23.pdf
- Images/Fig_S3.pdf
- Images/Fig_S4.pdf
- Images/Fig_S5.pdf
- Images/Fig_S6.pdf
- Images/Fig_S7.pdf
- Images/Fig_S8.pdf
- Images/Fig_S9.pdf
- logo-ccby.eps
- logo-mdpi.eps
- logo-updates.pdf
- mdpi.bst
- mdpi.cls
- MDPI_Sensors_425899_Supplementary.pdf
- References.bib
- template.tex
