# Supplementary material for: A Low-Power MEMS IDE Capacitor with Integrated Microhotplate: Application as Methanol Sensor using a Metal-Organic Framework Coating as Affinity Layer
Source: Sensors (Basel). 2019 Feb 20;19(4):888. doi: 10.3390/s19040888 (PMC6412504; doi:10.3390/s19040888)
Supplement: Supplementary file 1 [file sensors-19-00888-s001.zip › References.bib]

@article{silvestri2016thermal,
  title={Thermal characterization of carbon nanotube foam using MEMS microhotplates and thermographic analysis},
  author={Silvestri, Cinzia and Riccio, Michele and Poelma, Ren{\'e} H and Morana, Bruno and Vollebregt, Sten and Santagata, Fabio and Irace, Andrea and Zhang, Guo Qi and Sarro, Pasqualina M},
  journal={Nanoscale},
  volume={8},
  number={15},
  pages={8266--8275},
  year={2016},
  publisher={Royal Society of Chemistry}
}


@misc{comsol_res,
     title = {{Example—Resistive Heating, COMSOL Multiphysics}},
     howpublished = {\url{https://www.comsol.com/forum/thread/attachment/65707/resistive_heating_sbs-10665.pdf}}
}

@misc{comsol_res_2,
     title = {{Heating Circuit, COMSOL Multiphysics}},
     howpublished = {\url{https://www.comsol.com/model/download/468651/models.sme.heating_circuit.pdf}}
}

@book{bergman2011fundamentals,
  title={Fundamentals of heat and mass transfer},
  author={Bergman, Theodore L and Incropera, Frank P and DeWitt, David P and Lavine, Adrienne S},
  year={2011},
  publisher={John Wiley \& Sons}
}


@inproceedings{silvestri2014electro,
  title={Electro-thermal simulation and characterization of vertically aligned CNTs directly grown on a suspended microhoplate for thermal management applications},
  author={Silvestri, C and Picciafoco, P and Morana, B and Santagata, F and Zhang, GQ and Sarro, PM},
  booktitle={\textit{IEEE Sensors}},
  pages={827--830},
  year={2014},
}

@article{pike1997thermal,
  title={Thermal modelling and characterisation of micropower chemoresistive silicon sensors},
  author={Pike, Andrew and Gardner, Julian W},
  journal={Sensors and Actuators B: Chemical},
  volume={45},
  number={1},
  pages={19--26},
  year={1997},
  publisher={Elsevier}
}


@book{madou2002fundamentals,
  title={Fundamentals of Microfabrication: The Science of Miniaturization, Second Edition},
  author={Madou, M.J.},
  isbn={9780849308260},
  lccn={20043273},
  url={https://books.google.nl/books?id=9bk3gJeQKBYC},
  year={2002},
  publisher={Taylor \& Francis}
}


@article{cravillon2011controlling,
  title={Controlling zeolitic imidazolate framework nano-and microcrystal formation: insight into crystal growth by time-resolved in situ static light scattering},
  author={Cravillon, Janosch and Nayuk, Roman and Springer, Sergej and Feldhoff, Armin and Huber, Klaus and Wiebcke, Michael},
  journal={Chemistry of Materials},
  volume={23},
  number={8},
  pages={2130--2141},
  year={2011},
  publisher={ACS Publications}
}

@inproceedings{venkatesh2016electro,
  title={Electro-thermal analysis and design of a combined MEMS impedance and micro hotplate device for gas sensing applications},
  author={Venkatesh, MR and El Mansouri, B and Wei, J and Bossche, A and Zhang, GQ},
  booktitle={Thermal, Mechanical and Multi-Physics Simulation and Experiments in Microelectronics and Microsystems (EuroSimE), 2016 17th International Conference on},
  pages={1--9},
  year={2016},
  organization={IEEE}
}

@article{mamishev2004interdigital,
  title={Interdigital sensors and transducers},
  author={Mamishev, Alexander V and Sundara-Rajan, Kishore and Yang, Fumin and Du, Yanqing and Zahn, Markus},
  journal={Proceedings of the IEEE},
  volume={92},
  number={5},
  pages={808--845},
  year={2004},
  publisher={IEEE}
}


@article{oberlander2015study,
  title={Study of interdigitated electrode arrays using experiments and finite element models for the evaluation of sterilization processes},
  author={Oberl{\"a}nder, Jan and Jildeh, Zaid B and Kirchner, Patrick and Wendeler, Luisa and Bromm, Alexander and Iken, Heiko and Wagner, Patrick and Keusgen, Michael and Sch{\"o}ning, Michael J},
  journal={Sensors},
  volume={15},
  number={10},
  pages={26115--26127},
  year={2015},
  publisher={Multidisciplinary Digital Publishing Institute}
}
