# Supplementary material for: A Low-Power MEMS IDE Capacitor with Integrated Microhotplate: Application as Methanol Sensor using a Metal-Organic Framework Coating as Affinity Layer
Source: Sensors (Basel). 2019 Feb 20;19(4):888. doi: 10.3390/s19040888 (PMC6412504; doi:10.3390/s19040888)
Supplement: Supplementary file 1 [file sensors-19-00888-s001.zip › template.tex]

%  LaTeX support: latex@mdpi.com 
%  In case you need support, please attach all files that are necessary for compiling as well as the log file, and specify the details of your LaTeX setup (which operating system and LaTeX version / tools you are using).

% You need to save the "mdpi.cls" and "mdpi.bst" files into the same folder as this template file.

%=================================================================
\documentclass[sensors,supfile,submit,moreauthors,pdftex,10pt,a4paper]{mdpi} 

% If you would like to post an early version of this manuscript as a preprint, you may use preprint as the journal and change 'submit' to 'accept'. The document class line would be, e.g. \documentclass[preprints,article,accept,moreauthors,pdftex,10pt,a4paper]{mdpi}. This is especially recommended for submission to arXiv, where line numbers should be removed before posting. For preprints.org, the editorial staff will make this change immediately prior to posting.

%
%--------------------
% Class Options:
%--------------------
% journal
%----------
% Choose between the following MDPI journals:
% actuators, addictions, admsci, aerospace, agriculture, agronomy, algorithms, animals, antibiotics, antibodies, antioxidants, applsci, arts, asi, atmosphere, atoms, axioms, batteries, bdcc, behavsci, beverages, bioengineering, biology, biomedicines, biomimetics, biomolecules, biosensors, brainsci, buildings, carbon, cancers, catalysts, cells, ceramics, challenges, chemengineering, chemosensors, children, chromatography, cleantechnol, climate, coatings, colloids, computation, computers, condensedmatter, cosmetics, cryptography, crystals, cybersecurity, data, dentistry, designs, diagnostics, diseases, diversity, econometrics, economies, education, electrochem, electrochemistry, electronics, energies, entropy, environments, epigenomes, est, fermentation, fibers, fire, fishes, fluids, foods, forecasting, forests, fractalfract, futureinternet, galaxies, games, gastrointestdisord, gels, genealogy, genes, geosciences, geriatrics, hazardousmatters, healthcare, heritage, highthroughput, horticulturae, humanities, hydrology, informatics, information, infrastructures, inorganics, insects, instruments, ijerph, ijfs, ijms, ijgi, ijtpp, inventions, j, jcdd, jcm, jcs, jdb, jfb, jfmk, jimaging, jof, jintelligence, jlpea, jmmp, jmse, joitmc, jpm, jrfm, jsan, land, languages, laws, life, literature, logistics, lubricants, machines, magnetochemistry, make, marinedrugs, materials, mathematics, mca, mti, medsci, medicina, medicines, membranes, metabolites, metals, microarrays, micromachines, microorganisms, minerals, modelling, molbank, molecules, mps, nanomaterials, ncrna, neonatalscreening, neuroglia, nitrogen, nutrients, ohbm, particles, pathogens, pharmaceuticals, pharmaceutics, pharmacy, philosophies, photonics, plants, plasma, polymers, polysaccharides, preprints, proceedings, processes, proteomes, publications, quaternary, qubs, reactions, reactions, recycling, religions, remotesensing, reports, resources, risks, robotics, safety, scipharm, sensors, separations, sexes, sinusitis, socsci, societies, soilsystems, sports, standards, stats, surfaces, surgeries, sustainability, symmetry, systems, technologies, toxics, toxins, tropicalmed, universe, urbansci, vaccines, vehicles, vetsci, vibration, viruses, vision, water, wem
%---------
% article
%---------
% The default type of manuscript is article, but can be replaced by: 
% abstract, addendum, article, benchmark, book, bookreview, briefreport, casereport, changes, comment, commentary, communication, conceptpaper, correction, conferenceproceedings, conferencereport, expressionofconcern, meetingreport, creative, datadescriptor, discussion, editorial, essay, erratum, hypothesis, interestingimages, letter, meetingreport, newbookreceived, opinion, obituary, projectreport, reply, reprint, retraction, review, perspective, protocol, shortnote, supfile, technicalnote, viewpoint
% supfile = supplementary materials
% protocol: If you are preparing a "Protocol" paper, please refer to http://www.mdpi.com/journal/mps/instructions for details on its expected structure and content.
%----------
% submit
%----------
% The class option "submit" will be changed to "accept" by the Editorial Office when the paper is accepted. This will only make changes to the frontpage (e.g. the logo of the journal will get visible), the headings, and the copyright information. Also, line numbering will be removed. Journal info and pagination for accepted papers will also be assigned by the Editorial Office.
%------------------
% moreauthors
%------------------
% If there is only one author the class option oneauthor should be used. Otherwise use the class option moreauthors.
%---------
% pdftex
%---------
% The option pdftex is for use with pdfLaTeX. If eps figures are used, remove the option pdftex and use LaTeX and dvi2pdf.

%=================================================================
\firstpage{1} 
\makeatletter 
\setcounter{page}{\@firstpage} 
\makeatother
\pubvolume{xx}
\issuenum{1}
\articlenumber{1}
\pubyear{2018}
\copyrightyear{2018}
%\externaleditor{Academic Editor: name}
\history{Received: date; Accepted: date; Published: date}

%\updates{yes} % If there is an update available, un-comment this line
 
%------------------------------------------------------------------
% The following line should be uncommented if the LaTeX file is uploaded to arXiv.org
%\pdfoutput=1

%=================================================================
% Add packages and commands here. The following packages are loaded in our class file: fontenc, calc, indentfirst, fancyhdr, graphicx, lastpage, ifthen, lineno, float, amsmath, setspace, enumitem, mathpazo, booktabs, titlesec, etoolbox, amsthm, hyphenat, natbib, hyperref, footmisc, geometry, caption, url, mdframed, tabto, soul, multirow, microtype, tikz, siunitx

%=================================================================
%% Please use the following mathematics environments: Theorem, Lemma, Corollary, Proposition, Characterization, Property, Problem, Example, ExamplesandDefinitions, Hypothesis, Remark, Definition
%% For proofs, please use the proof environment (the amsthm package is loaded by the MDPI class).

%=================================================================
% Full title of the paper (Capitalized)
% \Title{Title}

\Title{A low-power MEMS IDE Capacitor with Integrated Microhotplate: Application as Methanol Sensor using a Metal Organic Framework Coating as Affinity Layer}

% Author Orchid ID: enter ID or remove command
% \newcommand{\orcidauthorA}{0000-0000-000-000X} % Add \orcidA{} behind the author's name
% %\newcommand{\orcidauthorB}{0000-0000-000-000X} % Add \orcidB{} behind the author's name
% \newcommand{\orcidauthorA}{0000-0000-000-000X}
% \newcommand{\orcidauthorA}{0000-0000-000-000X}
% \newcommand{\orcidauthorA}{0000-0000-000-000X}
% {0000-0001-5513-4880}
% {0000-0001-7252-4047}
% {0000-0003-3296-953X}

% Authors, for the paper (add full first names)
% \Author{Firstname Lastname $^{1,\dagger,\ddagger}$\orcidA{}, Firstname Lastname $^{1,\ddagger}$ and Firstname Lastname $^{2,}$*}

\Author{Manjunath R Venkatesh , Sumit Sachdeva , Brahim El Mansouri , Jia Wei, Andre Bossche, Duco Bosma, Louis C.P.M. de Smet, Ernst J.R. Sudhölter and Guo.Qi. Zhang}

% Authors, for metadata in PDF
\AuthorNames{Firstname Lastname, Firstname Lastname and Firstname Lastname}

% Affiliations / Addresses (Add [1] after \address if there is only one affiliation.)
% \address{%
% $^{1}$ \quad Affiliation 1; e-mail@e-mail.com\\
% $^{2}$ \quad Affiliation 2; e-mail@e-mail.com}

\address{%
$^{1}$ \quad Delft University of Technology, Beijing Research Centre, Mekelweg 4, 2628 CD, Delft, The Netherlands; m.ramachandrappavenkatesh@tudelft.nl (M.R.V)\\
$^{2}$ \quad Department of Chemical Engineering, Delft University of Technology, Van der Maasweg 9, 2629 HZ, Delft, The Netherlands; s.sachdeva@tudelft.nl (S.S); d.bosma@tudelft.nl (D.B); e.j.r.sudholter@tudelft.nl (E.J.R.S)\\
$^{3}$ \quad Department of Microelectronics,Delft University of Technology, Van der Maasweg 9, 2629 HZ, Delft, The Netherlands; B.ElMansouri@tudelft.nl (B.M); J.Wei@tudelft.nl (J.W); A.Bossche@tudelft.nl (A.B); g.q.zhang@tudelft.nl (G.Q.Z) \\
$^{4}$ \quad Laboratory of Organic Chemistry, Wageningen University \& Research, Stippeneng 4, 6708 WE, Wageningen, The Netherlands; louis.desmet@wur.nl (L.D.S)}


% Contact information of the corresponding author
% \corres{Correspondence: e-mail@e-mail.com; Tel.: +x-xxx-xxx-xxxx}
 \corres{Correspondence: J.wei@tudelft.nl; g.q.zhang@tudelft.nl; Tel.: +31-15-27-89495}
 
% Current address and/or shared authorship
% \firstnote{Current address: Affiliation 3} 
 \firstnote{Delft University of Technology Mekelweg 4, 2628 CD, Delft, The Netherlands} 
% The commands \thirdnote{} till \eighthnote{} are available for further notes

% Simple summary
%\simplesumm{}

% \abstract{A single paragraph of about 200 words maximum. For research articles, abstracts should give a pertinent overview of the work. We strongly encourage authors to use the following style of structured abstracts, but without headings: 1) Background: Place the question addressed in a broad context and highlight the purpose of the study; 2) Methods: Describe briefly the main methods or treatments applied; 3) Results: Summarize the article's main findings; and 4) Conclusion: Indicate the main conclusions or interpretations. The abstract should be an objective representation of the article, it must not contain results which are not presented and substantiated in the main text and should not exaggerate the main conclusions.}

% Abstract (Do not insert blank lines, i.e. \\) 

% Keywords
% \keyword{keyword 1; keyword 2; keyword 3 (list three to ten pertinent keywords specific to the article, yet reasonably common within the subject discipline.)}

%\keyword{MEMS micro-hotplate; Capacitor Interdigitated  Electrodes; ZIF-8}

% The fields PACS, MSC, and JEL may be left empty or commented out if not applicable
%\PACS{J0101}
%\MSC{}
%\JEL{}

%%%%%%%%%%%%%%%%%%%%%%%%%%%%%%%%%%%%%%%%%%
% Only for the journal Applied Sciences:
%\featuredapplication{Authors are encouraged to provide a concise description of the specific application or a potential application of the work. This section is not mandatory.}
%%%%%%%%%%%%%%%%%%%%%%%%%%%%%%%%%%%%%%%%%%

%%%%%%%%%%%%%%%%%%%%%%%%%%%%%%%%%%%%%%%%%%
% Only for the journal Data:
%\dataset{DOI number or link to the deposited data set in cases where the data set is published or set to be published separately. If the data set is submitted and will be published as a supplement to this paper in the journal Data, this field will be filled by the editors of the journal. In this case, please make sure to submit the data set as a supplement when entering your manuscript into our manuscript editorial system.}

%\datasetlicense{license under which the data set is made available (CC0, CC-BY, CC-BY-SA, CC-BY-NC, etc.)}

%%%%%%%%%%%%%%%%%%%%%%%%%%%%%%%%%%%%%%%%%%
% Only for the journal Toxins
%\keycontribution{The breakthroughs or highlights of the manuscript. Authors can write one or two sentences to describe the most important part of the paper.}

%\setcounter{secnumdepth}{4}
%%%%%%%%%%%%%%%%%%%%%%%%%%%%%%%%%%%%%%%%%%
\begin{document}
%%%%%%%%%%%%%%%%%%%%%%%%%%%%%%%%%%%%%%%%%%
%% Only for the journal Gels: Please place the Experimental Section after the Conclusions

%%%%%%%%%%%%%%%%%%%%%%%%%%%%%%%%%%%%%%%%%%
% \setcounter{section}{-1} %% Remove this when starting to work on the template.
% \section{How to Use this Template}
% The template details the sections that can be used in a manuscript. Note that the order and names of article sections may differ from the requirements of the journal (e.g. the positioning of the Materials and Methods section). Please check the instructions for authors page of the journal to verify the correct order and names. For any questions, please contact the editorial office of the journal or support@mdpi.com. For LaTeX related questions please contact Janine Daum at latex-support@mdpi.com.

%The order of the section titles is: Introduction, Materials and Methods, Results, Discussion, Conclusions for these journals: aerospace,algorithms,antibodies,antioxidants,atmosphere,axioms,biomedicines,carbon,crystals,designs,diagnostics,environments,fermentation,fluids,forests,fractalfract,informatics,information,inventions,jfmk,jrfm,lubricants,neonatalscreening,neuroglia,particles,pharmaceutics,polymers,processes,technologies,viruses,vision

%\section{Introduction}

% The introduction should briefly place the study in a broad context and highlight why it is important. It should define the purpose of the work and its significance. The current state of the research field should be reviewed carefully and key publications cited. Please highlight controversial and diverging hypotheses when necessary. Finally, briefly mention the main aim of the work and highlight the principal conclusions. As far as possible, please keep the introduction comprehensible to scientists outside your particular field of research. Citing a journal paper \cite{ref-journal}. And now citing a book reference \cite{ref-book}. Please use the command \citep{ref-journal} for the following MDPI journals, which use author-date citation: Administrative Sciences, Arts, Econometrics, Economies, Genealogy, Humanities, IJFS, JRFM, Languages, Laws, Religions, Risks, Social Sciences.


% %%%%%%%%%%%%%%%%%%%%%%%%%%%%%%%%%%%%%%%%%%
% \section{Materials and Methods}

% Materials and Methods should be described with sufficient details to allow others to replicate and build on published results. Please note that publication of your manuscript implicates that you must make all materials, data, computer code, and protocols associated with the publication available to readers. Please disclose at the submission stage any restrictions on the availability of materials or information. New methods and protocols should be described in detail while well-established methods can be briefly described and appropriately cited.

% Research manuscripts reporting large datasets that are deposited in a publicly available database should specify where the data have been deposited and provide the relevant accession numbers. If the accession numbers have not yet been obtained at the time of submission, please state that they will be provided during review. They must be provided prior to publication.

% Interventionary studies involving animals or humans, and other studies require ethical approval must list the authority that provided approval and the corresponding ethical approval code. 

% %%%%%%%%%%%%%%%% Section 1 %%%%%%%%%%%%%%%%%

\section{Structural characterization of ZIF-8 MOF}


% % %%%%%%%%%%%%%%%% Figure S1 %%%%%%%%%%%%%%%%%
\begin{figure}[H]
\centering
\includegraphics[width=14 cm]{Images/Fig_S1.pdf}
\caption {(\textbf{a}) SEM image of as-synthesized ZIF-8 at different magnifications. (\textbf{b}) Measured and simulated XRD plots.} \label{Fig_S1}
\end{figure}

% %%%%%%%%%%%%%%%%%%%%%%%%%%%%%%%%%%%%%%%%%%%%

% %%%%%%%%%%%%%%%% Section 2 %%%%%%%%%%%%%%%%%

\section{Thickness measurements of ZIF-8 MOF coated device}
Keyance Laser profilometer was used and the resulting thickness measurements along the diagonal of the device is shown in Figure \ref{Fig_S2}.

% % %%%%%%%%%%%%%%%% Figure S2 %%%%%%%%%%%%%%%%%

\begin{figure}[H]
\centering
\includegraphics[width=14 cm]{Images/Fig_S2.pdf}
\caption {Laser profilometer data plot of ZIF-8 MOF coated device. (\textbf{a}) Measured region. (\textbf{a}) 3D map of the ZIF-8 MOF coating. (\textbf{c}) Layer thickness profile.} \label{Fig_S2}
\end{figure}
% %%%%%%%%%%%%%%%%%%%%%%%%%%%%%%%%%%%%%%%%%%%%

% %%%%%%%%%%%%%%%% Section 3 %%%%%%%%%%%%%%%%%
\section{Thermal characterization of the micro-hotplate and analysis using FEM}

\subsection{\hl{Analysis of the steady-state power consumption}}

The steady-state power consumption of the bare device in nitrogen (P$_{N_2}$) and in vacuum (P$_{vacuum}$) is shown in Figure \ref{Fig_S3}.
The heat loss by different means of heat transfer of the bare device is estimated as following\cite{silvestri2016thermal}\cite{pike1997thermal},

\begin{itemize}[leftmargin=*,labelsep=5.8mm]
\item The radiative power loss is theoretically calculated for the top and bottom area of the device using Stefan-Boltzmann law given by, 
\begin{equation}
P_{rad}(T_h) = 2 * \epsilon \sigma A_h ((T^4_h - T^4_{0})) 
\end{equation}
where $\epsilon$ is the effective emissivity of the microhotplate taken as 1\cite{silvestri2016thermal}, $\sigma$ is the Stefan-Boltzmann constant given as 56.7$\cdot$ 10$^{-9}$ Wm$^{-2}$K$^{-2}$, A$_h$ is the area of the microhotplate calculated to be 5.25$\cdot$10$^{-7}$ m$^2$ , $T_{h}$ is the average temperature of the heater at a given input power and $T_{0}$ is the ambient temperature. 
The calculated radiative heat loss P$_{rad}$(T$_h$) is shown in Figure \ref{Fig_S3}. 
At a temperature of 200$^\circ$C, P$_{rad}$(T$_h$) is 2.5mW.
\item The conductive power loss through the membrane and beams of the microhotplate is determined by subtracting the radiative power loss from the power consumption of the bare device in vacuum given by,
\begin{equation}
P_{cond}(T_h) =  P_{vacuum}(T_h) - P_{rad}(T_h)
\end{equation}
At a temperature of 200$^\circ$C the obtained conductive power loss P$_{cond}$(T) is 6.8mW.
\item The convective power loss P$_{conv}(T_h)$ (Figure \ref{Fig_S3}) due to nitrogen flow is obtained by subtracting the power consumption of the device in nitrogen with power consumption in vacuum given by ,
\begin{equation}
P_{conv}(T_h) =  P_{N_2}(T_h) - P_{vacuum}(T_h)
\end{equation}
The obtained convective power loss P$_{conv}(T_h)$ at 200$^\circ$C is 16.5mW. Considering the convective power P$_{conv}(T_h)$, the convection coefficient \textit{h}$_{conv}(T_h)$ is extracted using the following equation\cite{silvestri2016thermal},
\begin{equation}
h_{conv}(T_h) =  \frac{P_{conv}(T_h)}{A_h (T_h - T_{0})}
\end{equation}

\end{itemize}


% % %%%%%%%%%%%%%%%% Figure S3 %%%%%%%%%%%%%%%%%
\begin{figure}[H]
\centering
\includegraphics[width=10 cm]{Images/Fig_S3.pdf}
\caption {Power consumption in bare device.} \label{Fig_S3}
\end{figure}
% %%%%%%%%%%%%%%%%%%%%%%%%%%%%%%%%%%%%%%%%%%%%

For the bare device an input power of 3.5mW and 25.8mW is required to obtain a temperature of 50$^\circ$C and 200$^\circ$C in nitrogen respectively. 
The obtained power loss due to convection is 64\%, 26\% due to conduction and 10\% is due to radiation. 
Hence, heat loss due to convection is the significant component that inhibits low power operation for a long duration. 

% % %%%%%%%%%%%%%%%% Figure S4 %%%%%%%%%%%%%%%%%
\begin{figure}[H]
\centering
\includegraphics[width=14 cm]{Images/Fig_S4.pdf}
\caption{Thermal analysis (\textbf{a}) Heat transfer mechanisms in the device.  (\textbf{b}) 3D geometry for the FEM model with thickness of the materials. (\textbf{c}) Micro-hotplate device design.} \label{Fig_S4}
\end{figure}
% %%%%%%%%%%%%%%%%%%%%%%%%%%%%%%%%%%%%%%%%%%%%

\subsection{Thermal Analysis using FEM}

The heat generated in the micro-hotplate is transferred by three methods namely: 1) conduction through the beams of the device, 2) convection through the top and bottom of the device and 3) radiation as shown in Figure \ref{Fig_S4}a.


A 3D geometry of the device is developed in COMSOL Multiphysics\textsuperscript{\small{\textregistered}} 5.3 (Figure \ref{Fig_S4}b). 
In this 3D model, the electro-thermal analysis is performed by coupling the electrical domain to the thermal domain. 
The conjugate heat transfer physics is selected for the entire domain, whereas the electric current physics module is only selected for the TiN micro-hotplate with boundary conditions for current input at terminal 1(\textit{I$_{in}$}) and ground terminal 2 (GND). The voltage output is measured at terminal 3 (\textit{V$_{high}$}) and terminal 4 (\textit{V$_{low}$}) enabling a four-probe IV measurement configuration.

The heat generated due to joule heating is proportional to the current density given by \cite{comsol_res}\cite{comsol_res_2}, 

\begin{equation}
Q  \propto |J|^2
\end{equation}

\begin{equation}
Q =\frac{|J|^2}{\sigma (T)} 
\end{equation}\label{eqn_2}

where $\sigma$(T) is the electrical conductivity, T is the temperature and J is the current density. 
The electrical conductivity is a function of temperature given by, 

\begin{equation}
\sigma (T) = \frac{1}{\rho_0(1+\alpha(T-T_0))} 
\end{equation}

where $\rho_{0}$ is the electrical conductivity at room temperature (\textit{T$_{0}$}) and $\alpha$ is the temperature co-efficient of resistance (TCR). 
The value of TCR of the device used for measurement is $\alpha$ = 0.000725$^\circ$C$^{-1}$.

The current density is proportional to the electric field E, which is the negative gradient of potential V. Using this in Equation \ref{eqn_2}, we get,  

\begin{equation}
Q =\frac{|J|^2}{\sigma (T)} = \frac{|\sigma (T)E|^2}{\sigma (T)} = \sigma (T)|\nabla V|^2
\end{equation}


The governing equations for the steady-state heat conduction for joule heating process are described below\cite{silvestri2014electro}, 

\begin{equation}
\nabla  \cdot( k(T) \nabla T) + \frac{(J^2)}{\sigma (T)}  = 0
\end{equation}

where \textit{k(T)} is the respective thermal conductivity of silicon-nitride membrane, isolation layer, TiN and aluminum electrodes. The material parameters for the FEM model is described in Table \ref{Table_1}.

\begin{table}[H]
\caption{Summary of material parameters for FEM analysis.}
\label{Table_1}
\centering
%% \tablesize{} %% You can specify the fontsize here, e.g.  \tablesize{\footnotesize}. If commented out \small will be used.
\begin{tabular}{cccc}
\toprule
\textbf{Material}	& \textbf{Thermal Conductivity (k) W/mK} & \textbf{Density Kg/m3} & \textbf{Heat Capacity (Cp) J/kgK}	\\
\midrule
LPCVD silicon nitride\cite{madou2002fundamentals}       & 10-13      & 3200     & 700\\
PECVD silicon nitride\cite{madou2002fundamentals}       & 2-4.5      & 2800     & 700\\
Silicon\cite{madou2002fundamentals}                     & 157        & 2320     & 700\\
TiN\cite{madou2002fundamentals}                         & 19.2       & 5220     & 600\\
Al\cite{madou2002fundamentals}                          & 236        & 2700     & 900\\
ZIF-8\cite{cravillon2011controlling}                       & 0.326      & 950      & 700\\
\bottomrule
\end{tabular}
\end{table}

The generated heat transferred through the beams of the micro-hotplate is computed based on the thermal conductivity of the layers.
The radiative heat flux is defined on the entire surface with an effective emissivity ($\epsilon$) of silicon nitride layers equal to 1 \cite{silvestri2014electro}.
The convective heat transfer coefficient is defined on the entire device with \textit{h$_{conv}$(T)} determined from the measured results. 
Using these conditions and design parameters shown in Table \ref{Table_1}, the thermal modeling of the device is done.
In the 3D model, the boundary condition for the silicon substrate is fixed at a temperature of 20$^\circ$C.
The current (I$_{in}$) is swept from 100$\mu$A to 5mA for the thermal analysis of the device in vacuum and up to 10mA for the device under convective conditions. 
 
\begin{table}[H]
\caption{Summary of design parameters for FEM analysis.}
\label{Table_2}
\centering
%% \tablesize{} %% You can specify the fontsize here, e.g.  \tablesize{\footnotesize}. If commented out \small will be used.
\begin{tabular}{ccc}
\toprule
\textbf{Design Parameter}	& \textbf{Value} & \textbf{Unit} \\
\midrule
Thickness of silicon nitride (\textit{t$_{mem}$})                 & 500      & nm \\
Diameter of membrane         (\textit{d$_{mem}$})                & 1    & mm \\
Thickness of silicon nitride isolation layer (\textit{t$_{SiNx}$}) & 1000& nm \\
Thickness of TiN electrodes    (\textit{t$_{TiN}$})              & 400      & nm \\
Thickness of Al electrodes     (\textit{t$_{Al}$})               & 1000     & nm \\
Thickness of ZIF-8 MOF     (\textit{t$_{ZIF-8}$})               & 10     & $\mu$m \\
\bottomrule
\end{tabular}
\end{table}


% %%%%%%%%%%%%%%%% Section 4 %%%%%%%%%%%%%%%%%

\section{Optical imaging}

The surface morphology of ZIF-8 MOF at different magnification at 20$^\circ$C, 50$^\circ$C, 100$^\circ$C and 300$^\circ$C is shown in Figure \ref{Fig_S5}a, \ref{Fig_S5}b, \ref{Fig_S5}c and \ref{Fig_S5}d respectively. 

% % %%%%%%%%%%%%%%%% Figure S5 %%%%%%%%%%%%%%%%%
\begin{figure}[H]
\centering
\includegraphics[width=14 cm]{Images/Fig_S5.pdf}
\caption {Optical Images of ZIF-8 coated device (a) 20$^\circ$C (b) 50$^\circ$C (c) 100$^\circ$C (d) 300$^\circ$C.} \label{Fig_S5}
\end{figure}

% %%%%%%%%%%%%%%%%%%%%%%%%%%%%%%%%%%%%%%%%%%%%

% %%%%%%%%%%%%%%%% Section 5 %%%%%%%%%%%%%%%%%
\section{Methanol sensing study}

The sensing measurements for increasing methanol concentration from 500ppm to 7000ppm with baseline drift calibration line is shown in Figure \ref{Fig_S6}a. 
After the baseline drift calibration is done, the data for sensing response towards methanol is shown in Figure \ref{Fig_S6}b.

% % %%%%%%%%%%%%%%%% Figure S6 %%%%%%%%%%%%%%%%%
\begin{figure}[H]
\centering
\includegraphics[width=14 cm]{Images/Fig_S6.pdf}
\caption{(\textbf{a}) Capacitive response for increasing methanol concentration.  (\textbf{b}) Capacitive response after baseline drift calibration.} \label{Fig_S6}
\end{figure}

% %%%%%%%%%%%%%%%%%%%%%%%%%%%%%%%%%%%%%%%%%%%%

The baseline capacitance measurement for ZIF-8 coated device in nitrogen is shown in \ref{Fig_S7}.

% % %%%%%%%%%%%%%%%% Figure S7 %%%%%%%%%%%%%%%%%
\begin{figure}[H]
\centering
\includegraphics[width=10 cm]{Images/Fig_S8.pdf}
\caption {Measured baseline capacitance of ZIF-8 coated device in nitrogen at 20$^\circ$C.} \label{Fig_S7}
\end{figure}

% %%%%%%%%%%%%%%%%%%%%%%%%%%%%%%%%%%%%%%%%%%%%

The reversibility study for exposure to methanol concentration of 5000ppm with baseline drift calibration line is shown in Figure \ref{Fig_S8}a. 
The response after the baseline drift calibration is shown in Figure \ref{Fig_S8}b.

% % %%%%%%%%%%%%%%%% Figure S8 %%%%%%%%%%%%%%%%%

\begin{figure}[H]
\centering
\includegraphics[width=14 cm]{Images/Fig_S7.pdf}
\caption{(\textbf{a}) Capacitive response for 5000ppm of methanol with baseline drift fitting. (\textbf{b}) Capacitive response after baseline drift calibration.} \label{Fig_S8}
\end{figure}

% %%%%%%%%%%%%%%%%%%%%%%%%%%%%%%%%%%%%%%%%%%
% %%%%%%%%%%%%%%%% Section 5 %%%%%%%%%%%%%%%%%

\section{Temperature-dependent capacitance characterization of the bare device}\label{3_3}
In this section, the changes in the capacitance of the bare device with temperature due to the SiN$_x$ isolation layer is characterized. 


Before the measurement of the capacitance of the bare device, two preconditioning steps in vacuum were performed. 
In the first step, the entire gas chamber with the MEMS device was heated in an oven at 100$^\circ$C for 1hr and cooled to room temperature.
In the second step, the operating temperature of the device was increased to 200$^\circ$C for 30 minutes using the microhotplate and cooled to ambient temperature of 20$^\circ$C for one hour. 
These steps were done to remove moisture content that could be present on top of the IDEs while placing the device in the chamber. 
The capacitance was measured at a constant oscillation voltage of 1V, and at a frequency of 10kHz. 
The measured capacitance of the bare device after the preconditioning steps was 6.969 pF. 

Next, a sequence of temperature steps was programmed using the Keithley 2611B by changing the current through the microhotplate, and the capacitance measured simultaneously as shown in Figure \ref{Fig_S9}.
From the measurement data, it is evident that during the temperature steps, there is a change in the capacitance of the bare device.
The changes in the capacitance for the temperature steps to 55$^\circ$C and 120$^\circ$C is a combination of two behaviors, (i) a sharp increase in $\Delta$C could be due to the change in dielectric constant ($\epsilon_r$) of the PECVD SiN$_x$ isolation layer with increasing temperature, (ii) a slow decay in the capacitance of the device caused by the desorption of residual moisture adsorbed on the top of the IDEs from the chamber surrounding.
This can be due to the fact that the vacuum could not be high enough to remove the moisture present in the chamber.
For the next temperature steps to 165$^\circ$C and 220$^\circ$C, the measured change in capacitance ($\Delta$C) increases and remains almost constant during the temperature cycle.
At these high temperatures, the water molecules are not adsorbed on the IDEs, and thus the slow decay is not observed.

% % %%%%%%%%%%%%%%%% Figure S9 %%%%%%%%%%%%%%%%%
\begin{figure}[H]
\centering
\includegraphics[width=10 cm]{Images/Fig_S9.pdf}
\caption {Capacitance of bare device with temperature steps in vacuum.} \label{Fig_S9}
\end{figure}
% %%%%%%%%%%%%%%%%%%%%%%%%%%%%%%%%%%%%%%%%%%


In order to accurately determine the observed changes in the bare device capacitance with temperature (behavior (i) and (ii)), the following two experiments were performed,

\begin{enumerate}[leftmargin=*,labelsep=5.8mm]
\item 
The sharp increase in capacitance (behavior (i)) and the slow decay (behavior (ii)) can be decoupled by changing the temperature of the microhotplate between two temperature points rapidly.
In this experiment, the current through the microhotplate is changed per second to obtain two temperature points (fast temperature steps). 
The capacitance is measured simultaneously at a frequency of 10kHz and oscillation voltage of 1V. 
The measured capacitance for the fast temperature steps is described in Figure \ref{Fig_S10}a.
The temperature of the microhotplate is changed between 30$^\circ$C to 55$^\circ$C, 55$^\circ$C to 115$^\circ$C, 115$^\circ$C to 160$^\circ$C and 160$^\circ$C to 215$^\circ$C.
Figure \ref{Fig_S10}c shows the temperature steps between 55$^\circ$C to 115$^\circ$C with the capacitance of the bare device changing from 6.956pF to 6.968pF. The difference in capacitance $\Delta$C of the bare device for the corresponding temperature steps is shown in Figure \ref{Fig_S10}b. 
The resulting average changes in capacitance $\Delta$C for the fast temperature
steps is shown in Figure \ref{Fig_S10}d.
It is seen that upon increasing the temperature from 30$^\circ$C to 220$^\circ$C, the $\Delta$C of the bare device increases linearly. 
This change in capacitance is due to the change in the dielectric constant of PECVD SiN$_x$ layer, which needs to be considered as a calibration factor during temperature cycle measurements.
It is seen that even during the fast temperature steps, there is an inherent change in the capacitance of the bare device. 
The resulting change in the bare device capacitance ($\Delta$C) obtained from the single temperature step and fast temperature steps is shown in Figure \ref{Fig_S11}. 
The change in capacitance $\Delta$C is found to be linear with increasing temperatures.
The $\Delta$C obtained from the linear fit at a temperature of 50$^\circ$C is 7.5fF, and at 200$^\circ$C it is 38 fF. 

\begin{figure}[H]
\centering
\includegraphics[width=16 cm]{Images/Fig_S10.pdf}
\caption{(\textbf{a}) Capacitance of the bare device with fast temperature steps in vacuum. (\textbf{b}) Capacitance change $\Delta$C in vacuum of the bare device by fast temperature steps. (\textbf{c}) Capacitance change $\Delta$C during temperature steps from 55$^\circ$C to 115$^\circ$C. (\textbf{d}) $\Delta$C versus temperature of the bare device in vacuum during fast temperature steps.}
\label{Fig_S10}
\end{figure}

\begin{figure}[H]
\centering
\includegraphics[width=10 cm]{Images/Fig_S11.pdf}
\caption {Comparison $\Delta$C versus temperature of the bare device in vaccum for single and fast temperature steps.} \label{Fig_S11}
\end{figure}

\item 
The change in capacitance purely due to the dielectric constant variation (behavior (i)) can be determined by characterizing a metal-insulator-metal (MIM) capacitor structure.
In this experiment, a MIM capacitor with 200nm PECVD SiN$_x$ as the dielectric layer is fabricated and characterized. 
The fabrication flowchart of the MIM capacitor with PECVD silicon nitride as the dielectric layer is shown in Figure \ref{Fig_S12}. 
A standard 4-inch p-type silicon wafer was used as the substrate for the device. 
A metal layer of 1$\mu$m aluminum was deposited using a Trikon Sigma sputter coater. 
A layer of 200nm thick PECVD silicon nitride was deposited using Novellus PECVD equipment. 
The contact opening mask layer was exposed to etch silicon nitride to obtain the contact to the bottom aluminum layer.
For the top electrode, an aluminum metal layer of 1.4$\mu$m was deposited on top of the PECVD silicon nitride. 

The capacitance of the MIM capacitor with PECVD SiN$_x$ is given by,
\begin{equation}
C_{SiN_x} =  \epsilon_0 \cdot \epsilon_r  \cdot \frac{A_{cap}}{d_{cap}}
\end{equation}

where, $\epsilon_0$ is the permittivity of free space, $\epsilon_r$ is the dielectric constant of PECVD SiN$_x$, A$_{cap}$ is the area of the MIM capacitor and d$_{cap}$ is the thickness of the SiN$_x$ layer.
The temperature steps were done using the thermochuck temperature controller from 20$^\circ$C to 200$^\circ$C. 
The capacitance was measured as a function of frequency from 1kHz to 100kHz for different temperatures as shown in Figure \ref{Fig_S13}.
The measured capacitance and the extracted dielectric constant for different temperatures at a frequency of 10kHz and oscillation voltage of 1V is shown in Figure \ref{Fig_S14}.
The capacitance of the MIM capacitor increases with increasing temperatures due to the increase in the dielectric constant of the PECVD SiN$_x$ layer. 
The measured capacitance C$_{SiN_x}$ is 227.78 pF at 20$^\circ$C and C$_{SiN_x}$ = 230.12 pF at 200$^\circ$C.
The extracted dielectric constant ($\epsilon_r$) increases from 6.554 at 20$^\circ$C to 6.621 at 200$^\circ$C. 


\begin{figure}[H]
\centering
\includegraphics[width=14 cm]{Images/Fig_S12.pdf}
\caption{Fabrication process flowchart MIM capacitor (\textbf{a}) Silicon substrate. (\textbf{b}) 1$\mu$m Al 1\%Si for bottom metal. (\textbf{c}) 200nm PECVD Silicon nitride. (\textbf{d}) Bottom electrode contact opening and silicon nitride etching. (\textbf{e}) 1$\mu$m Al/1\%Si for top metal. (\textbf{f}) Schematic representation of MIM capacitor C$_{SiN_x}$.}  \label{Fig_S12}
\end{figure}

\begin{figure}[H]
\centering
\includegraphics[width=10 cm]{Images/Fig_S13.pdf}
\caption {Capacitance versus frequency of MIM capacitor at different temperatures.} \label{Fig_S13}
\end{figure}

\begin{figure}[H]
\centering
\includegraphics[width=10 cm]{Images/Fig_S14.pdf}
\caption {Dielectric constant and capacitance of MIM capacitor at different temperatures.} \label{Fig_S14}
\end{figure}
\end{enumerate}

% %%%%%%%%%%%%%%%%%%%%%%%%%%%%%%%%%%%%%%%%%%%%

% %%%%%%%%%%%%%%%% Section 7 %%%%%%%%%%%%%%%%%
\subsection{FEM analysis of IDE capacitor}

In this section, the increase in capacitance due to the temperature-dependent dielectric constant of the SiN$_x$ isolation layer is validated by developing a 2D FEM model of the IDE capacitor.

The obtained relation of $\epsilon_r$ vs temperature for the SiN$_x$ isolation layer is used to determine the total capacitance of the device and contribution of the shielded and unshielded electrodes by using a 2D FEM model.
The total capacitance between the electrodes depends on the dielectric constants of the substrate and dielectric constant of the layer above the electrodes.
Due to the design of the microhotplate electrodes, there are regions where the IDEs are not adequately shielded by the underlying microhotplate electrodes. 
For a microhotplate designed within a membrane having a diameter of 1mm, about 67\% of the area underneath the IDE is shielded by the microhotplate pattern whereas 33\% of the area under the IDEs is not shielded.
Thus, the total capacitance is obtained by the sum of two capacitances: shielded IDEs (C$_{shielded}$) and unshielded IDEs (C$_{unshielded}$).

Figure \ref{Fig_S15}b illustrates a local cross-section of the IDE and heater structure, together with a corresponding circuit model (only capacitive components are shown.). The total capacitance is given by,

\begin{equation}
C_{total} =  C_{shielded} + C_{unshielded} 
\end{equation}
where, 
\begin{equation}
C_{shielded} \hspace{2mm} \text{and} \hspace{2mm}  C_{unshielded}  = C_{IDE} + C_{parasitic}
\end{equation}

The parasitic capacitance contributing to the shielded IDEs is mainly due to the isolation layer capacitance (C$_{1s}$). 
However, the parasitic capacitances for the unshielded IDEs are due to the isolation layer capacitance (C$_{1}$), membrane layer capacitance (C$_{2}$), and capacitance through the space underneath the membrane (C$_{3}$) as described in Figure \ref{Fig_S15}a. 

\begin{figure}[H]
\centering
\includegraphics[width=15 cm]{Images/Fig_S15.pdf}
\caption{FEM Modelling of IDE capacitor. (\textbf{a}) Mask layout of a circular IDE. (\textbf{b}) Cross-section view of IDE with microhotplate electrodes. (\textbf{c}) Electric field distribution of unshielded electrodes. (\textbf{b}) Electric field distribution of shielded electrodes.} \label{Fig_S15}
\end{figure}


A 2D FEM model is developed by considering the half spacial wavelength for aluminum IDE pair with SiN$_x$ membrane, TiN electrode, SiN$_x$ isolation layer (Figure \ref{Fig_S15}c and \ref{Fig_S15}d)\cite{mamishev2004interdigital}\cite{oberlander2015study}.
One electrode terminal is defined with potential V$_0$ = 1V and second electrode terminal is defined as ground.
The other sides of the 2D model are at a boundary condition of zero charge. 
The electric field for the FEM is computed by solving Gauss's law with electric potential V$_0$ as the independent variable\cite{oberlander2015study}. 
The capacitance of the IDEs in the FEM model is calculated by computing the terminal charges at the electrodes given by, 
    
\begin{equation}
C_{total} =  N \cdot \frac{Q}{V_0}
\end{equation}

where, N is the number of electrode pairs. 
The IDE dimensions based on the design parameters are W = 2$\mu$m, G = 1$\mu$m and the number of electrodes (N) is 164. 
The thickness of the isolation layer is 1$\mu$m and thickness of aluminum electrodes is 1$\mu$m.
The device capacitance is simulated at a frequency of 10kHz.
The capacitance \textit{C$_{total}$} is obtained as a function of the dielectric constant of the silicon nitride layer and the change in capacitance ($\Delta$C) for the temperature steps is calculated.
The resulting change in capacitance ($\Delta$C) of the IDE capacitor is found to be increasing linearly with temperature as shown in Figure \ref{Fig_S16}. 

\begin{figure}[H]
\centering
\includegraphics[width=10 cm]{Images/Fig_S16.pdf}
\caption{$\Delta$C versus temperature of the bare device obtained by FEM model.} \label{Fig_S16}
\end{figure}

\subsection{Capacitance Calibration}

The linear change in the capacitance of the bare device ($\Delta$C) with increasing temperatures as described in Figure \ref{Fig_S17}, is found to be mainly due to the change in the dielectric constant of PECVD SiN$_x$ isolation layer with temperature, and it is validated by the above two experiments. 
At a temperature of 200$^\circ$C, the difference between FEM data and experimental calibration of $\Delta$C is 12\% for single temperature steps, and 17\% for fast temperature steps (Figure \ref{Fig_S17}). 
The length of the electrode, the area of the shielded and unshielded electrode pair need to be more accurately determined for the 2D model.
Thus, the FEM model can be used for flexible designs of the IDE capacitor integrated with microhotplate.
The linear fit derived in this section is used as the calibration factor for temperature-dependent capacitance sensing study in Section 3.5 in the main manuscript.

\begin{figure}[H]
\centering
\includegraphics[width=10 cm]{Images/Fig_S17.pdf}
\caption{\hl{Comparison of $\Delta$C versus temperature of the bare device obtained by the calibration experiments.}} \label{Fig_S17}
\end{figure}


% %%%%%%%%%%%%%%%%%%%%%%%%%%%%%%%%%%%%%%%%%%%%

% %%%%%%%%%%%%%%%% Section 7 %%%%%%%%%%%%%%%%%
\section{Temperature-dependent methanol and water vapor sensing response}
The measured response has two calibration steps for the data analysis of temperature-dependent sensing response.
First, the measured data is calibrated with temperature-dependent isolation layer capacitance ($\Delta$C$_{SiN_x}$). 
In the second step, the baseline drift is calibrated.
The data analysis for the capacitance sensing response to exposure of methanol and water vapor at a constant concentration of 5000ppm for different temperatures is shown in Figure \ref{Fig_S18}a - \ref{Fig_S18}i and Figure \ref{Fig_S19}a - \ref{Fig_S19}i, respectively. 

\begin{figure}[H]
\centering
\includegraphics[width=18 cm]{Images/Fig_S18.pdf}
\caption{Capacitive response for exposure to methanol concentration of 5000ppm at (\textbf{a}) 30$^\circ$C (\textbf{b}) 40$^\circ$C  (\textbf{c}) 50$^\circ$C. Capacitive response after SiN$_x$ isolation layer capacitance calibration (\textbf{d}) 30$^\circ$C (\textbf{e}) 40$^\circ$C  (\textbf{f}) 50$^\circ$C.  Final Capacitive response ($\Delta$ C) after baseline drift calibration (\textbf{g}) 30$^\circ$C (\textbf{h}) 40$^\circ$C (\textbf{i}) 50$^\circ$C.} \label{Fig_S18}
\end{figure}

\begin{figure}[H]
\centering
\includegraphics[width=18 cm]{Images/Fig_S19.pdf}
\caption{Capacitive response for exposure to water vapor concentration of 5000ppm at (\textbf{a}) 30$^\circ$C (\textbf{b}) 40$^\circ$C  (\textbf{c}) 50$^\circ$C. Capacitive response after SiN$_x$ isolation layer capacitance calibration (\textbf{d}) 30$^\circ$C (\textbf{e}) 40$^\circ$C  (\textbf{f}) 50$^\circ$C.  Final Capacitive response ($\Delta$ C) after baseline drift calibration (\textbf{g}) 30$^\circ$C (\textbf{h}) 40$^\circ$C  (\textbf{i}) 50$^\circ$C.} \label{Fig_S19}
\end{figure}

% This section is not mandatory, but can be added to the manuscript if the discussion is unusually long or complex. 

% %%%%%%%%%%%%%%%% Section 11 %%%%%%%%%%%%%%%%%

\section{Stability test}

\begin{figure}[H]
\centering
\includegraphics[width=10 cm]{Images/Fig_S20.pdf}
\caption {Stability test with ZIF-8 MOF to Methanol concentration of 5000ppm.} \label{Fig_S20}
\end{figure}

\begin{figure}[H]
\centering
\includegraphics[width=10 cm]{Images/Fig_S21.pdf}
\caption {Temperature dependent capacitance response to 5000ppm methanol measured over three weeks.} \label{Fig_S21}
\end{figure}

% %%%%%%%%%%%%%%%%%%%%%%%%%%%%%%%%%%%%%%%%%%
% %%%%%%%%%%%%%%%% Section 8 %%%%%%%%%%%%%%%%%
\section{Temperature-dependent adsorption and desorption kinetic modelling}

In this section, the time-dependent kinetics of methanol fitted using double exponential model at different temperatures is described.
The curve fit is obtained using Equation \ref{Eq5} for the adsorption process and described in Figures \ref{Fig_S22}a - d. Equation \ref{Eq6} is used for the curve fit of the desorption process and shown in Figures \ref{Fig_S23}a - d.
The kinetic parameters extracted for the adsorption and desorption curves with corresponding regression co-coefficients is shown in Table \ref{Table_3} and Table \ref{Table_4} respectively.

\begin{equation}\label{Eq5}
  \frac{\Delta C}{C_{max}} = A_{1a} (1-e^{-k_1}) + A_{2a} (1-e^{-k_2})
\end{equation}

\begin{equation}\label{Eq6}
  \frac{\Delta C}{C_{max}} = A_{1d} (e^{-k_3}) + A_{2d} (e^{-k_4})
\end{equation}


\begin{figure}[H]
\centering
\includegraphics[width=12 cm]{Images/Fig_S22.pdf}
\caption{Time-dependent adsorption kinetic fit for exposure to methanol concentration of 5000ppm at (\textbf{a}) 20$^\circ$C (\textbf{b}) 30$^\circ$C (\textbf{c}) 40$^\circ$C (\textbf{d}) 50$^\circ$C.} \label{Fig_S22}
\end{figure}

\begin{figure}[H]
\centering
\includegraphics[width=12 cm]{Images/Fig_S23.pdf}
\caption{Time-dependent \hl{desorption} kinetic fit for exposure to methanol concentration of 5000ppm at (\textbf{a}) 20$^\circ$C(\textbf{b}) 30$^\circ$C (\textbf{c}) 40$^\circ$C (\textbf{d}) 50$^\circ$C.} \label{Fig_S23}
\end{figure}


\begin{table}[H]
\caption{Table of kinetic parameters and regression co-efficient for adsorption curves.}
\label{Table_3}
\centering
%% \tablesize{} %% You can specify the fontsize here, e.g.  \tablesize{\footnotesize}. If commented out \small will be used.
\begin{tabular}{cccc}
\toprule
\textbf{Temperature}	& \textbf{k$_1$}  & \textbf{k$_2$}  & \textbf{R$^2$}  \\
\midrule
20 &0.0158      &0.0029     &99.95   \\
30 &0.0151      &0.0021     &99.81    \\ 
40 &0.0141      &0.0035     &99.86     \\ 
50 &0.0131      &0.0049     &99.89    \\  
\bottomrule
\end{tabular}
\end{table}


\begin{table}[H]
\caption{Table of kinetic parameters and regression co-efficient for desorption curves.}
\label{Table_4}
\centering
%% \tablesize{} %% You can specify the fontsize here, e.g.  \tablesize{\footnotesize}. If commented out \small will be used.
\begin{tabular}{cccc}
\toprule
\textbf{Temperature}	& \textbf{k$_3$}  & \textbf{k$_4$}  & \textbf{R$^2$}  \\
\midrule
20 &0.0141     &0.0010    &99.86   \\
30 &0.0109     &0.0021   &99.89    \\ 
40 &0.0107     &0.0020   &99.85    \\ 
50 &0.0108     &0.0060    &99.80     \\  
\bottomrule
\end{tabular}
\end{table}


%%%%%%%%%%%%%%%%%%%%%%%%%%%%%%%%%%%%%%%%%%
% \section{Patents}
% This section is not mandatory, but may be added if there are patents resulting from the work reported in this manuscript.

%%%%%%%%%%%%%%%%%%%%%%%%%%%%%%%%%%%%%%%%%%
\vspace{6pt} 

%%%%%%%%%%%%%%%%%%%%%%%%%%%%%%%%%%%%%%%%%%
%% optional
%\supplementary{The following are available online at \linksupplementary{s1}, Figure S1: title, Table S1: title, Video S1: title.}

% Only for the journal Methods and Protocols:
% If you wish to submit a video article, please do so with any other supplementary material.
% \supplementary{The following are available at \linksupplementary, Figure S1: title, Table S1: title, Video S1: title. A supporting video article is available at doi: link.}

%%%%%%%%%%%%%%%%%%%%%%%%%%%%%%%%%%%%%%%%%%
% \acknowledgments{}

%%%%%%%%%%%%%%%%%%%%%%%%%%%%%%%%%%%%%%%%%%
% \authorcontributions{
% For research articles with several authors, a short paragraph specifying their individual contributions must be provided. 
% The following statements should be used Author 1. and Author 2. conceived and designed the experiments; Author 1. performed the experiments; X.X. and Y.Y. analyzed the data; W.W. contributed reagents/materials/analysis tools; Author 1. wrote the paper. 
% Authorship must be limited to those who have contributed substantially to the work reported.
% }

%%%%%%%%%%%%%%%%%%%%%%%%%%%%%%%%%%%%%%%%%%
% \conflictsofinterest{} 
% Authors must identify and declare any personal circumstances or interest that may be perceived as inappropriately influencing the representation or interpretation of reported research results. Any role of the funding sponsors in the design of the study; in the collection, analyses or interpretation of data; in the writing of the manuscript, or in the decision to publish the results must be declared in this section. If there is no role, please state ``The founding sponsors had no role in the design of the study; in the collection, analyses, or interpretation of data; in the writing of the manuscript, and in the decision to publish the results''.


%%%%%%%%%%%%%%%%%%%%%%%%%%%%%%%%%%%%%%%%%%
% %% optional
% \abbreviations{The following abbreviations are used in this manuscript:\\

% \noindent 
% \begin{tabular}{@{}ll}
% MDPI & Multidisciplinary Digital Publishing Institute\\
% DOAJ & Directory of open access journals\\
% TLA & Three letter acronym\\
% LD & linear dichroism
% \end{tabular}}

%%%%%%%%%%%%%%%%%%%%%%%%%%%%%%%%%%%%%%%%%%
%% optional
% \appendixtitles{no} %Leave argument "no" if all appendix headings stay EMPTY (then no dot is printed after "Appendix A"). If the appendix sections contain a heading then change the argument to "yes".
% \appendixsections{multiple} %Leave argument "multiple" if there are multiple sections. Then a counter is printed ("Appendix A"). If there is only one appendix section then change the argument to "one" and no counter is printed ("Appendix").
% \appendix
% \section{}
% \subsection{}
% The appendix is an optional section that can contain details and data supplemental to the main text. For example, explanations of experimental details that would disrupt the flow of the main text, but nonetheless remain crucial to understanding and reproducing the research shown; figures of replicates for experiments of which representative data is shown in the main text can be added here if brief, or as Supplementary data. Mathematical proofs of results not central to the paper can be added as an appendix.

% \section{}
% All appendix sections must be cited in the main text. In the appendixes, Figures, Tables, etc. should be labeled starting with `A', e.g., Figure A1, Figure A2, etc. 

%%%%%%%%%%%%%%%%%%%%%%%%%%%%%%%%%%%%%%%%%%
% Citations and References in Supplementary files are permitted provided that they also appear in the reference list here. 

%=====================================
% References, variant A: internal bibliography
%=====================================
% \reftitle{References}
% \begin{thebibliography}{999}
% % %Reference 1
% % \bibitem[Author1(year)]{ref-journal}
% % Author1, T. The title of the cited article. {\em Journal Abbreviation} {\bf 2008}, {\em 10}, 142-149, DOI.
% % % Reference 2
% % \bibitem[Author2(year)]{ref-book}
% % Author2, L. The title of the cited contribution. In {\em The Book Title}; Editor1, F., Editor2, A., Eds.; Publishing House: City, Country, 2007; pp. 32-58, ISBN.


% \bibitem[Author1(year)]{ref-journal}
% Author1, T. The title of the cited article. {\em Journal Abbreviation} {\bf 2008}, {\em 10}, 142-149, DOI.

% \end{thebibliography}

% The following MDPI journals use author-date citation: Arts, Econometrics, Economies, Genealogy, Humanities, IJFS, JRFM, Laws, Religions, Risks, Social Sciences. For those journals, please follow the formatting guidelines on http://www.mdpi.com/authors/references
% To cite two works by the same author: \citeauthor{ref-journal-1a} (\citeyear{ref-journal-1a}, \citeyear{ref-journal-1b}). This produces: Whittaker (1967, 1975)
% To cite two works by the same author with specific pages: \citeauthor{ref-journal-3a} (\citeyear{ref-journal-3a}, p. 328; \citeyear{ref-journal-3b}, p.475). This produces: Wong (1999, p. 328; 2000, p. 475)


%=====================================
% References, variant B: external bibliography
%=====================================
%\bibliographystyle{mdpi}
% \begin{thebibliography}{999}

\reftitle{References}
\bibliographystyle{mdpi}
\externalbibliography{yes}
\bibliography{References}


% \end{thebibliography}
%%%%%%%%%%%%%%%%%%%%%%%%%%%%%%%%%%%%%%%%%%
%% optional
% \sampleavailability{Samples of the compounds ...... are available from the authors.}

%%%%%%%%%%%%%%%%%%%%%%%%%%%%%%%%%%%%%%%%%%
\end{document}
