# Supplementary figures and images for: A Low-Power MEMS IDE Capacitor with Integrated Microhotplate: Application as Methanol Sensor using a Metal-Organic Framework Coating as Affinity Layer
Source: MDPI journal article supplement (doi:10.3390/s19040888), 2019-02-20

Power at 200°C

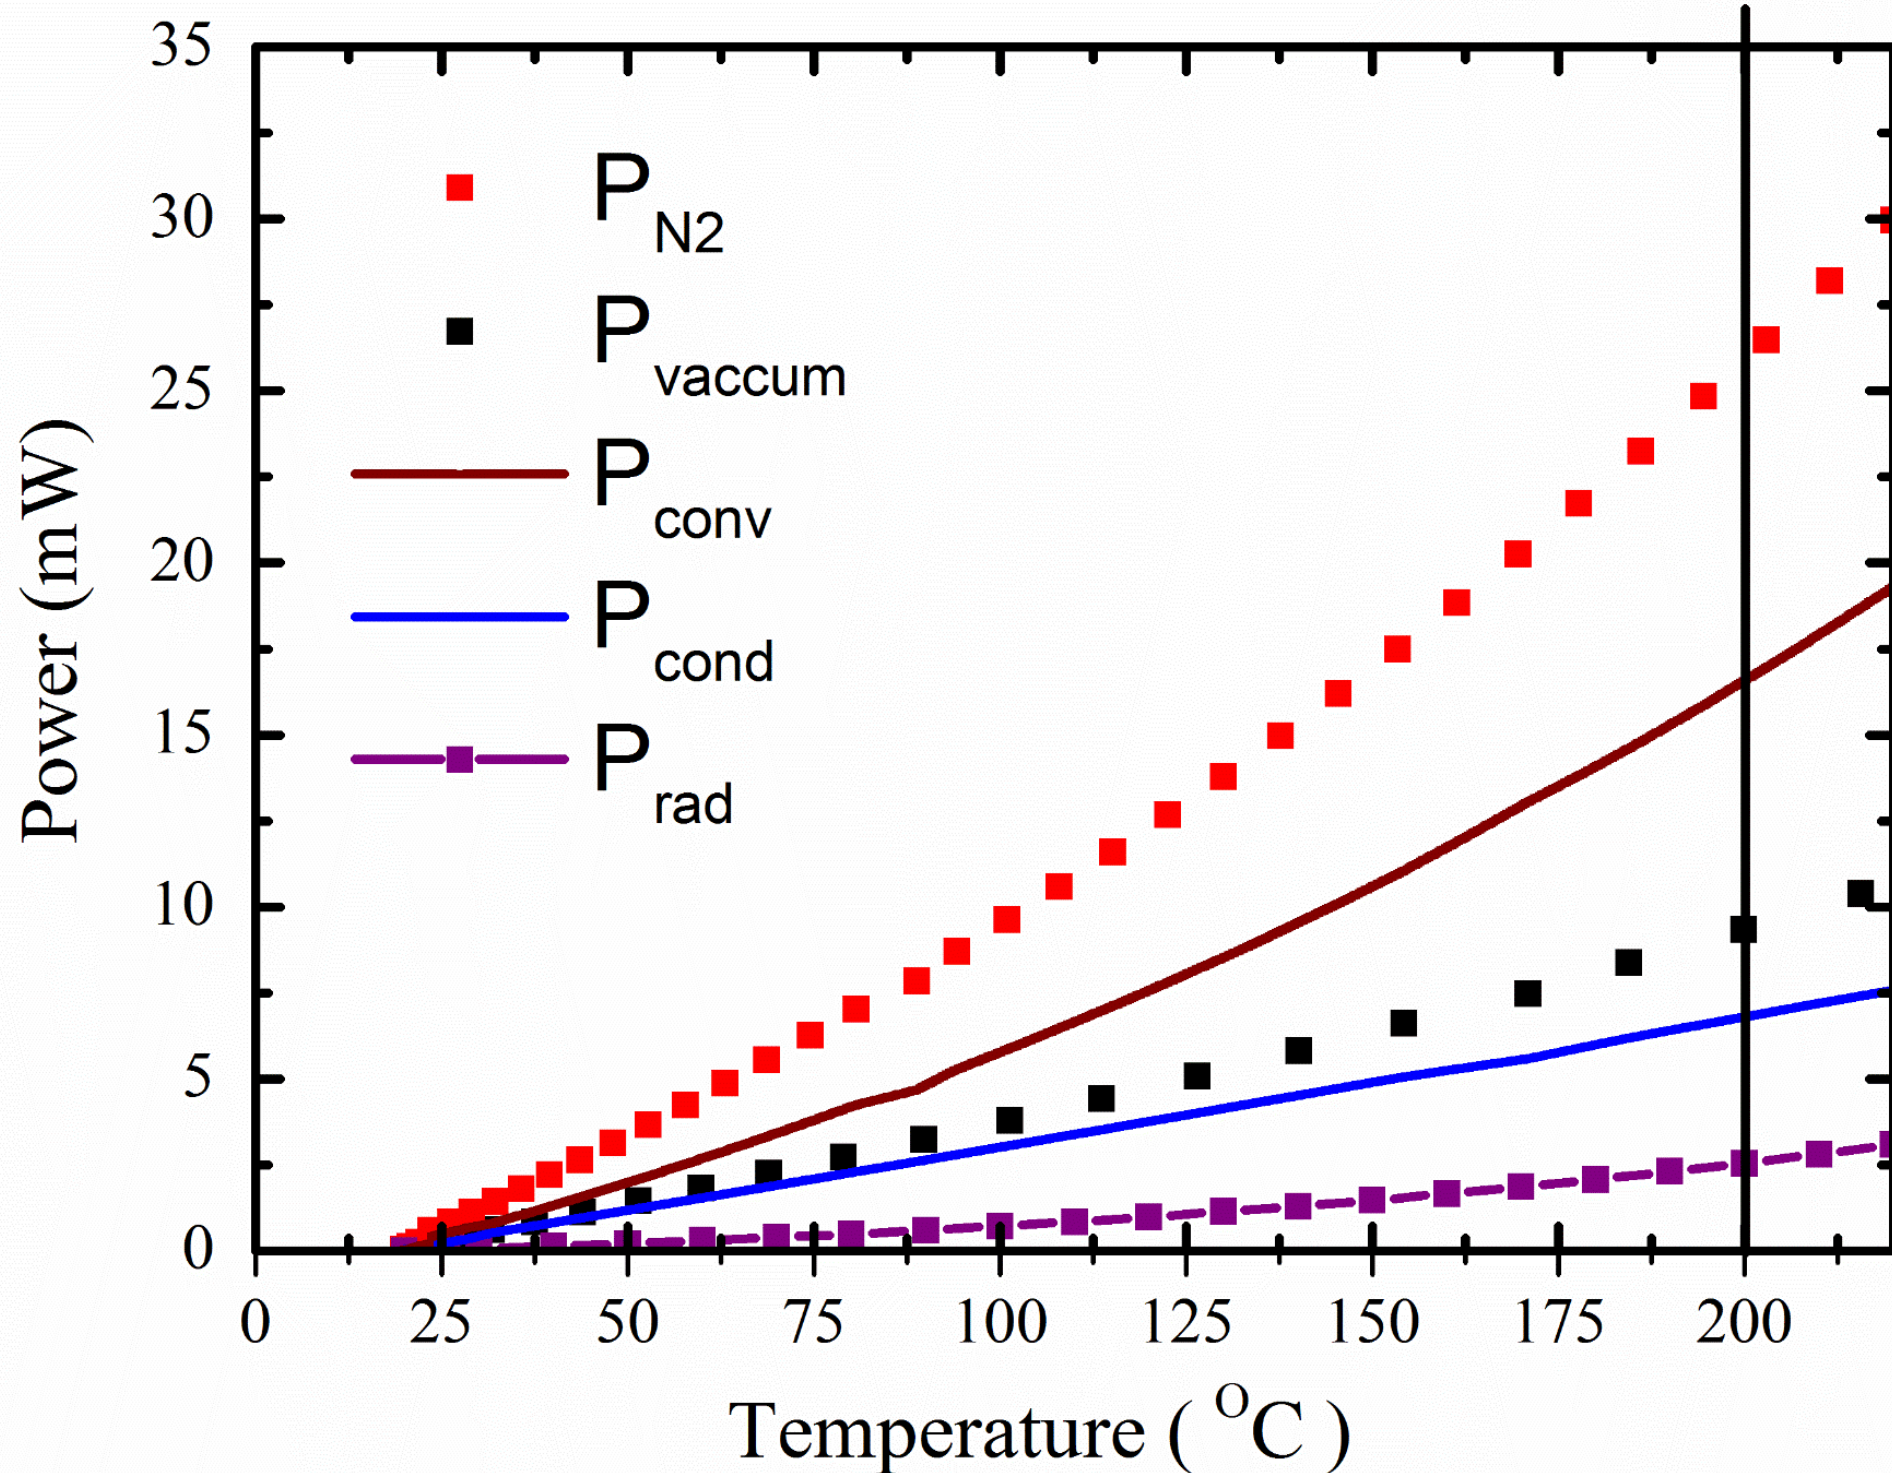

Supplement: s1 [file s1]

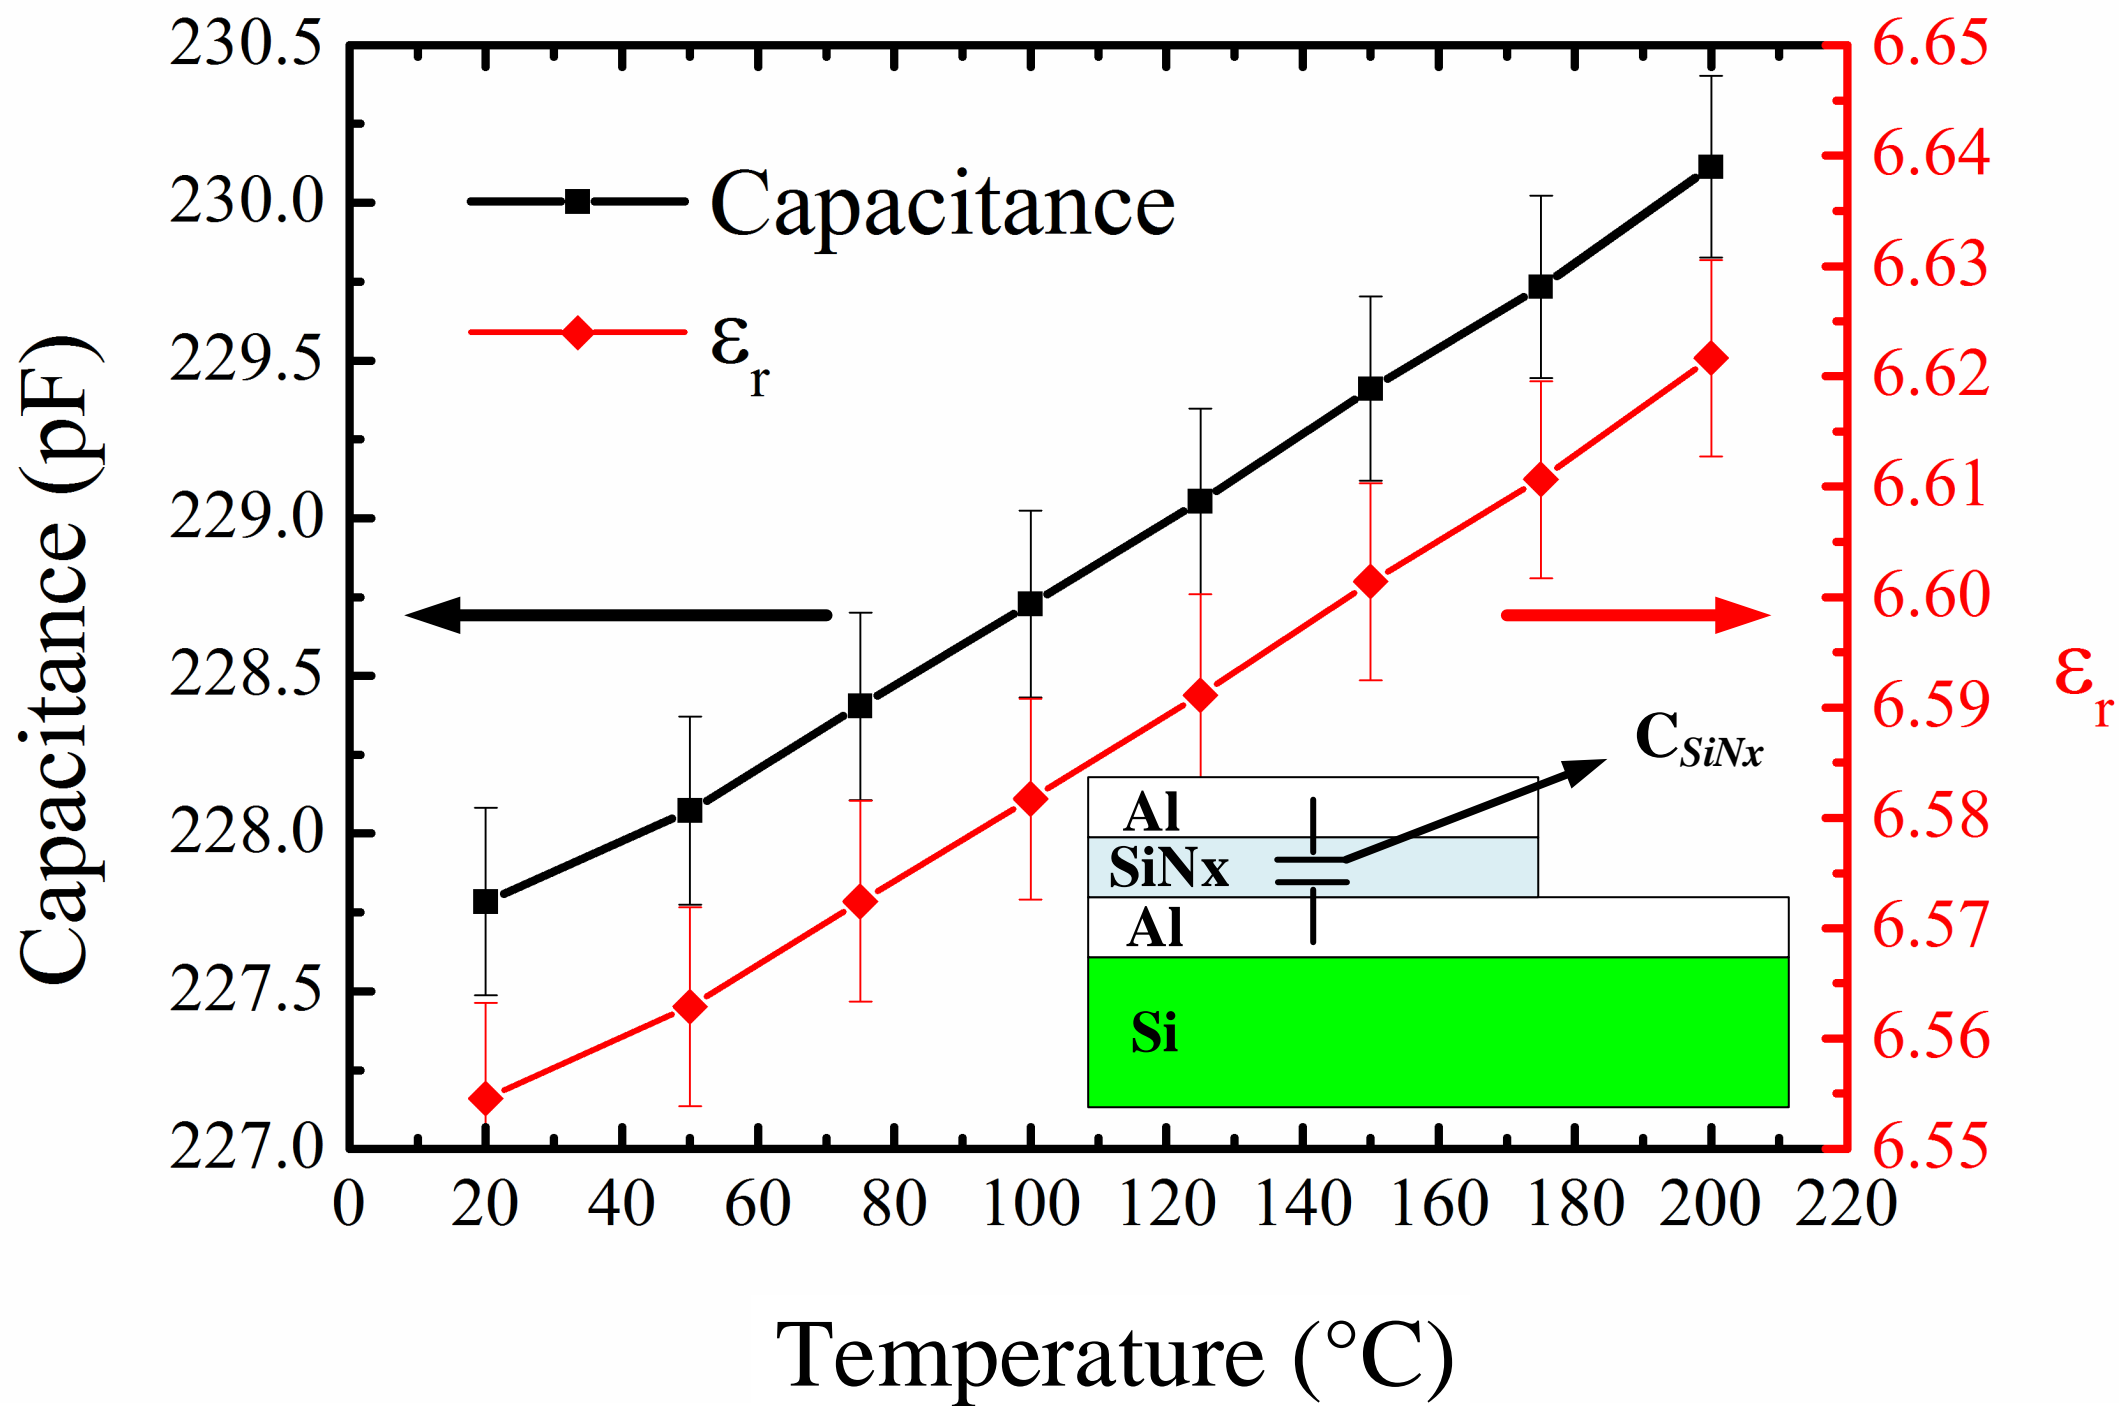

Supplement: s1 [file s1]

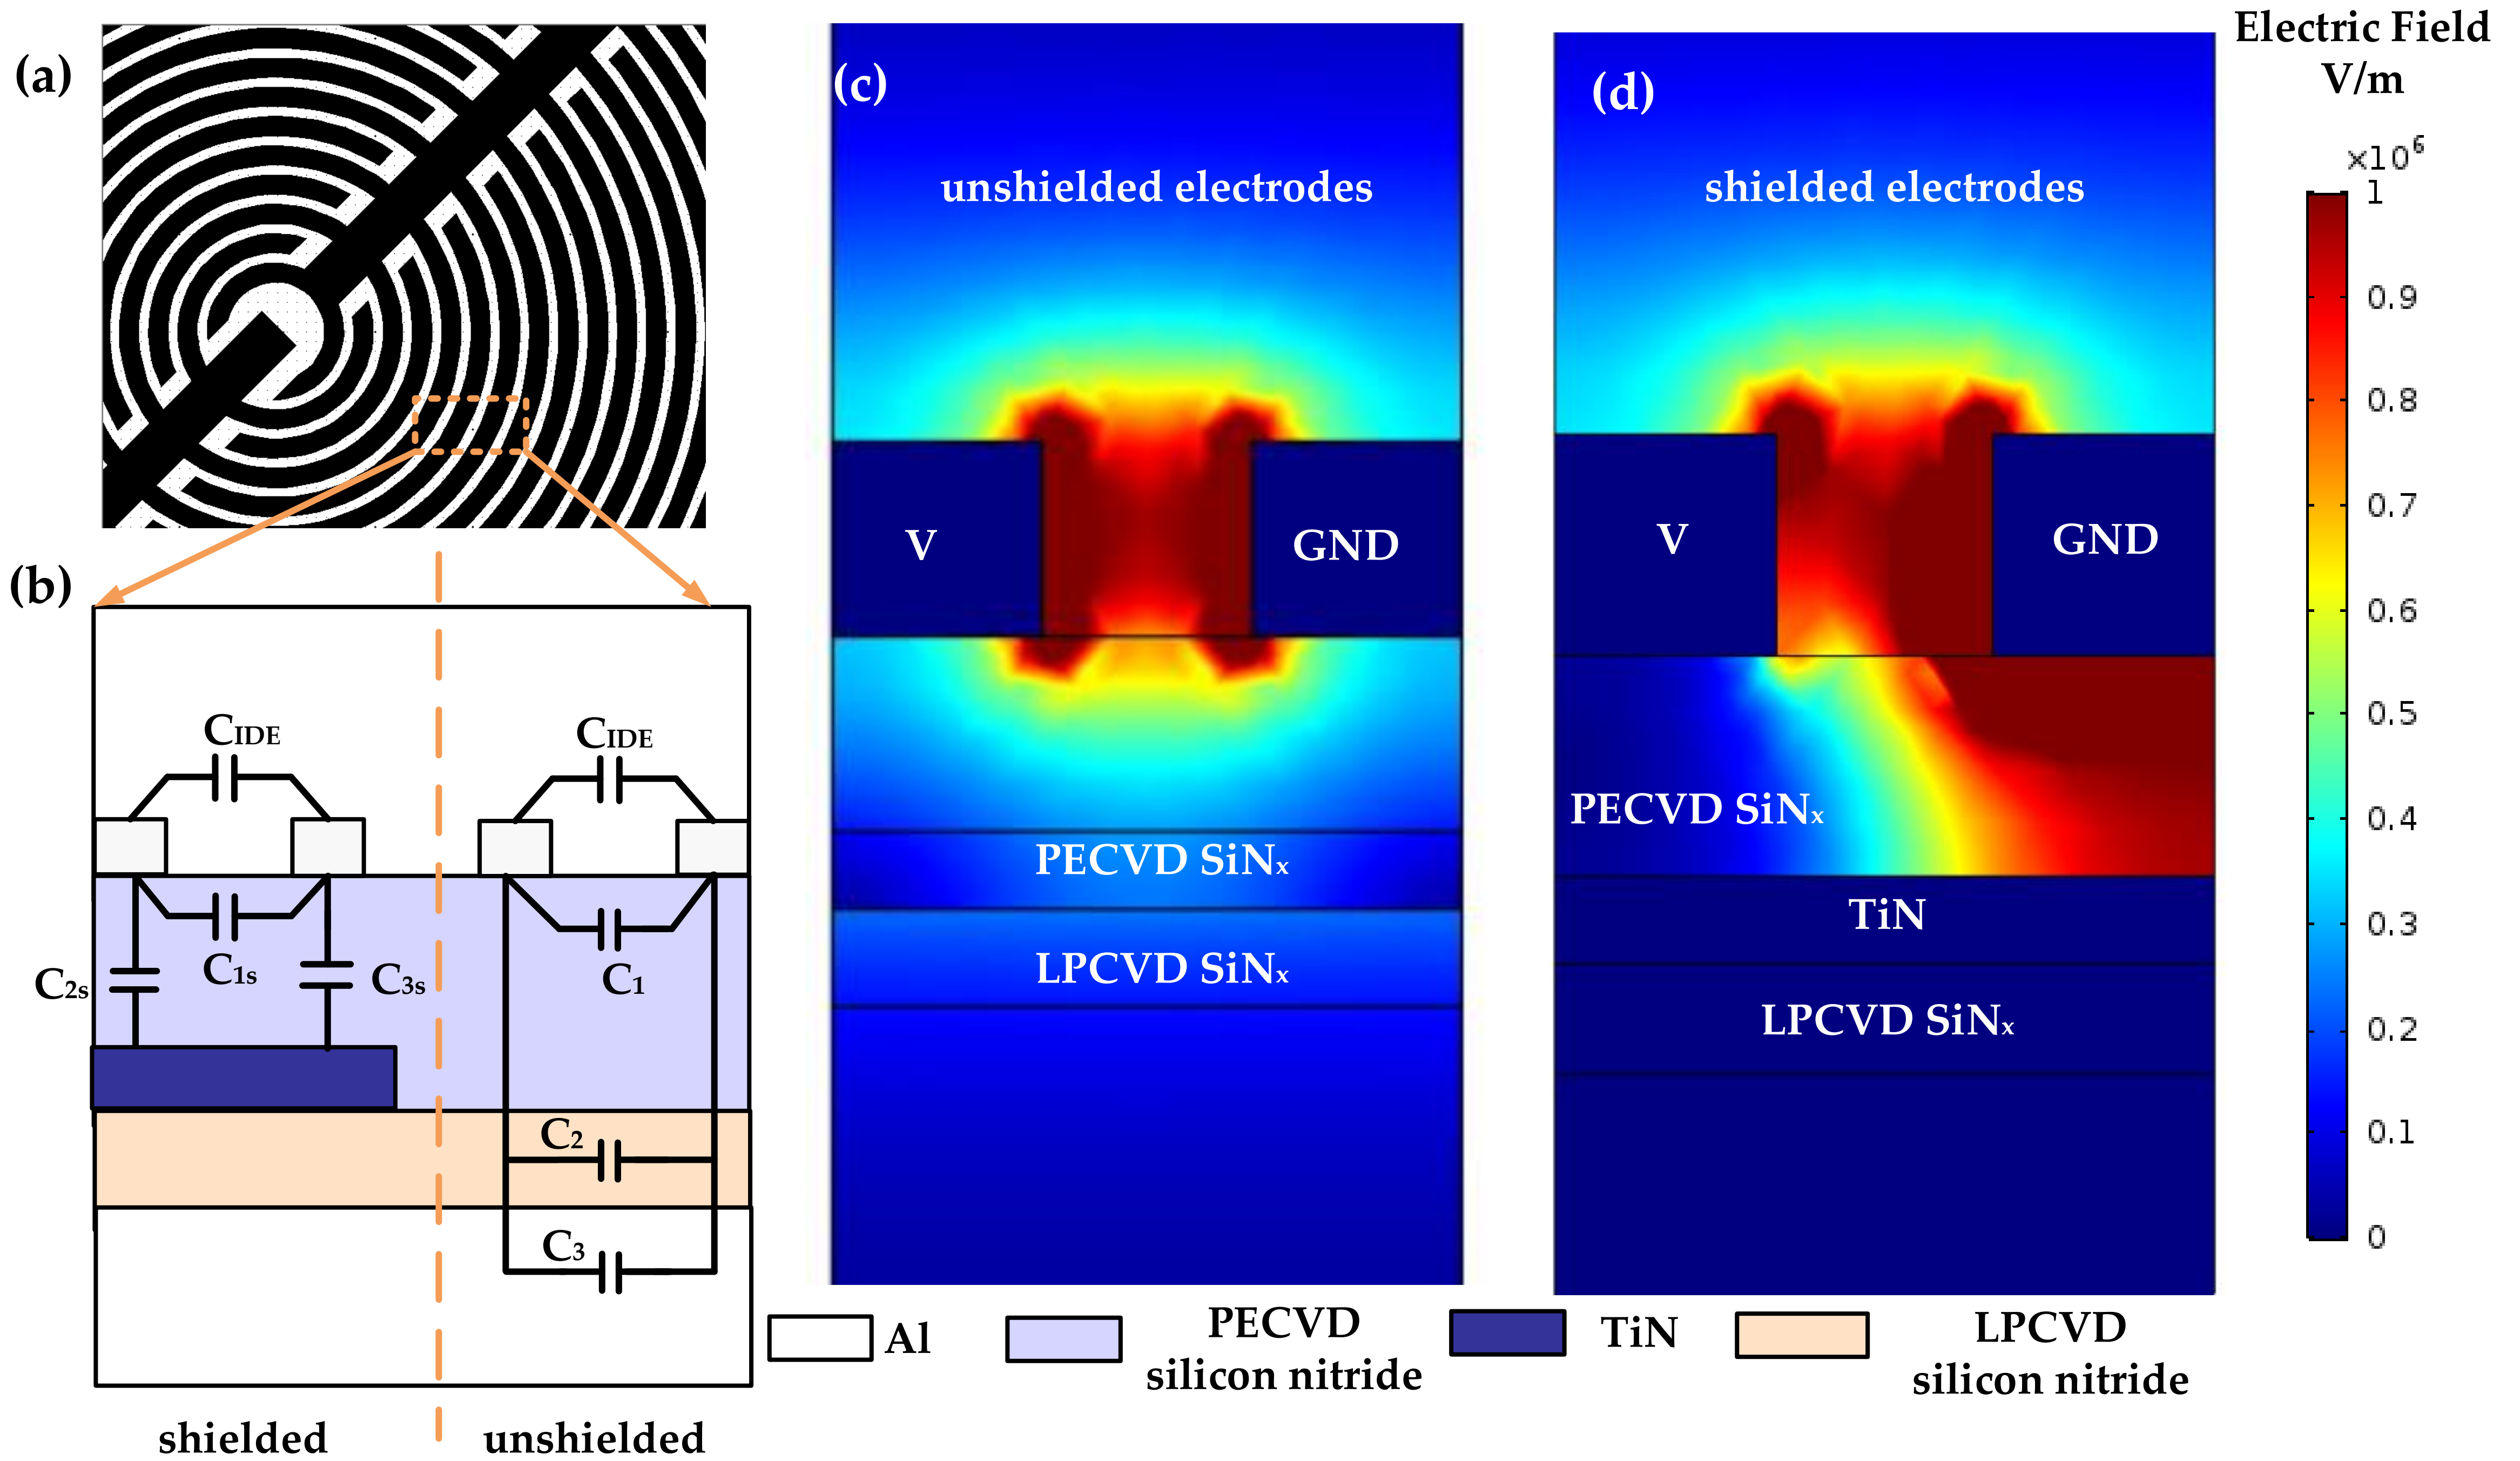

Supplement: s1 [file s1]

(a)

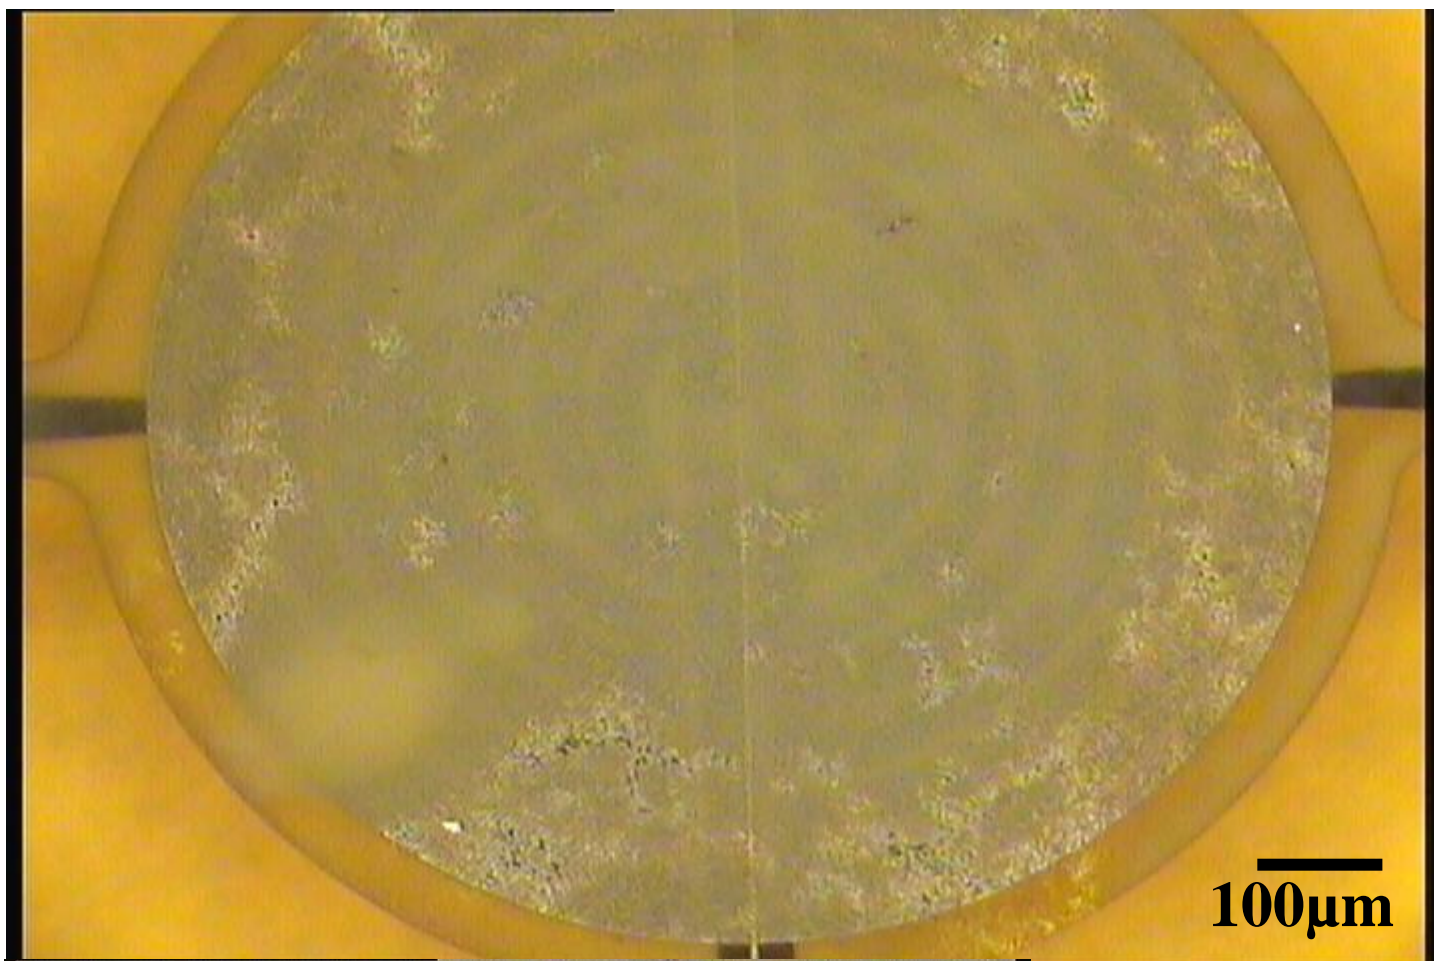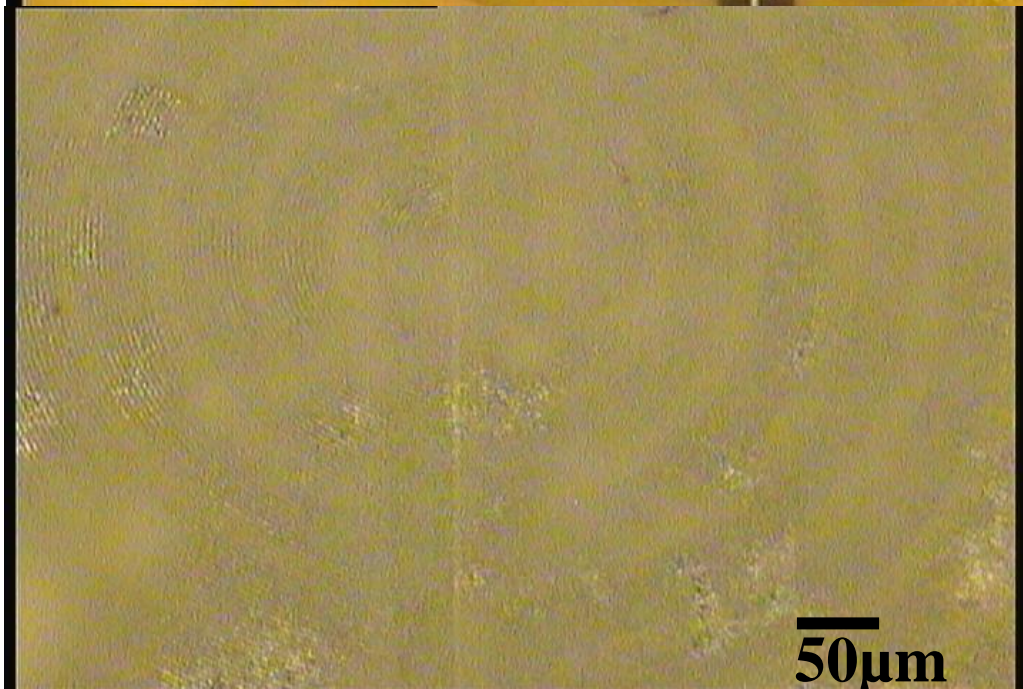

(b)

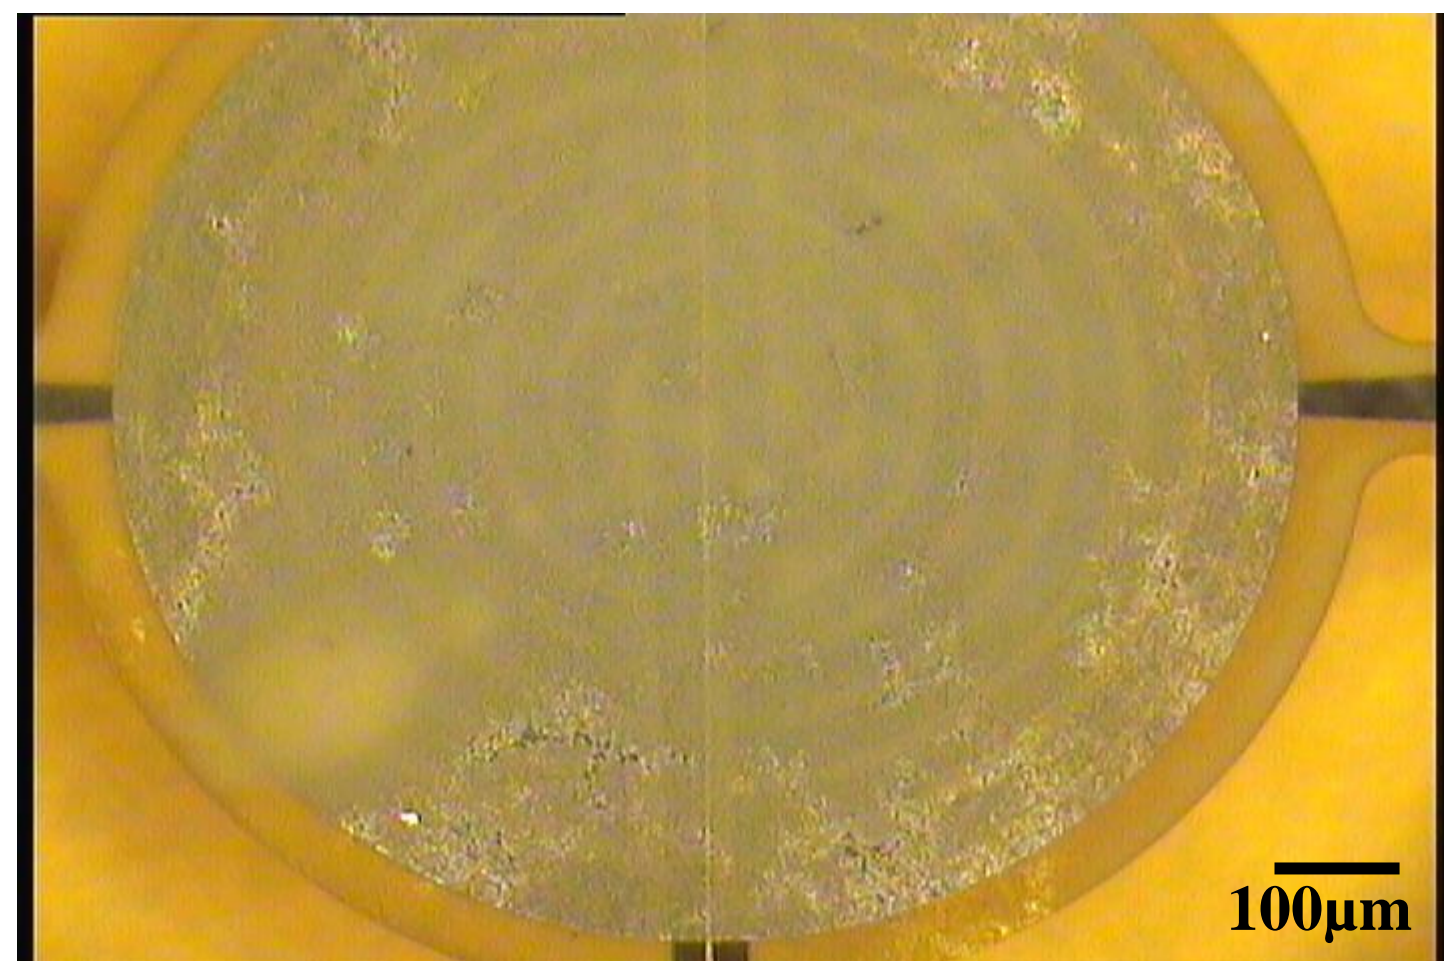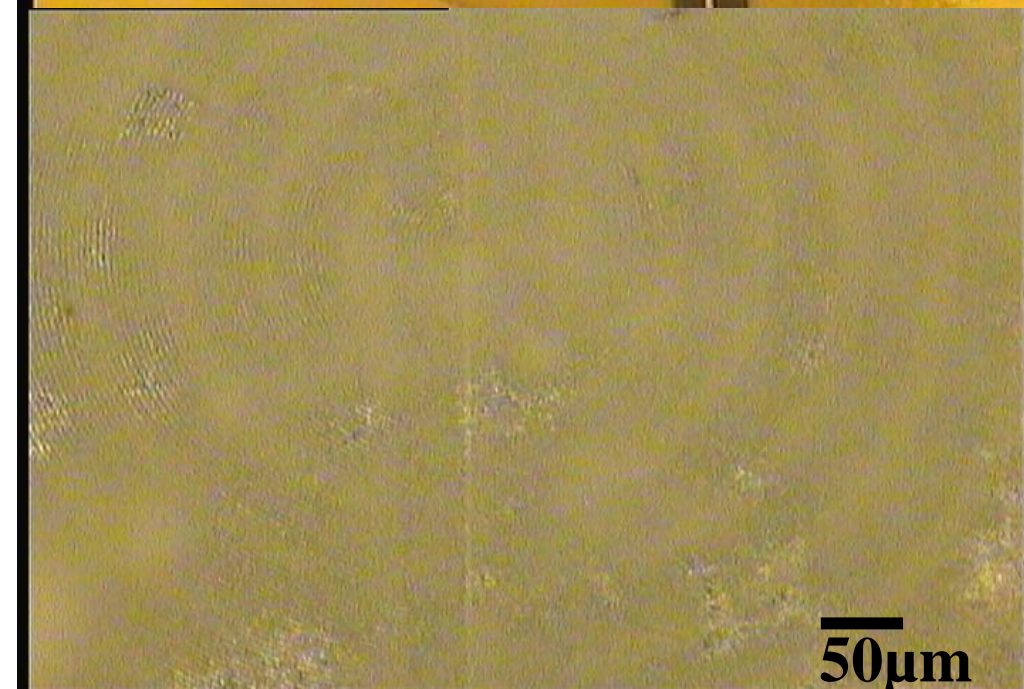

(c)

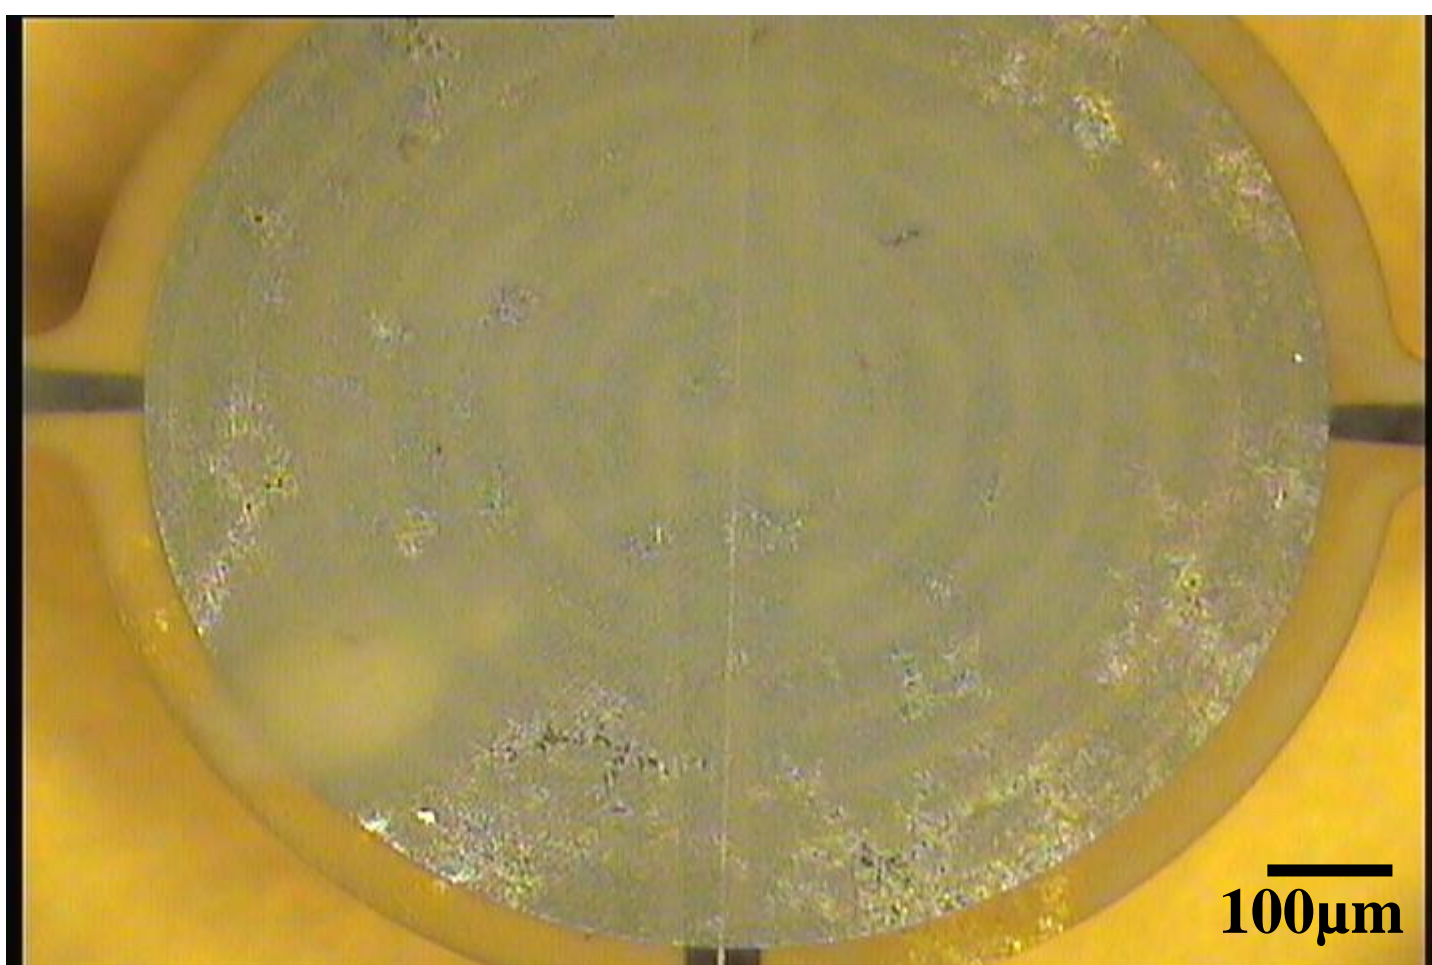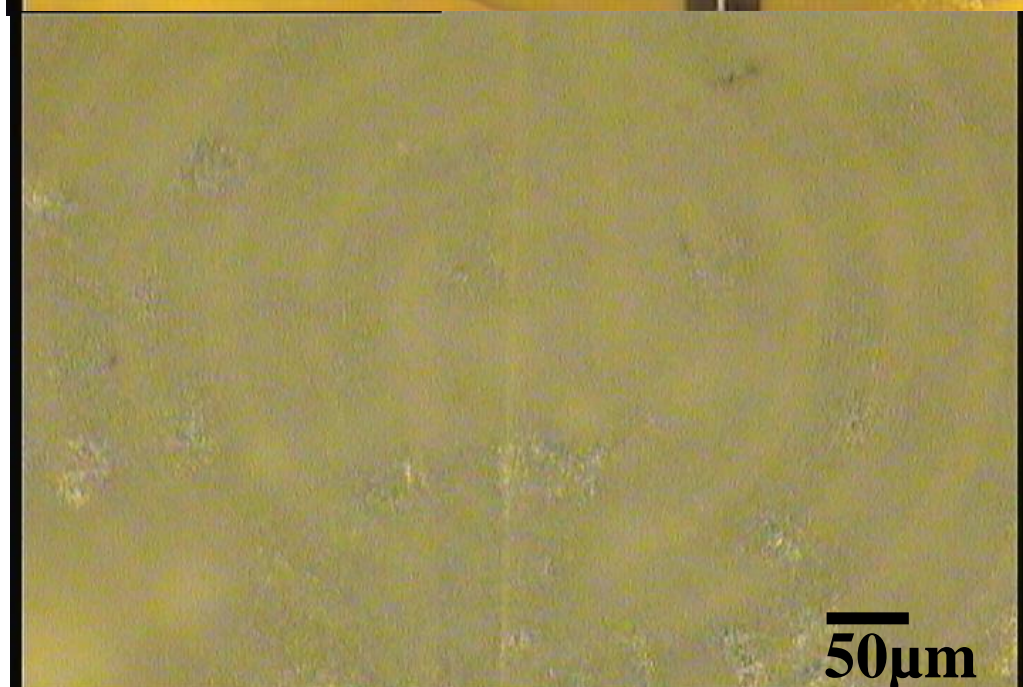

(d)

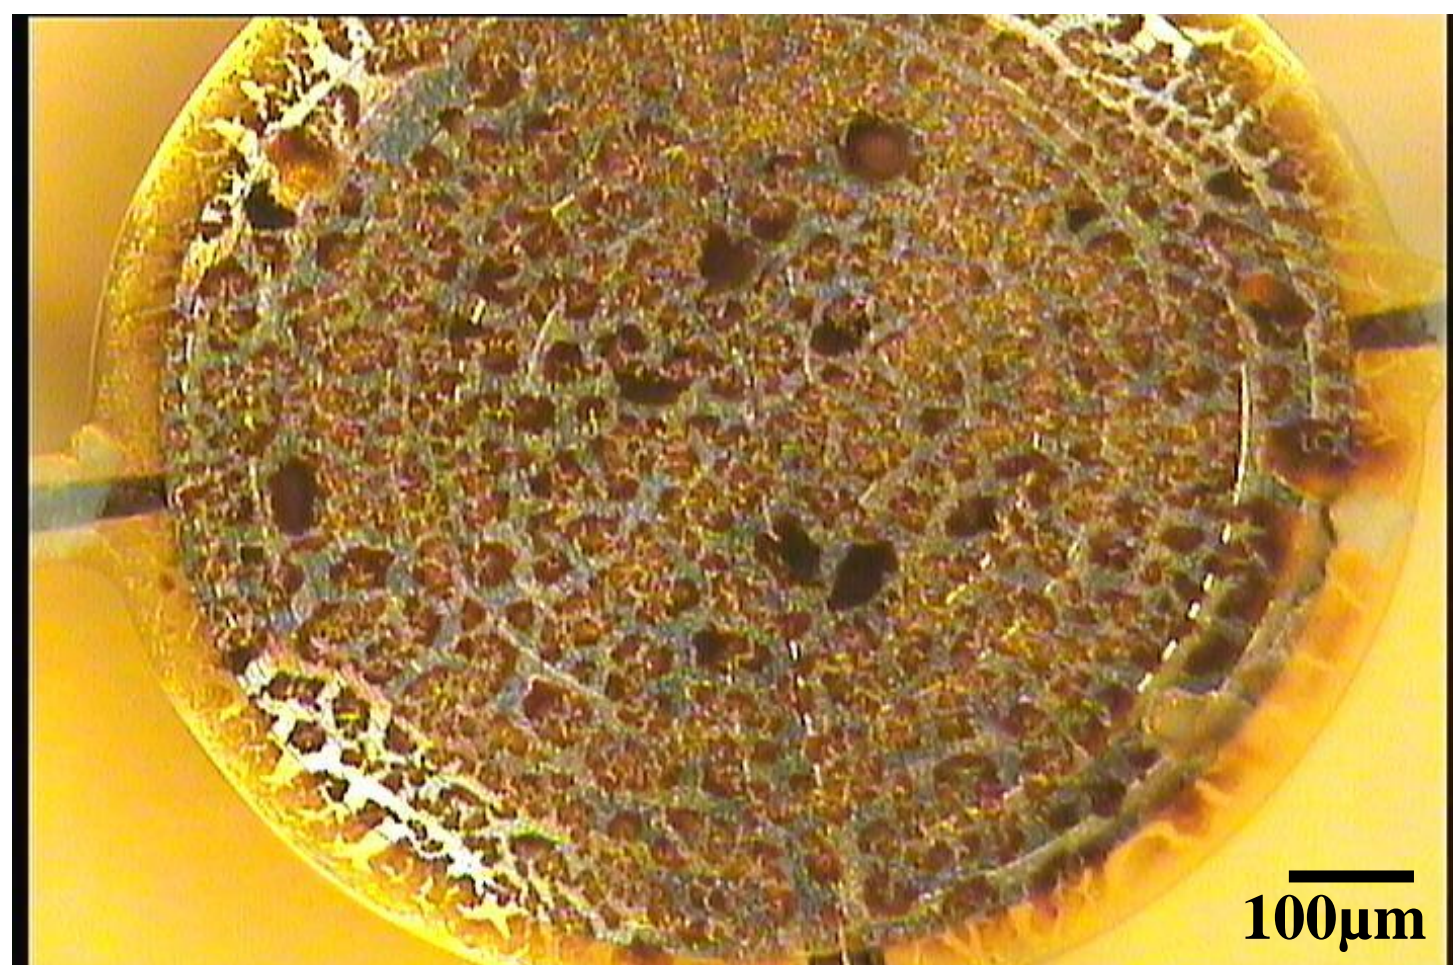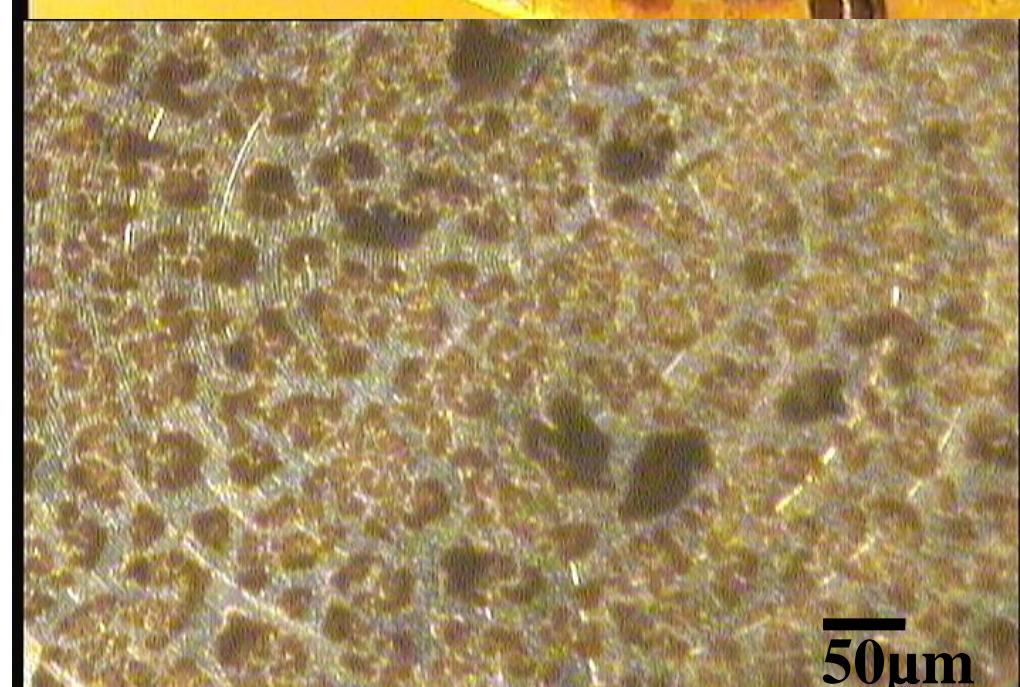

Supplement: s1 [file s1]

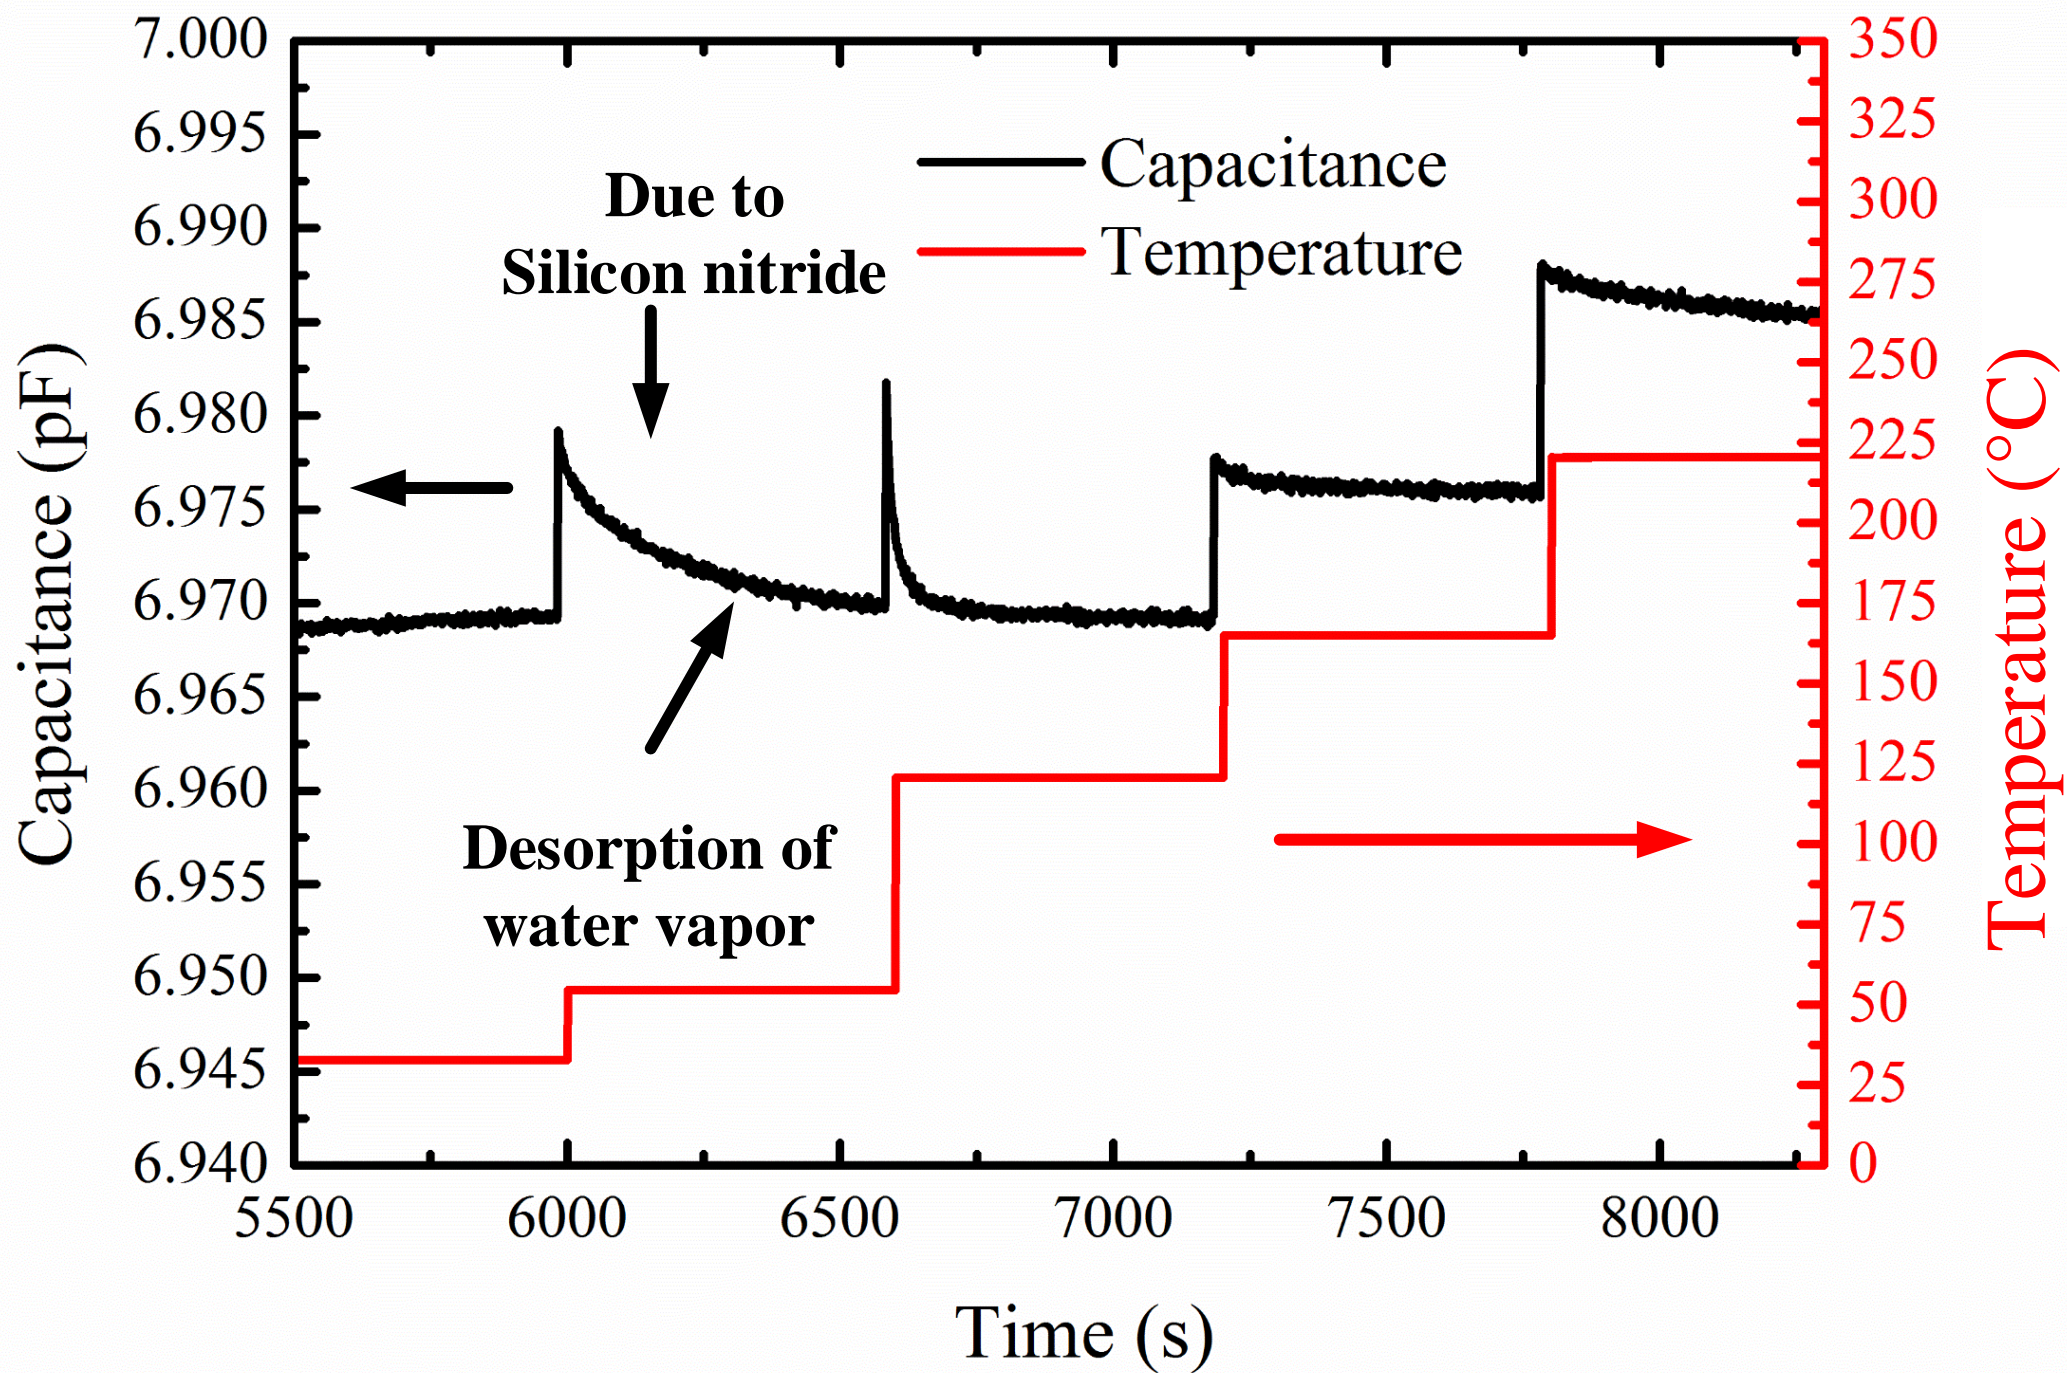

Supplement: s1 [file s1]

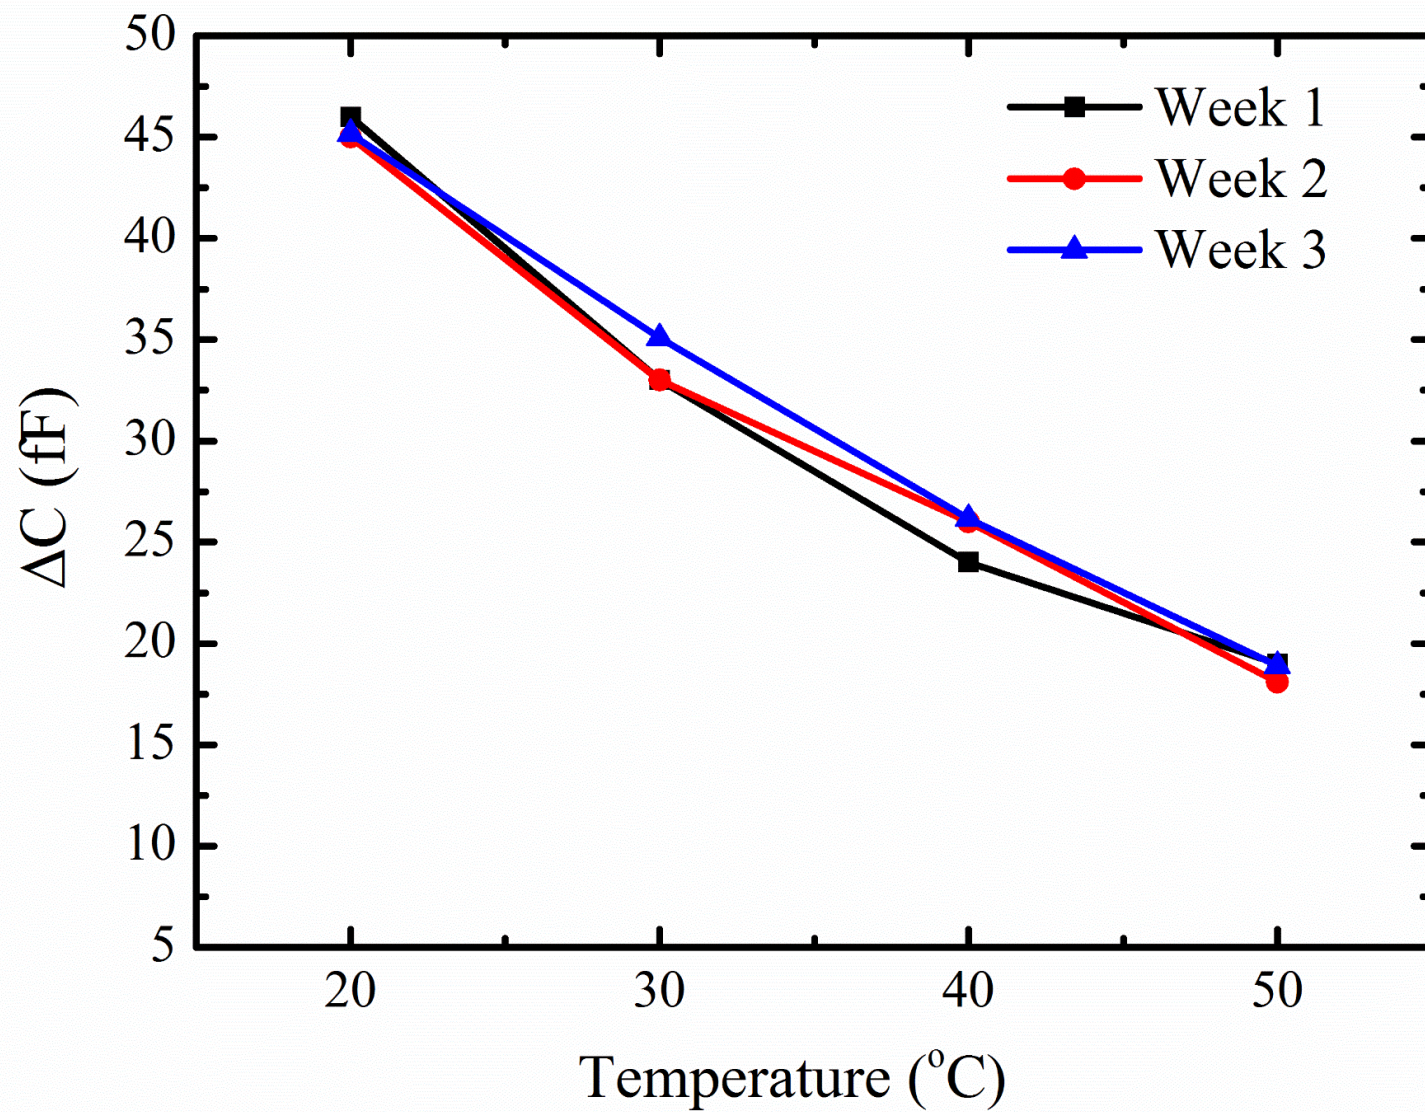

Supplement: s1 [file s1]

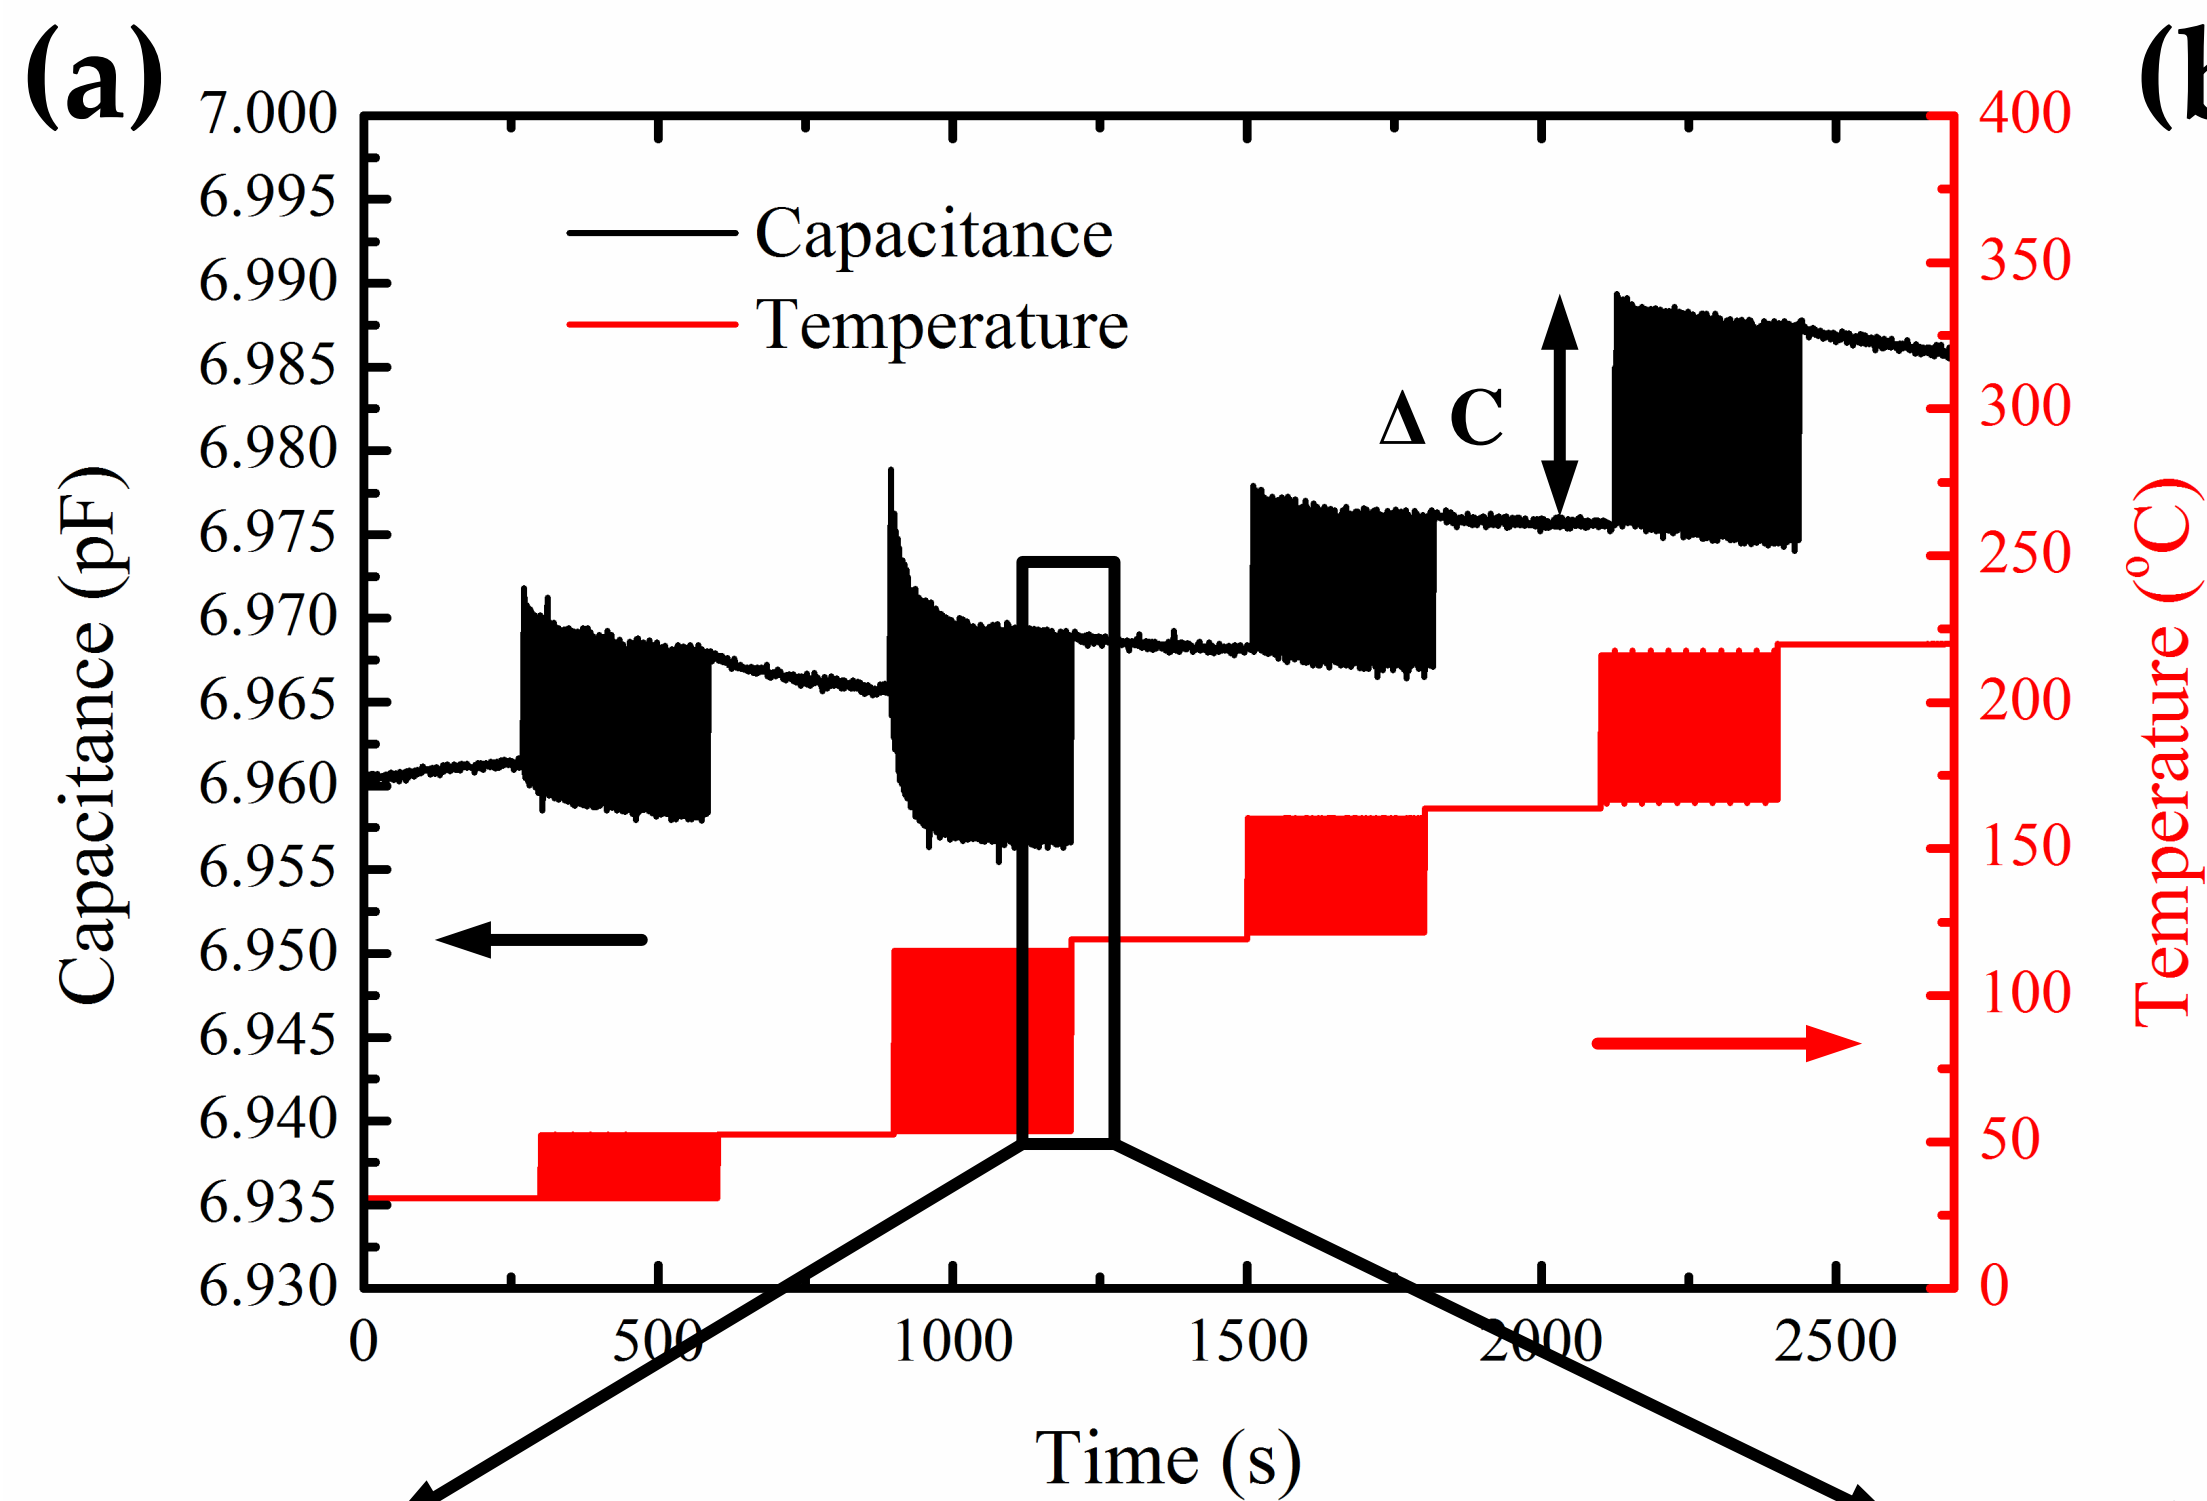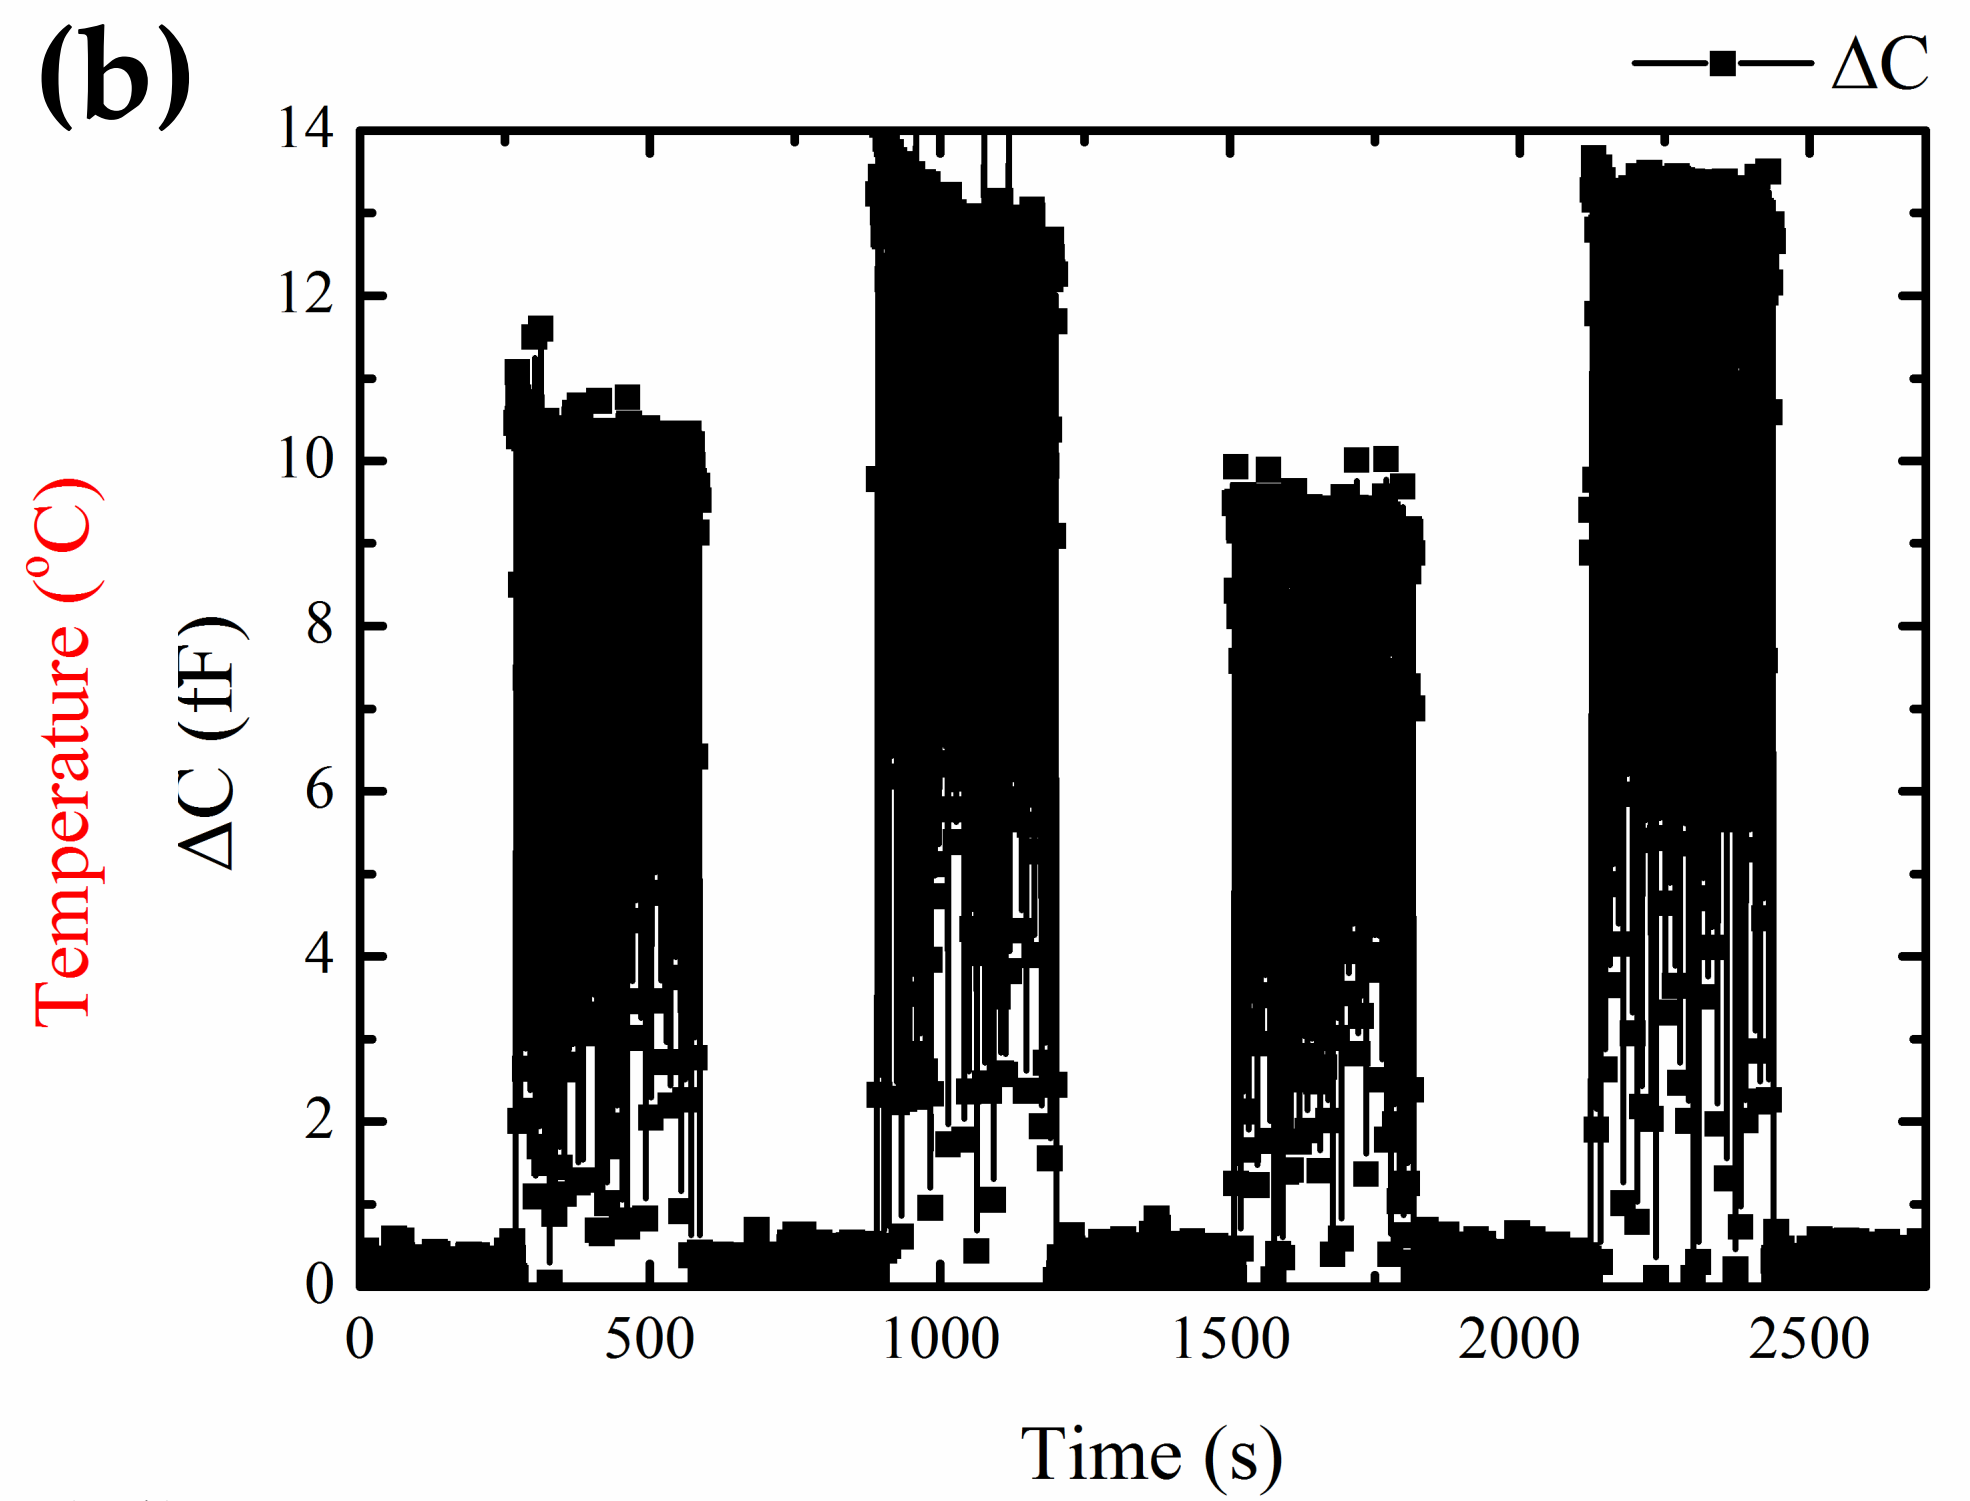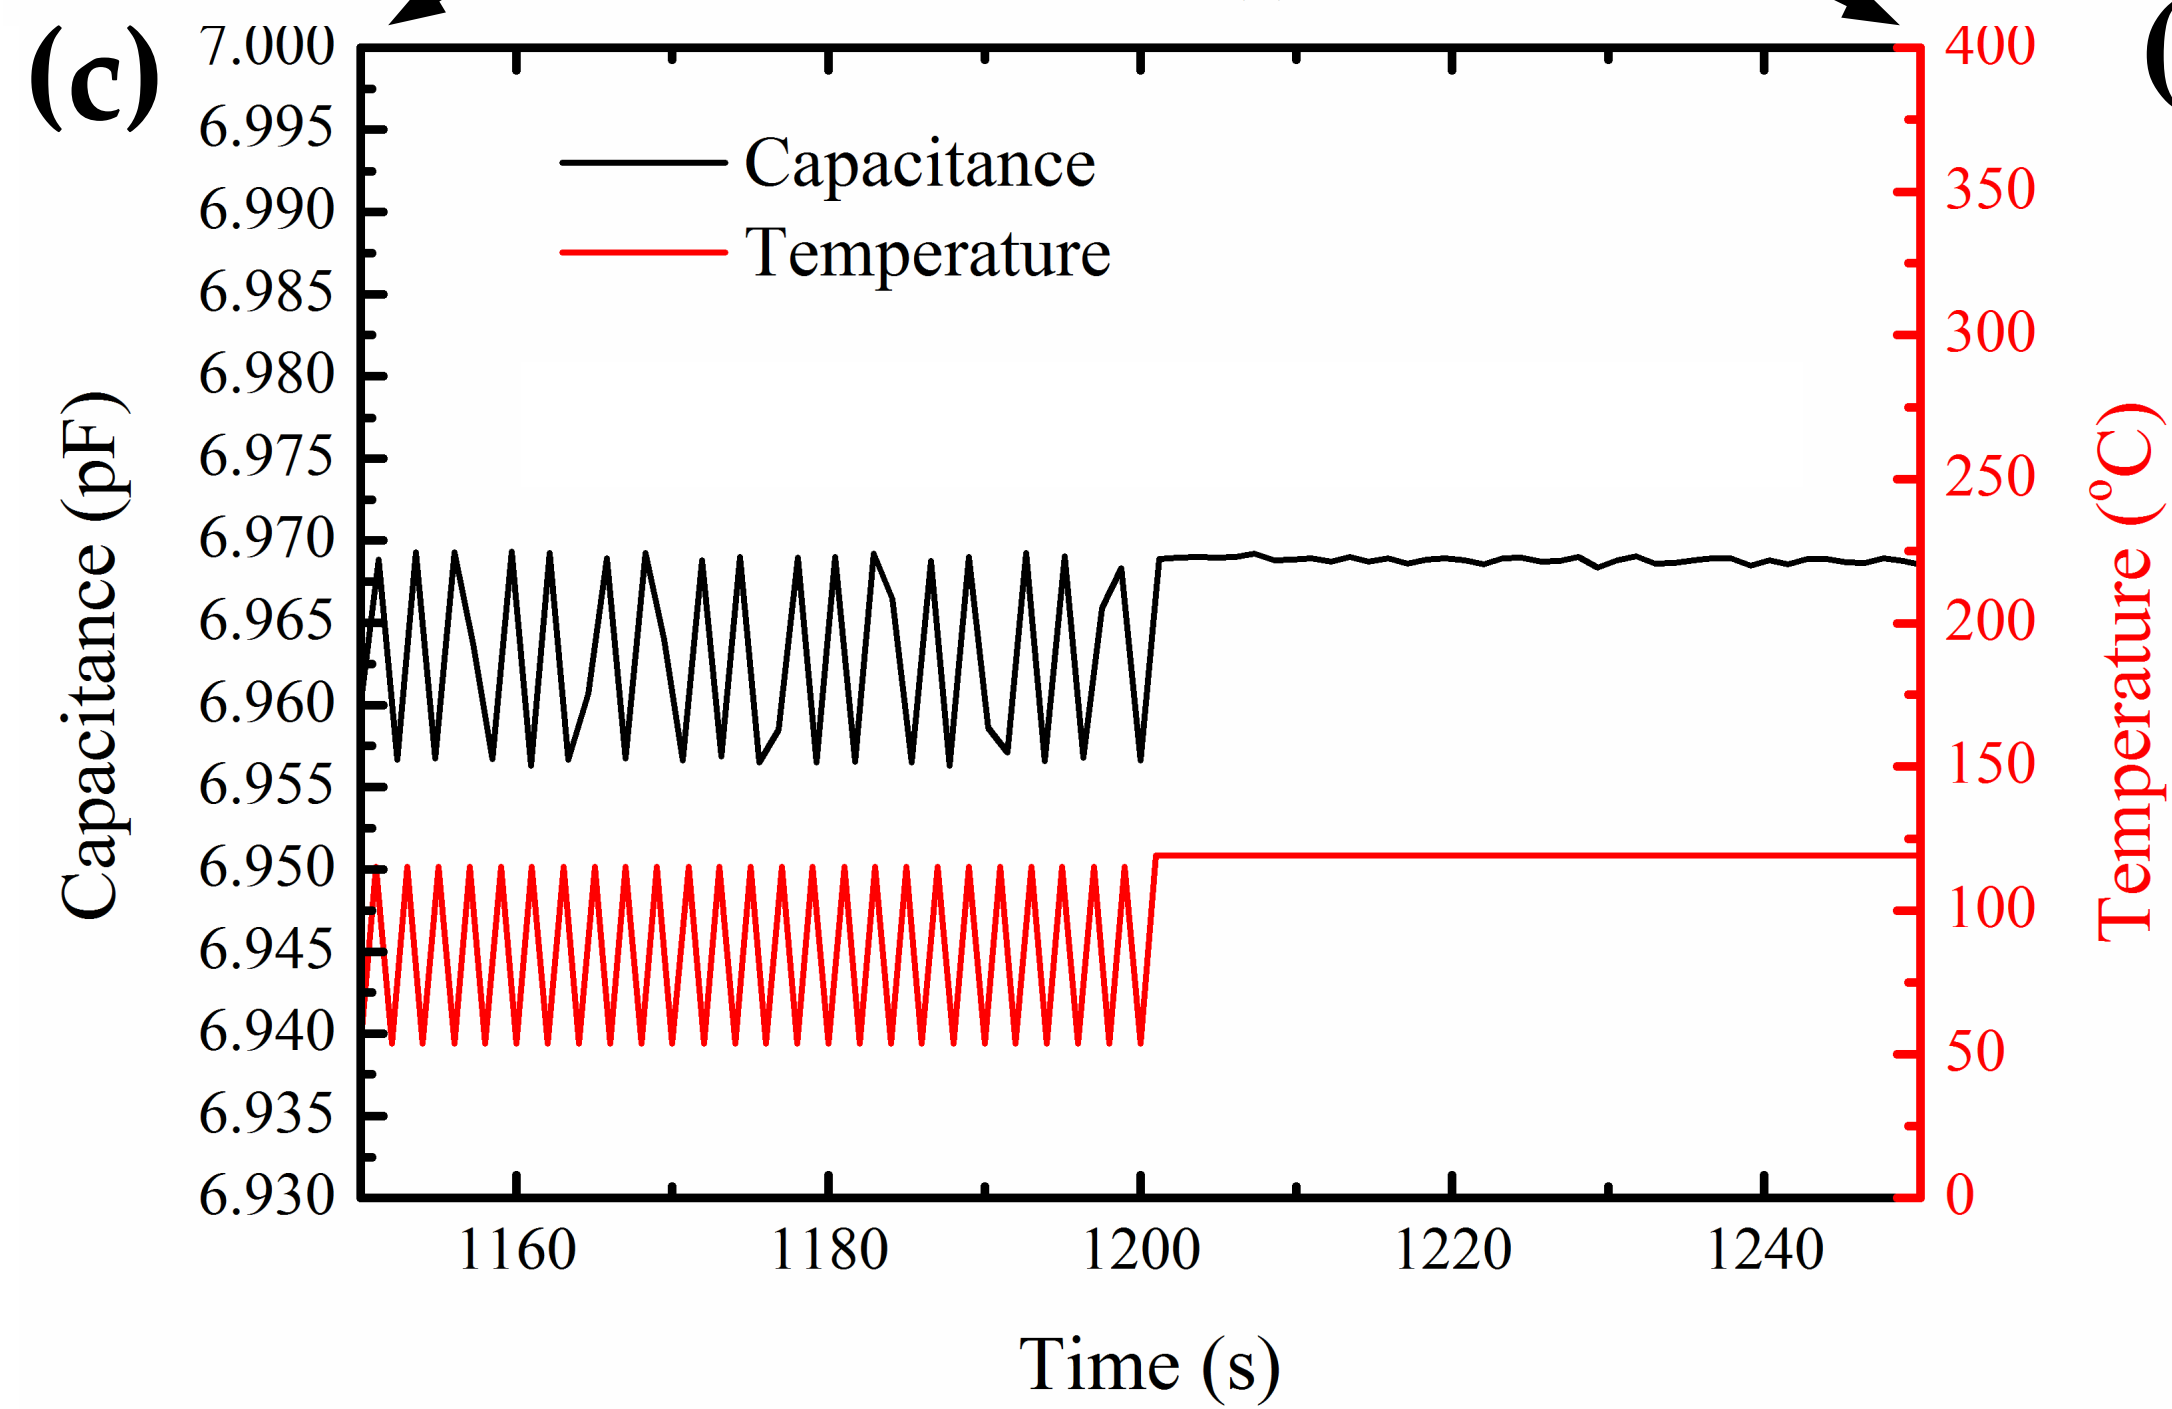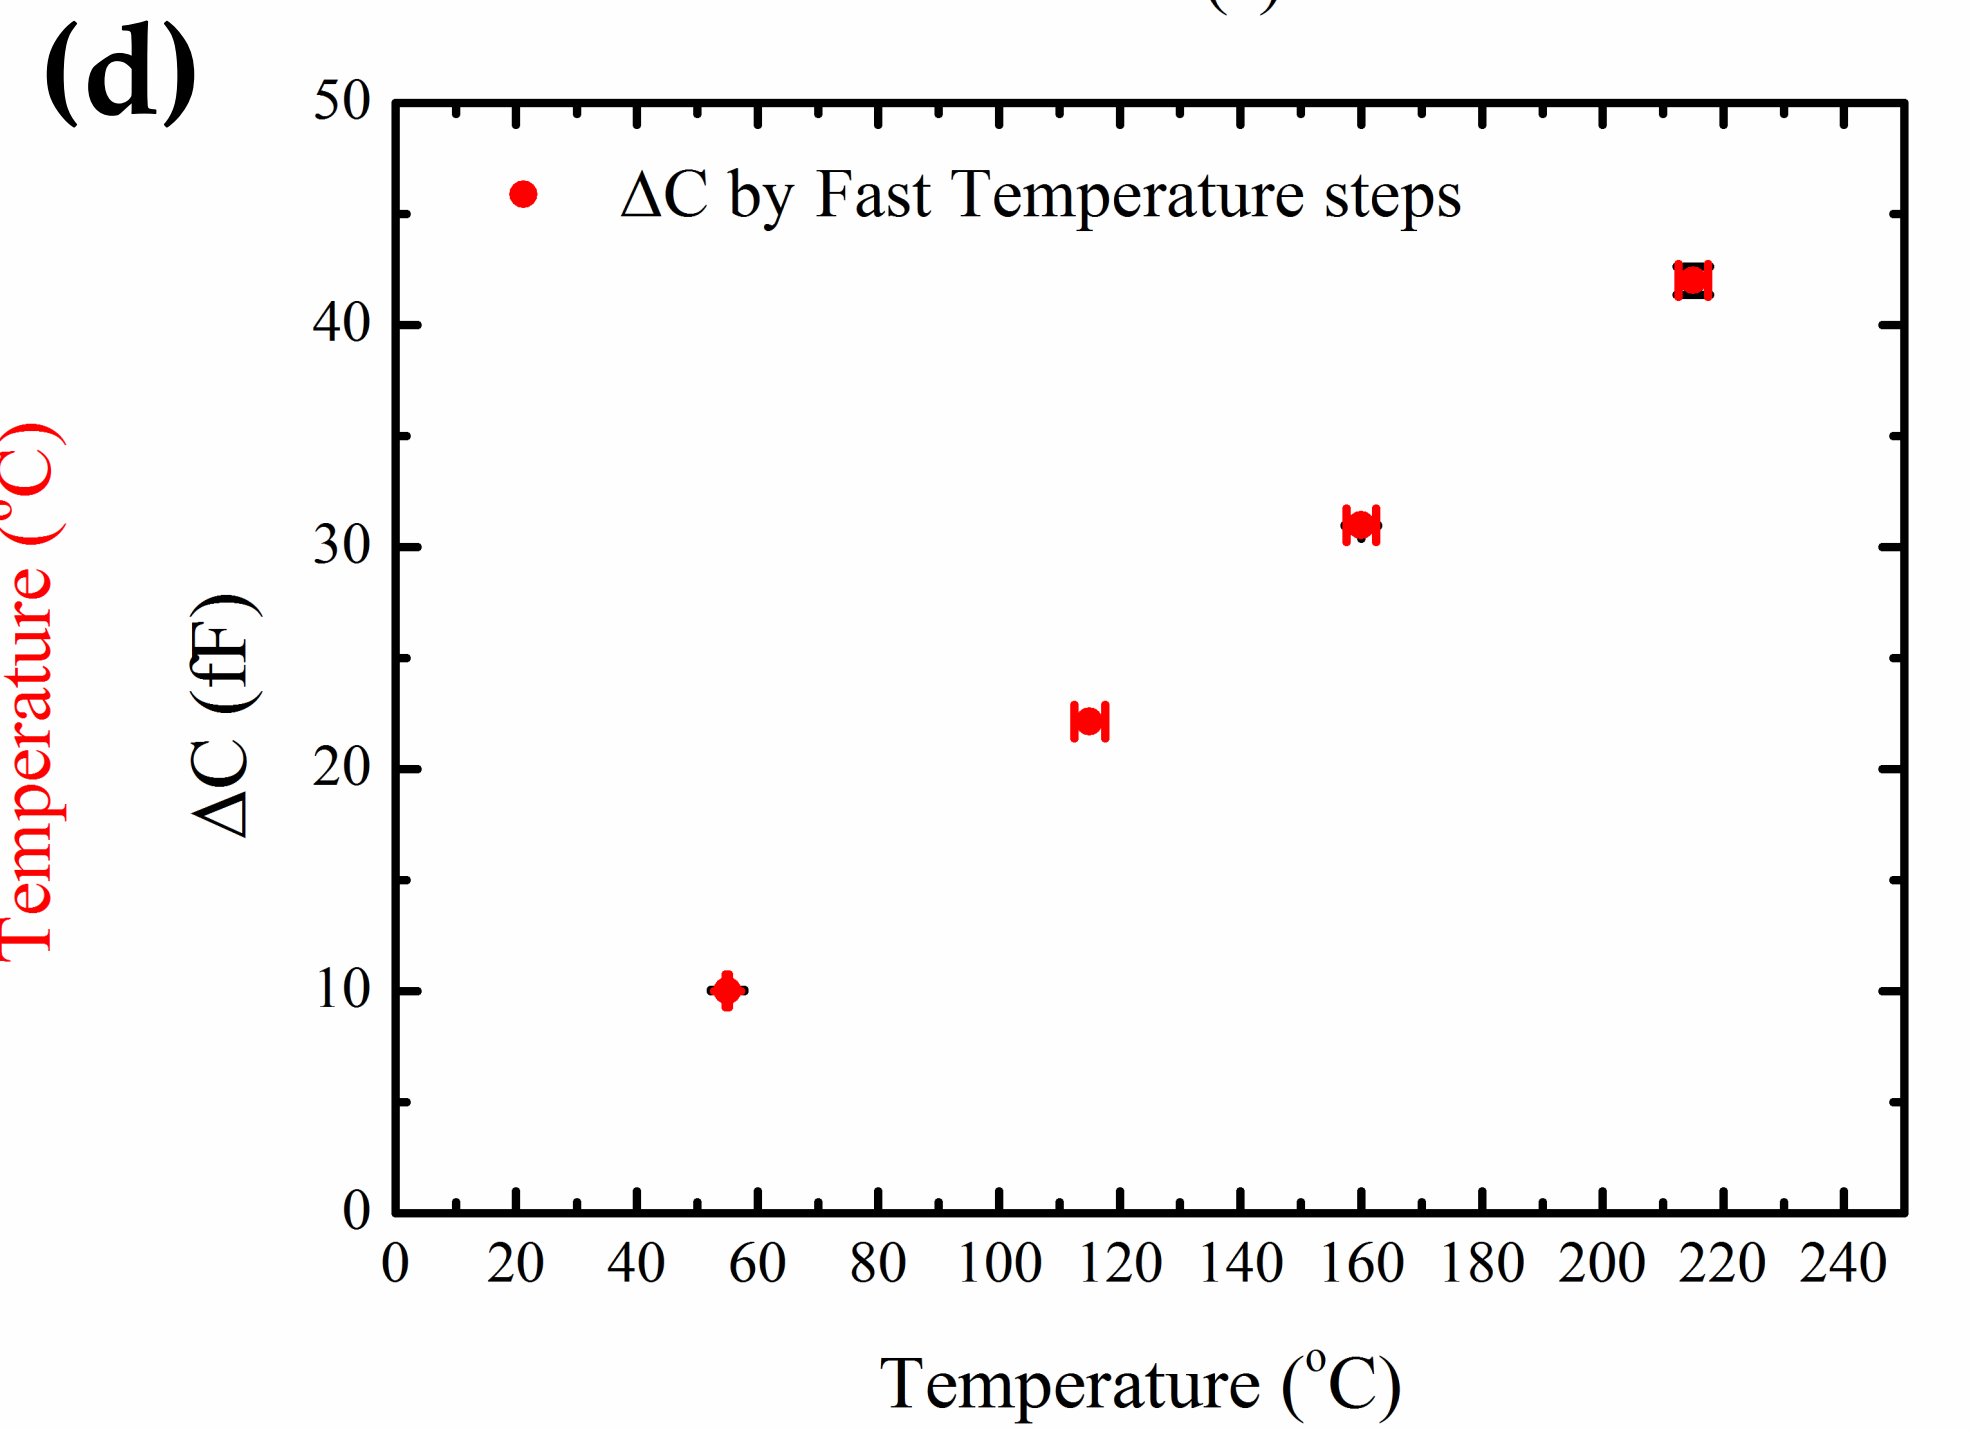

Supplement: s1 [file s1]

**(a)**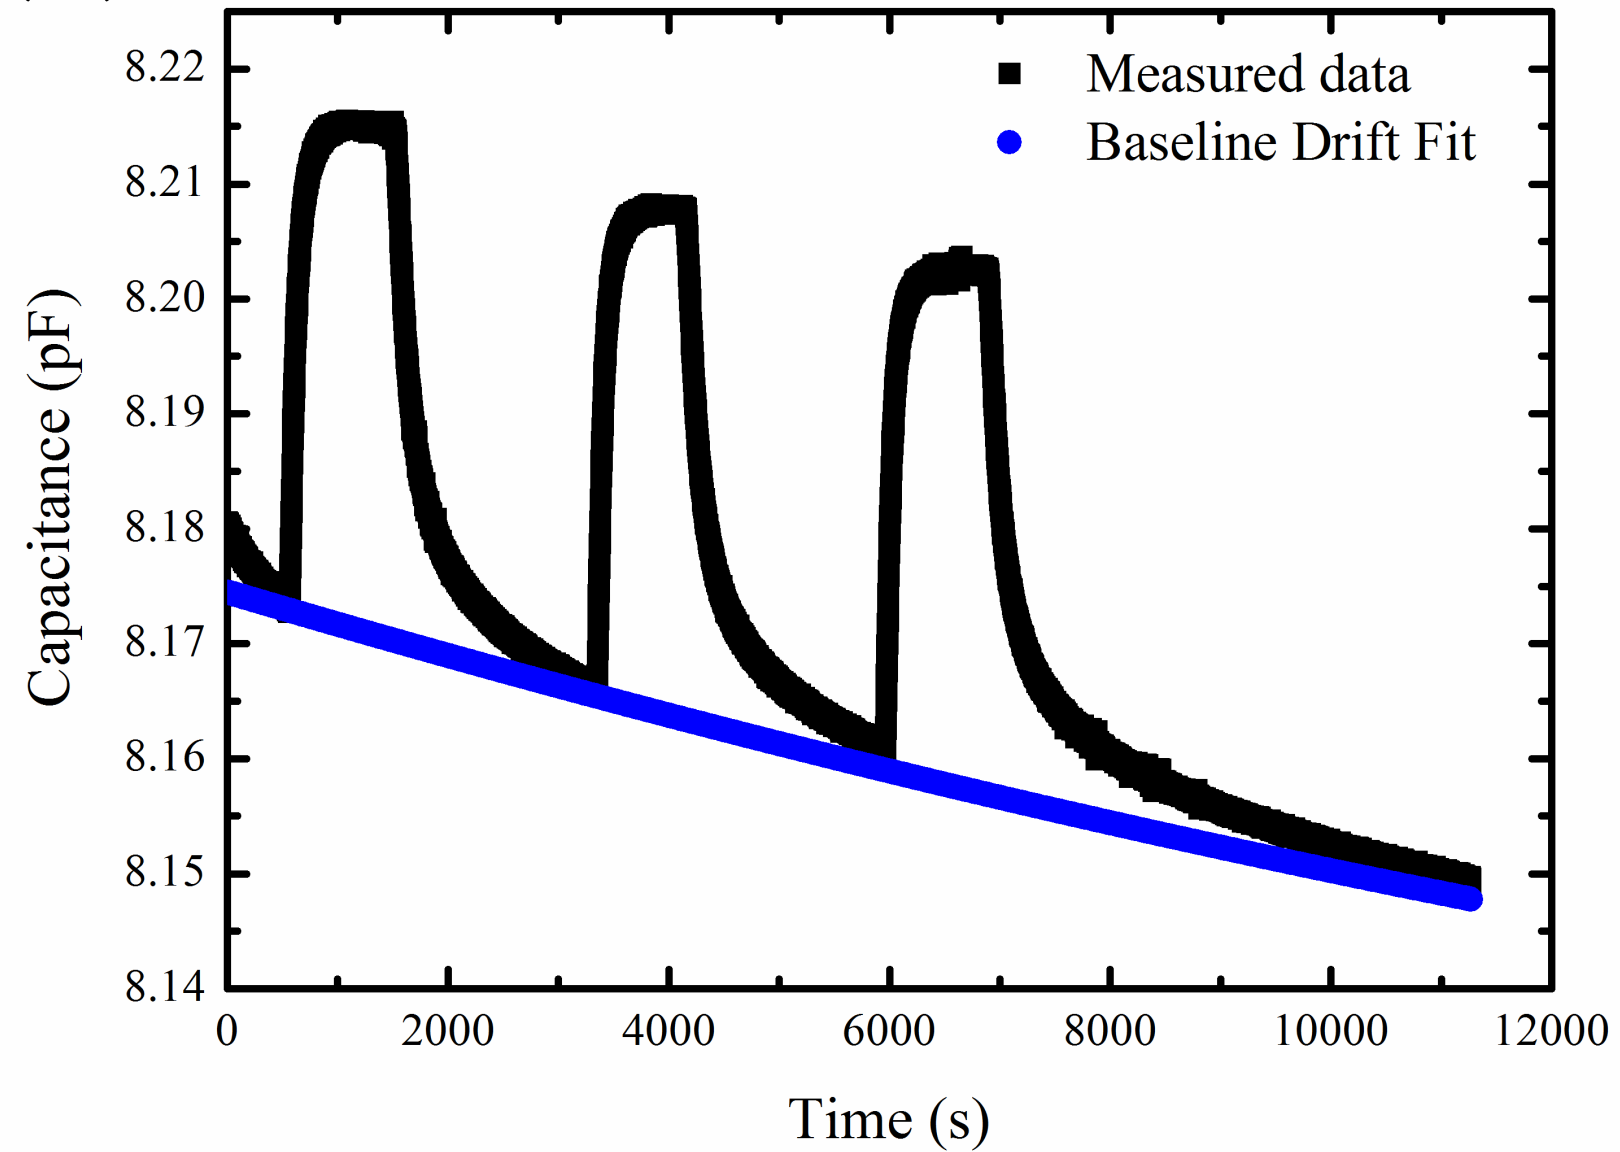**(b)**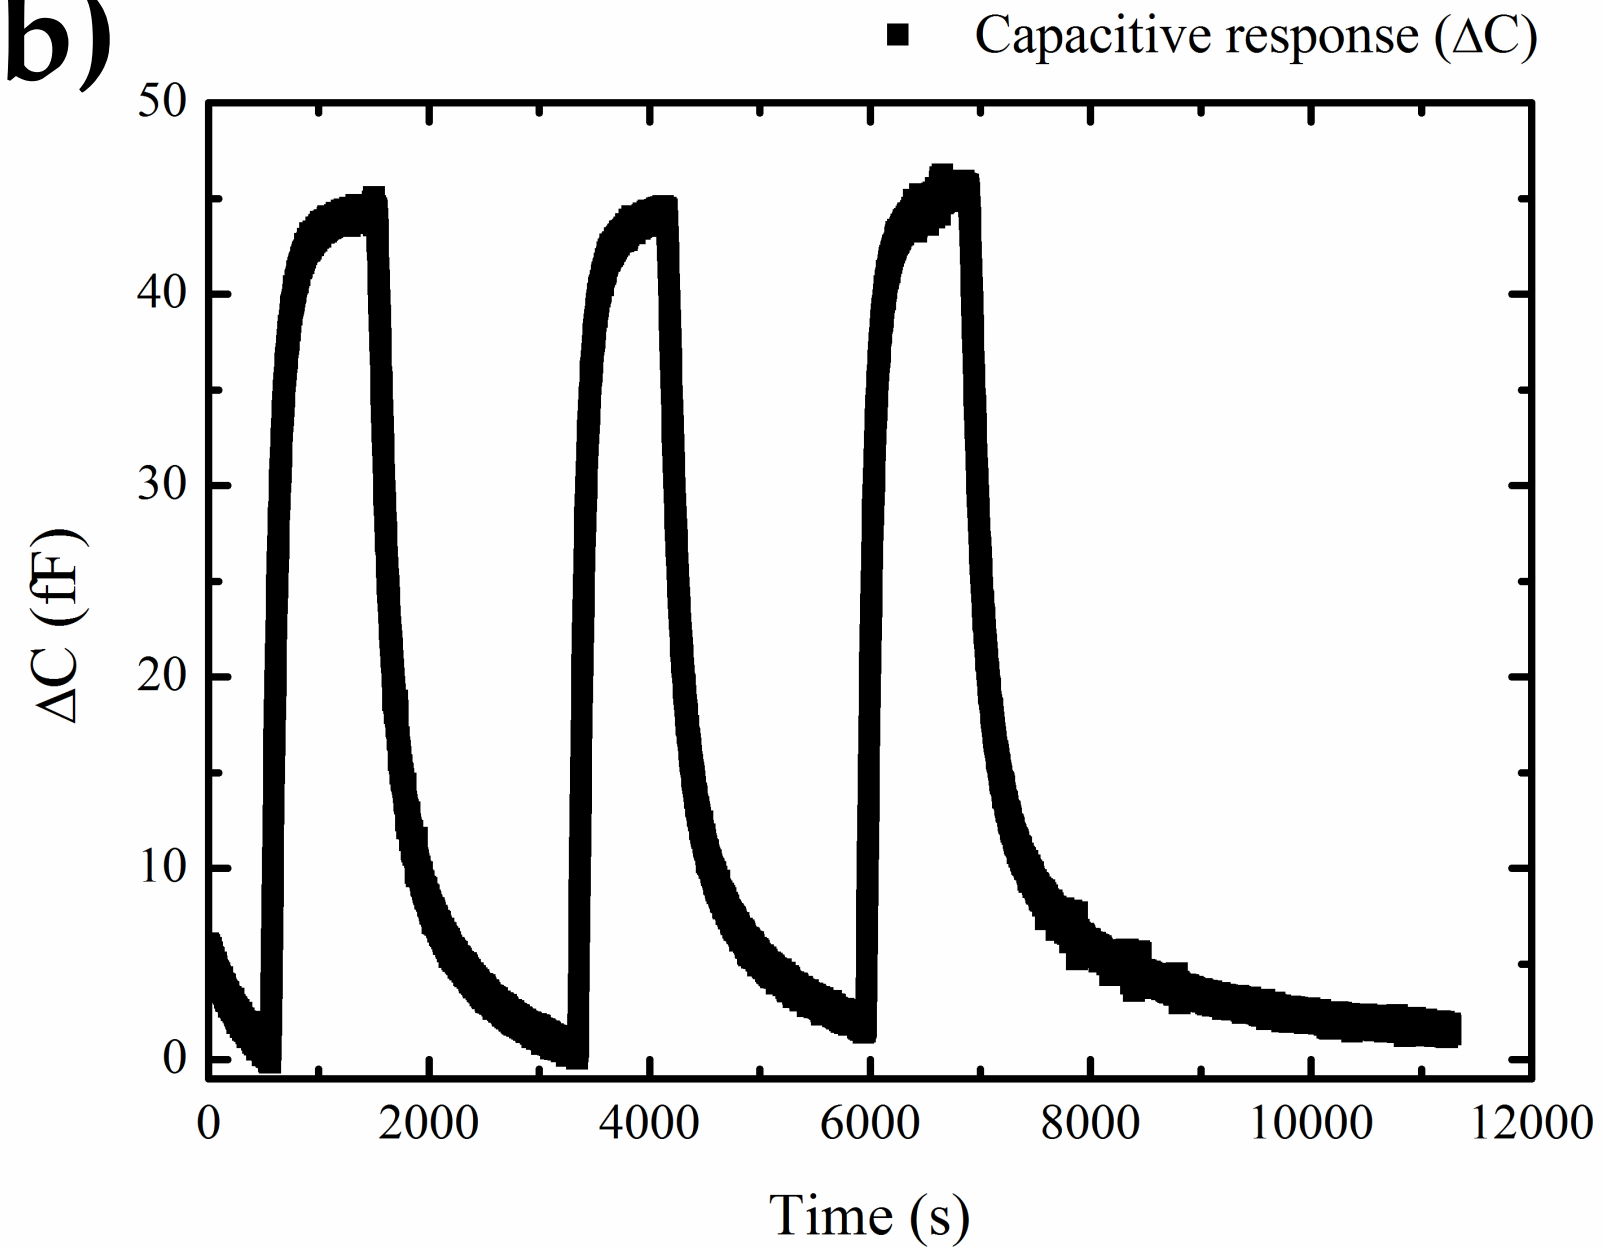

Supplement: s1 [file s1]

**(a)**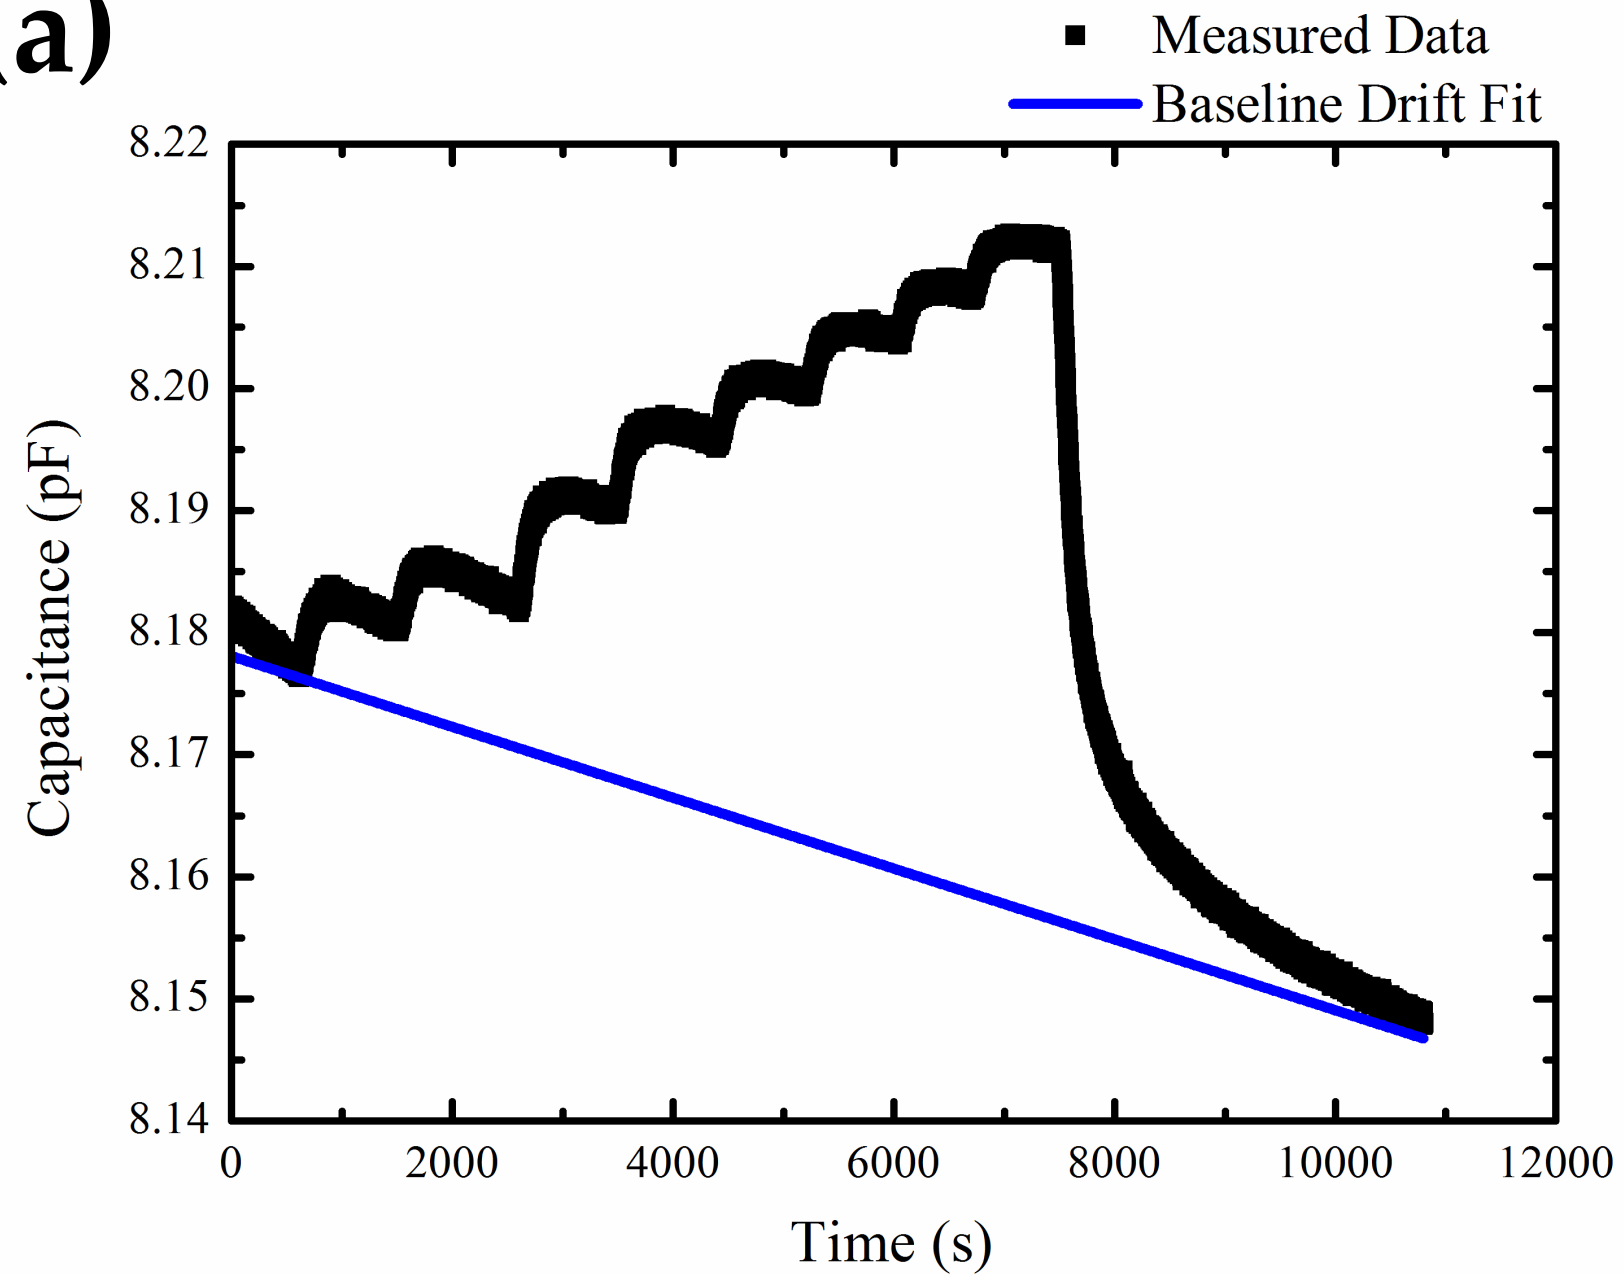**(b)**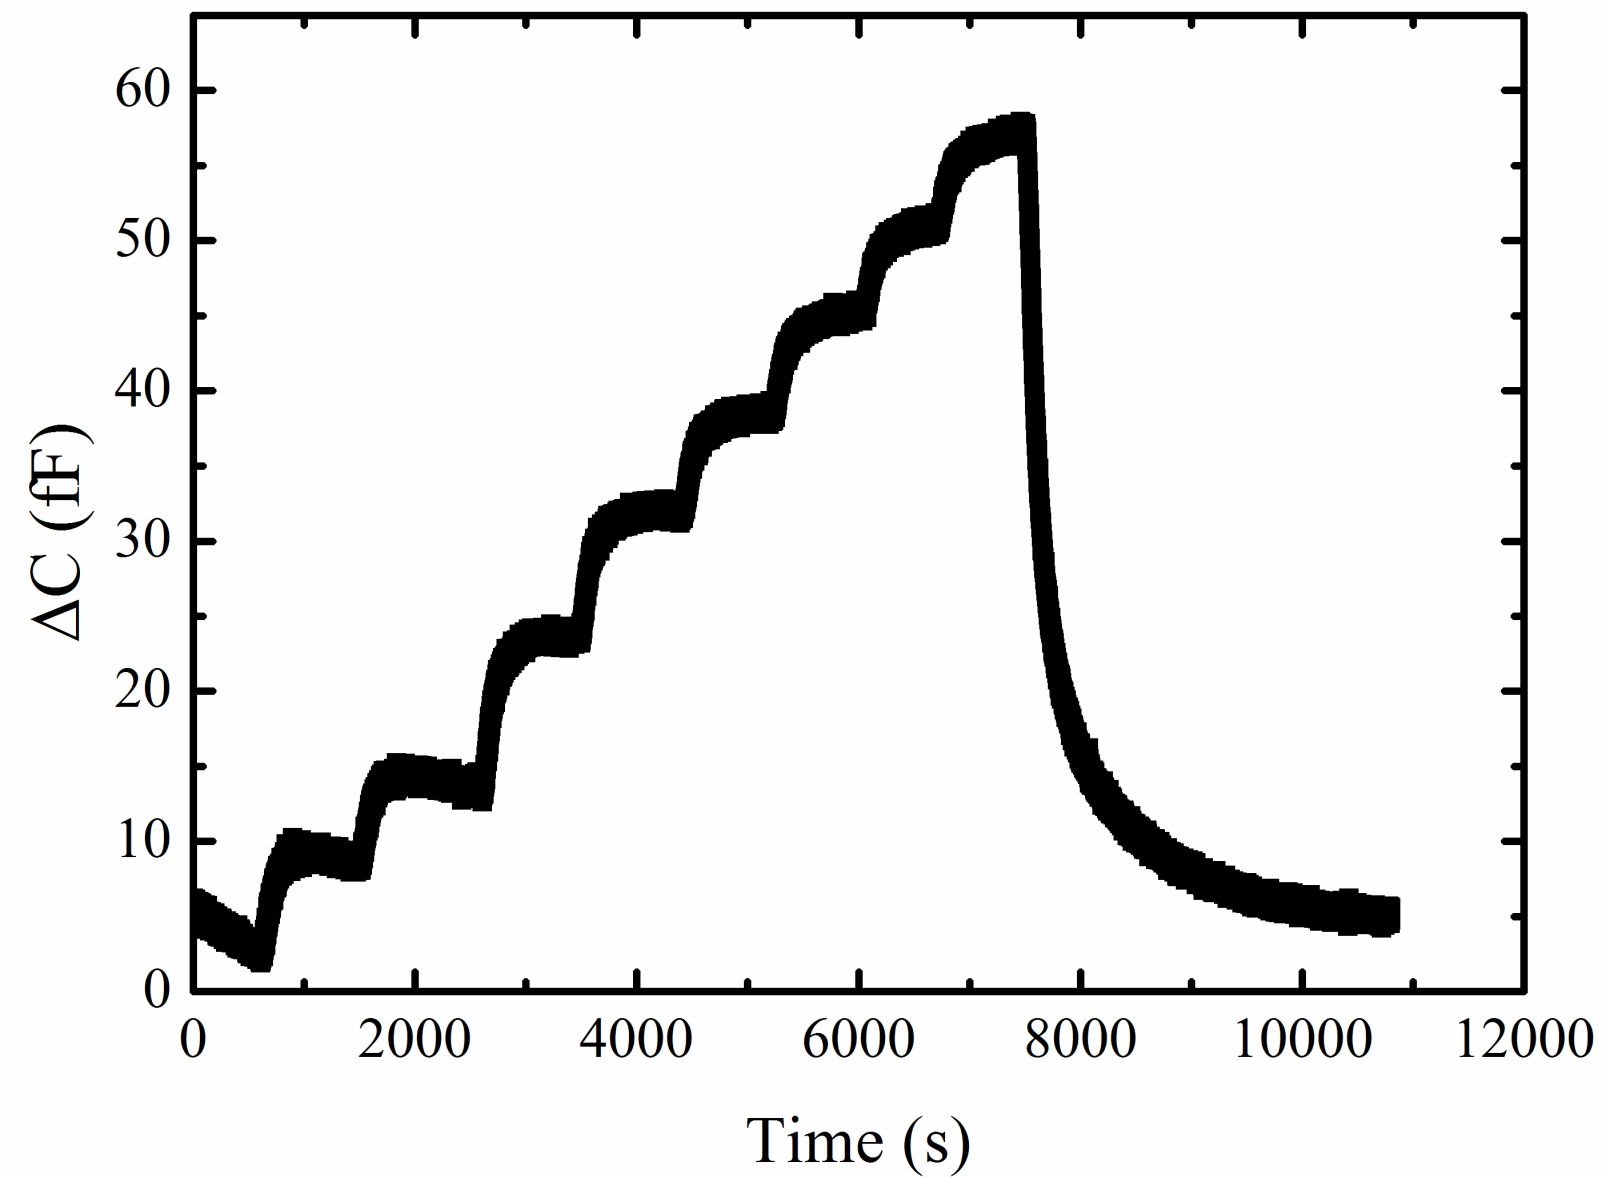

Supplement: s1 [file s1]

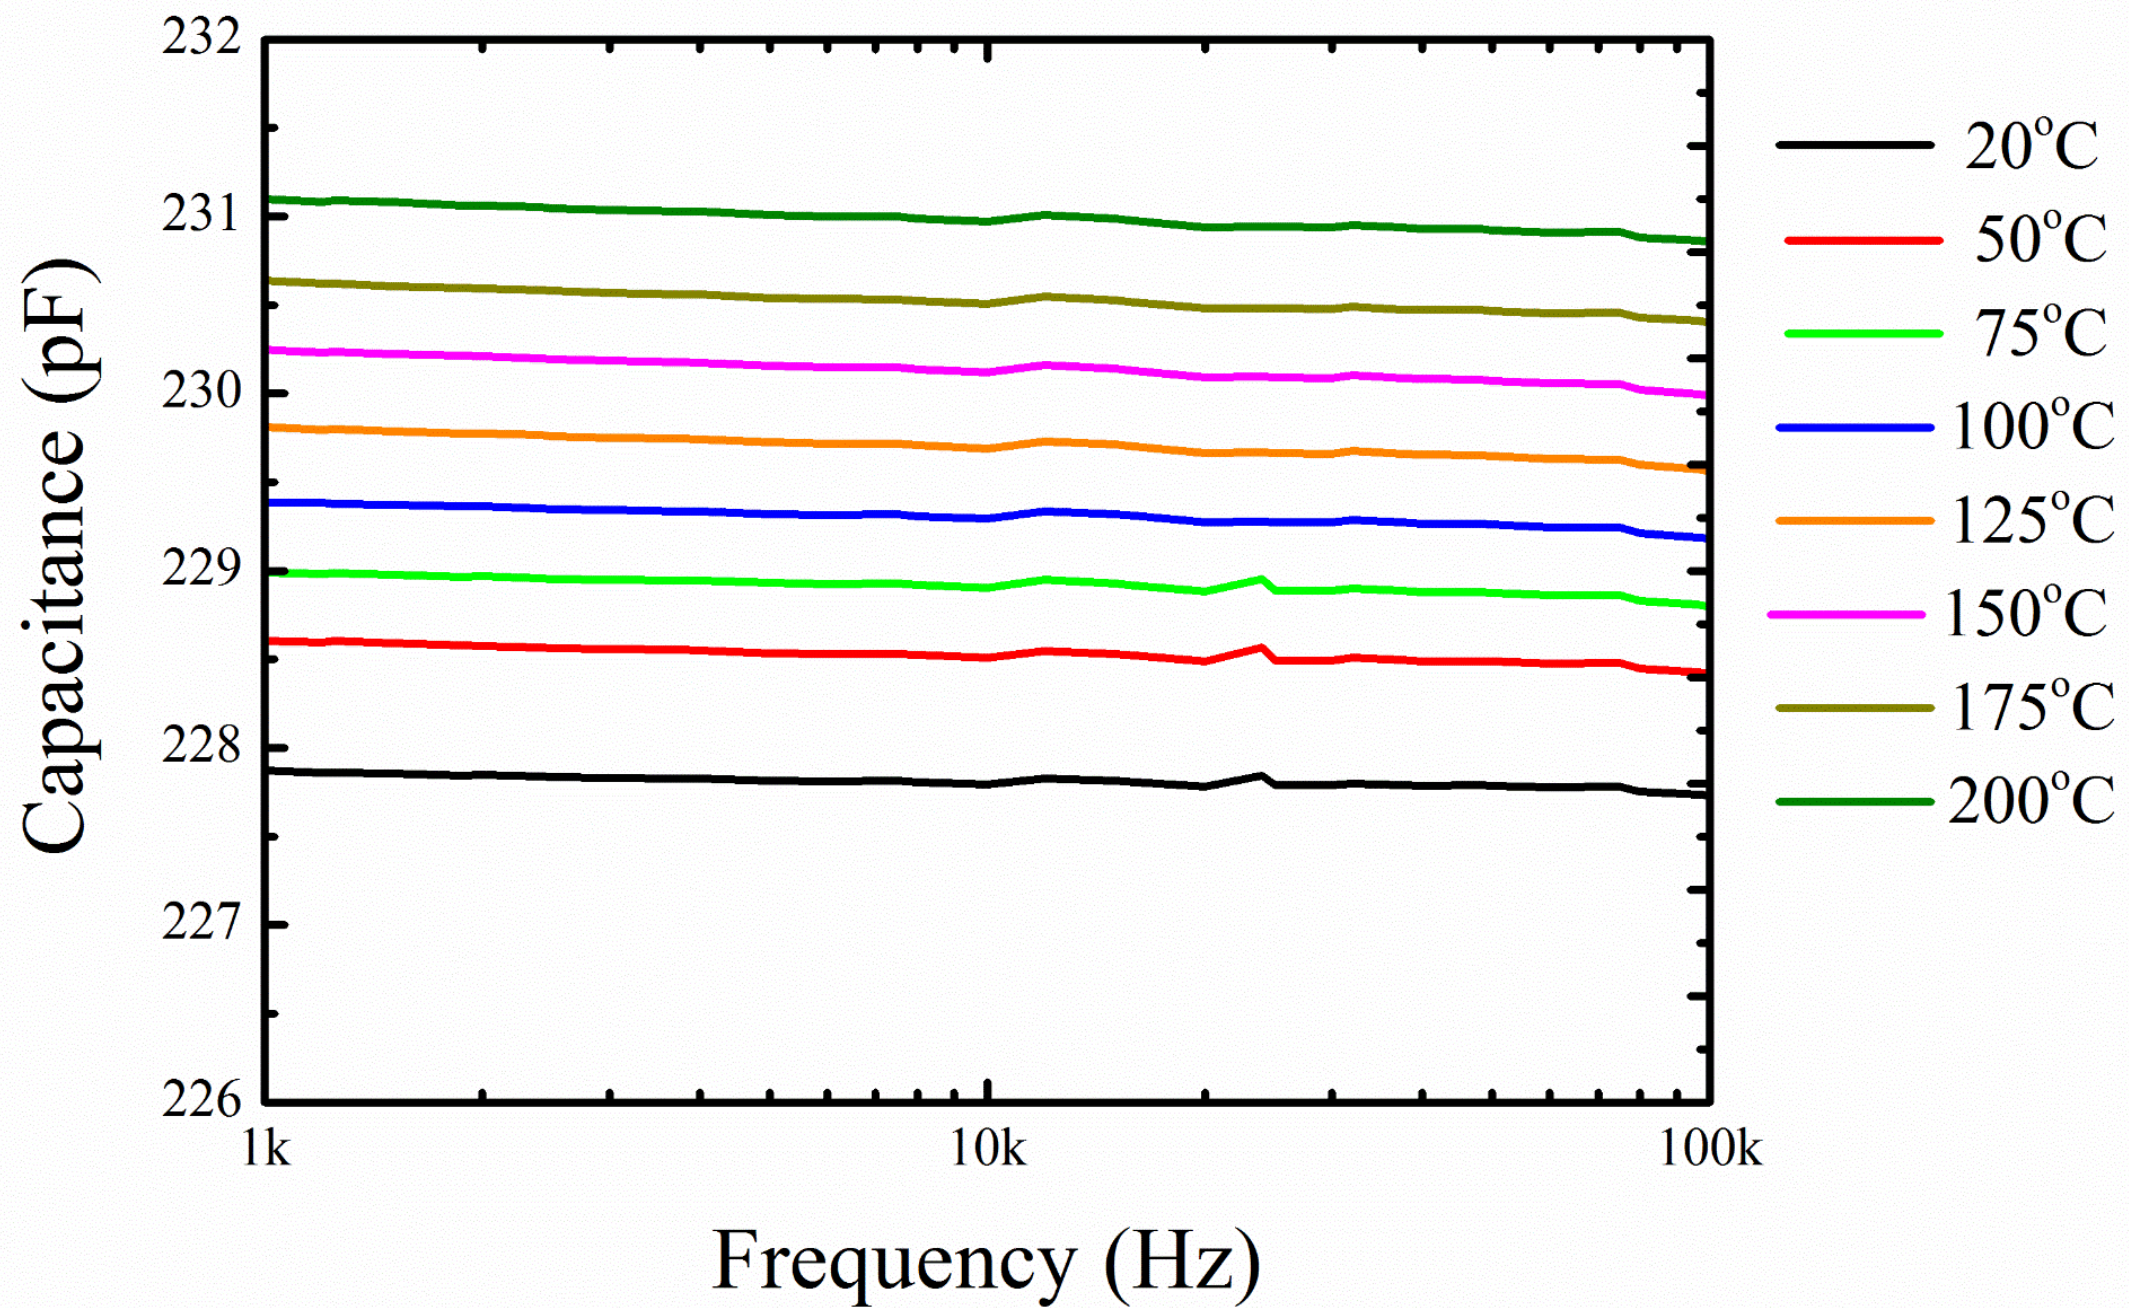

Supplement: s1 [file s1]

(a)

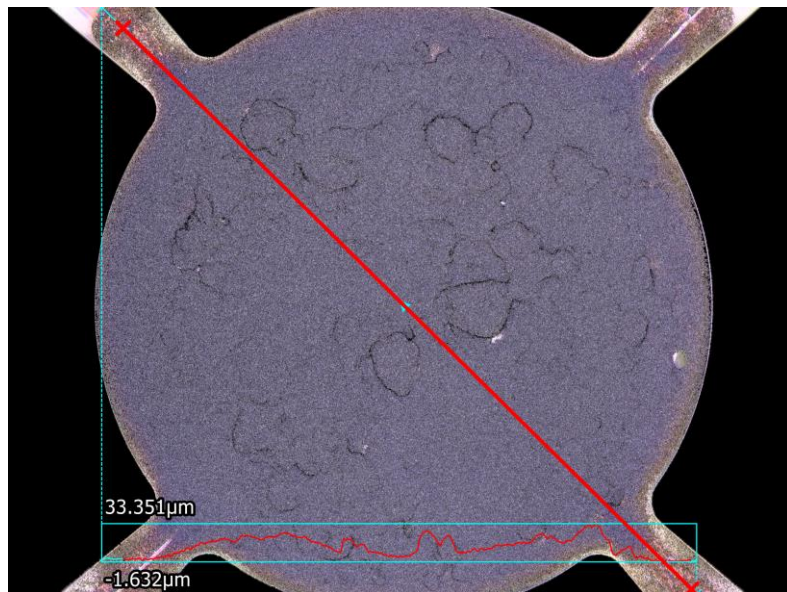

(b)

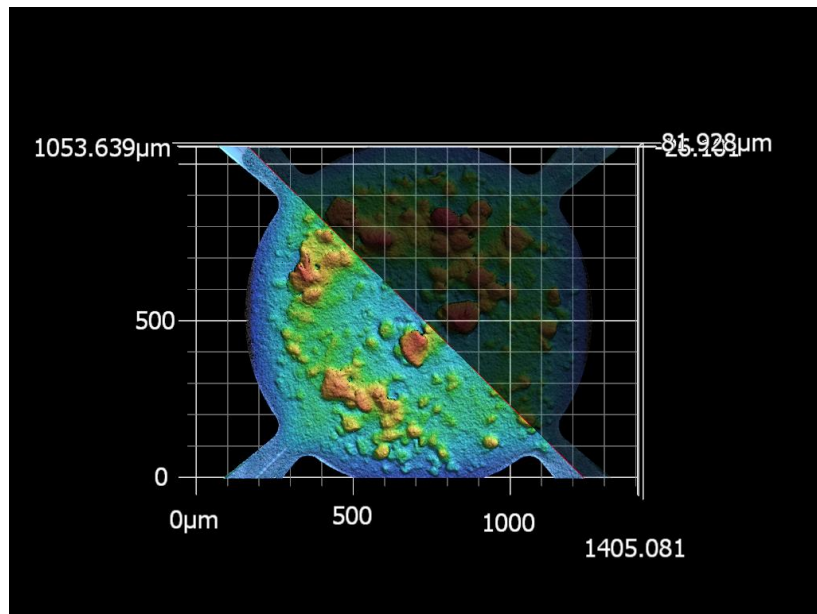

(c)

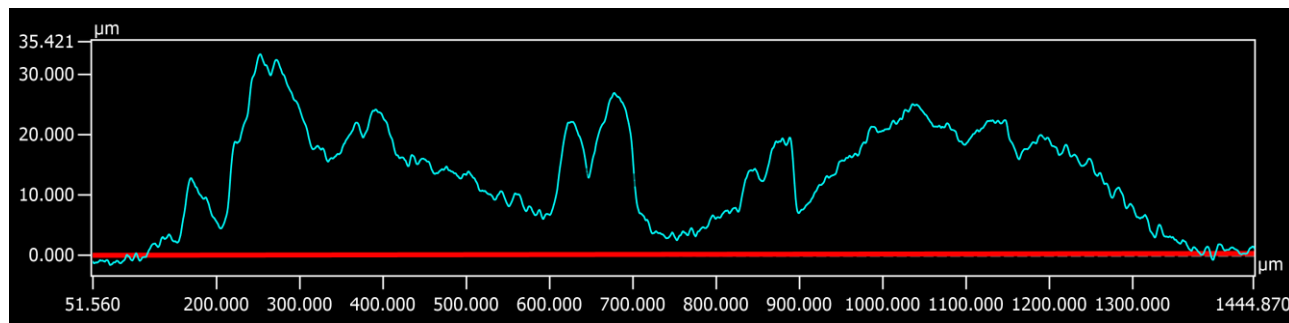

Supplement: s1 [file s1]

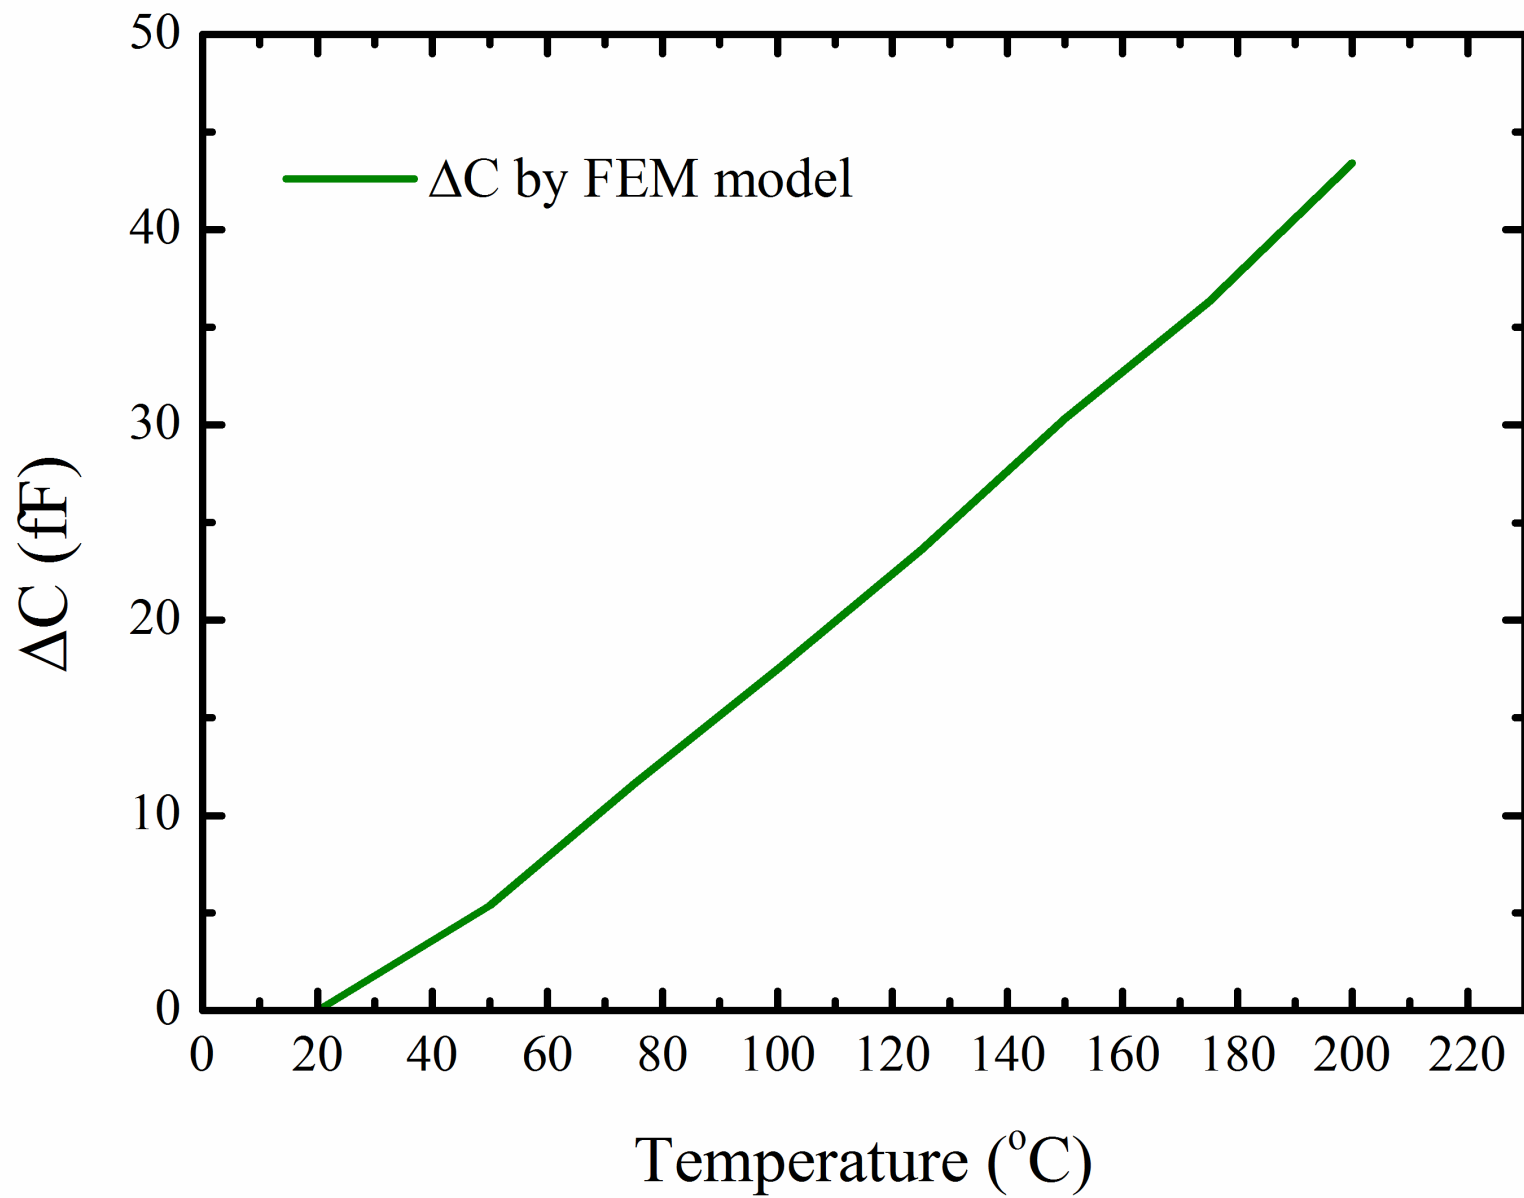

Supplement: s1 [file s1]

**(a)**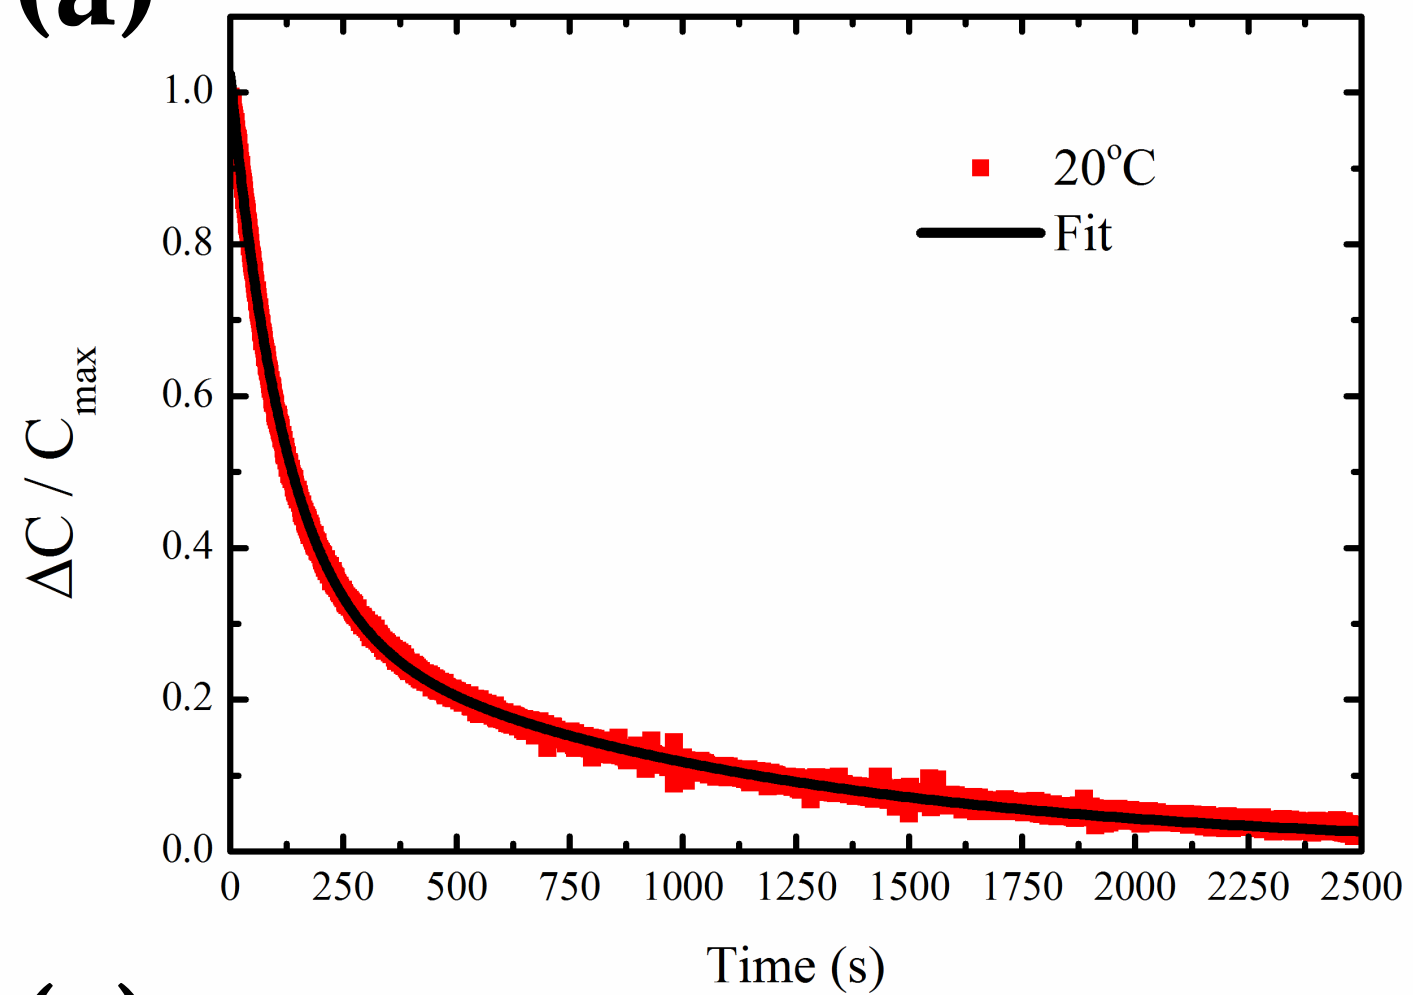**(b)**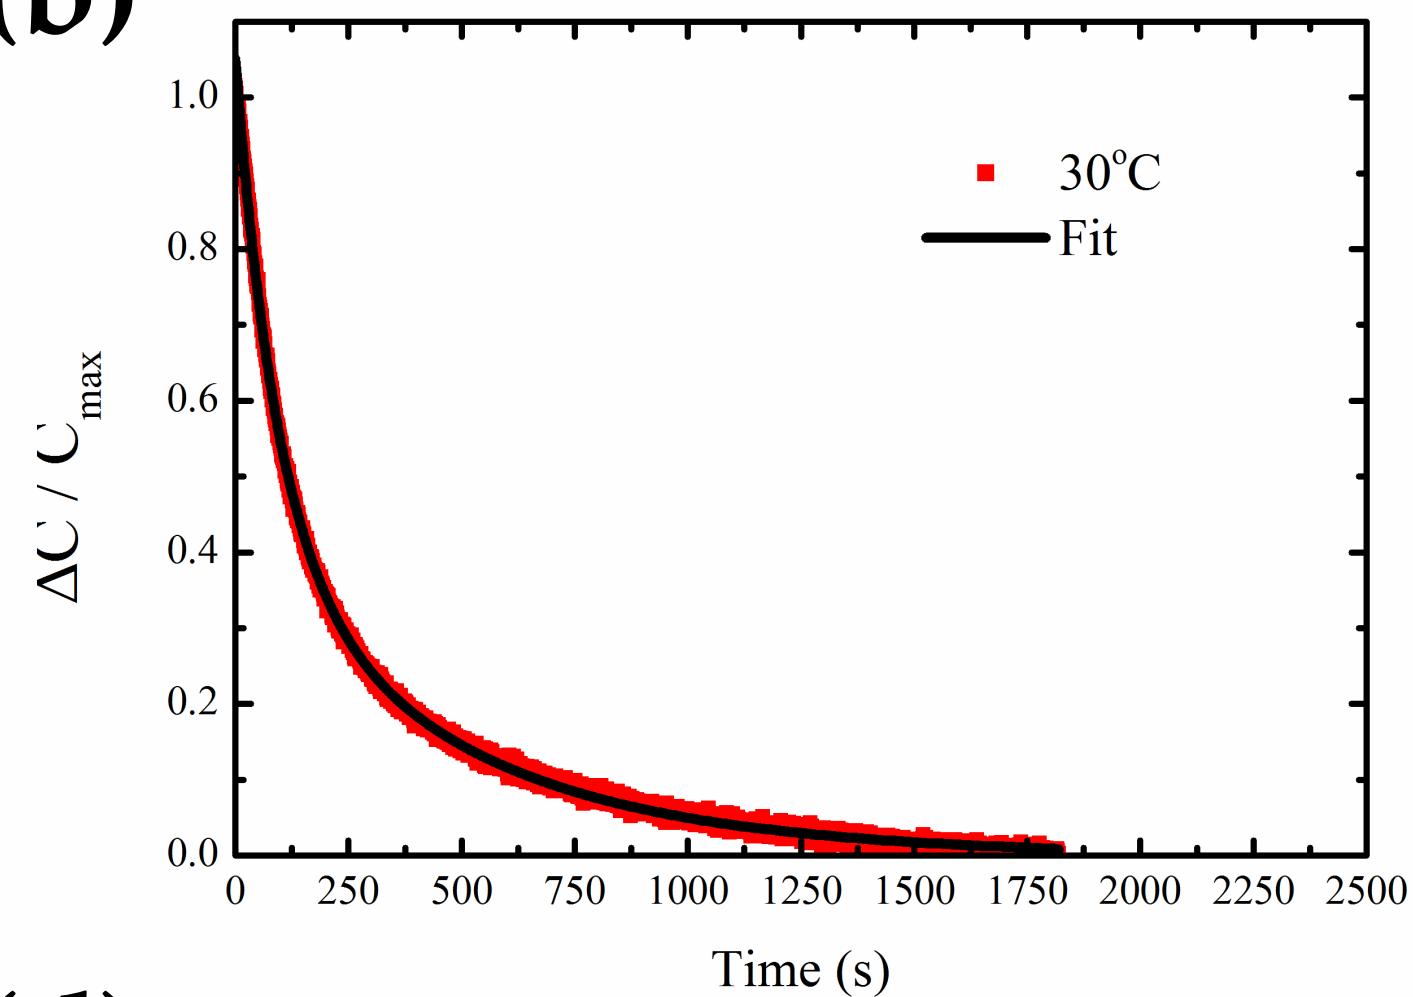**(c)**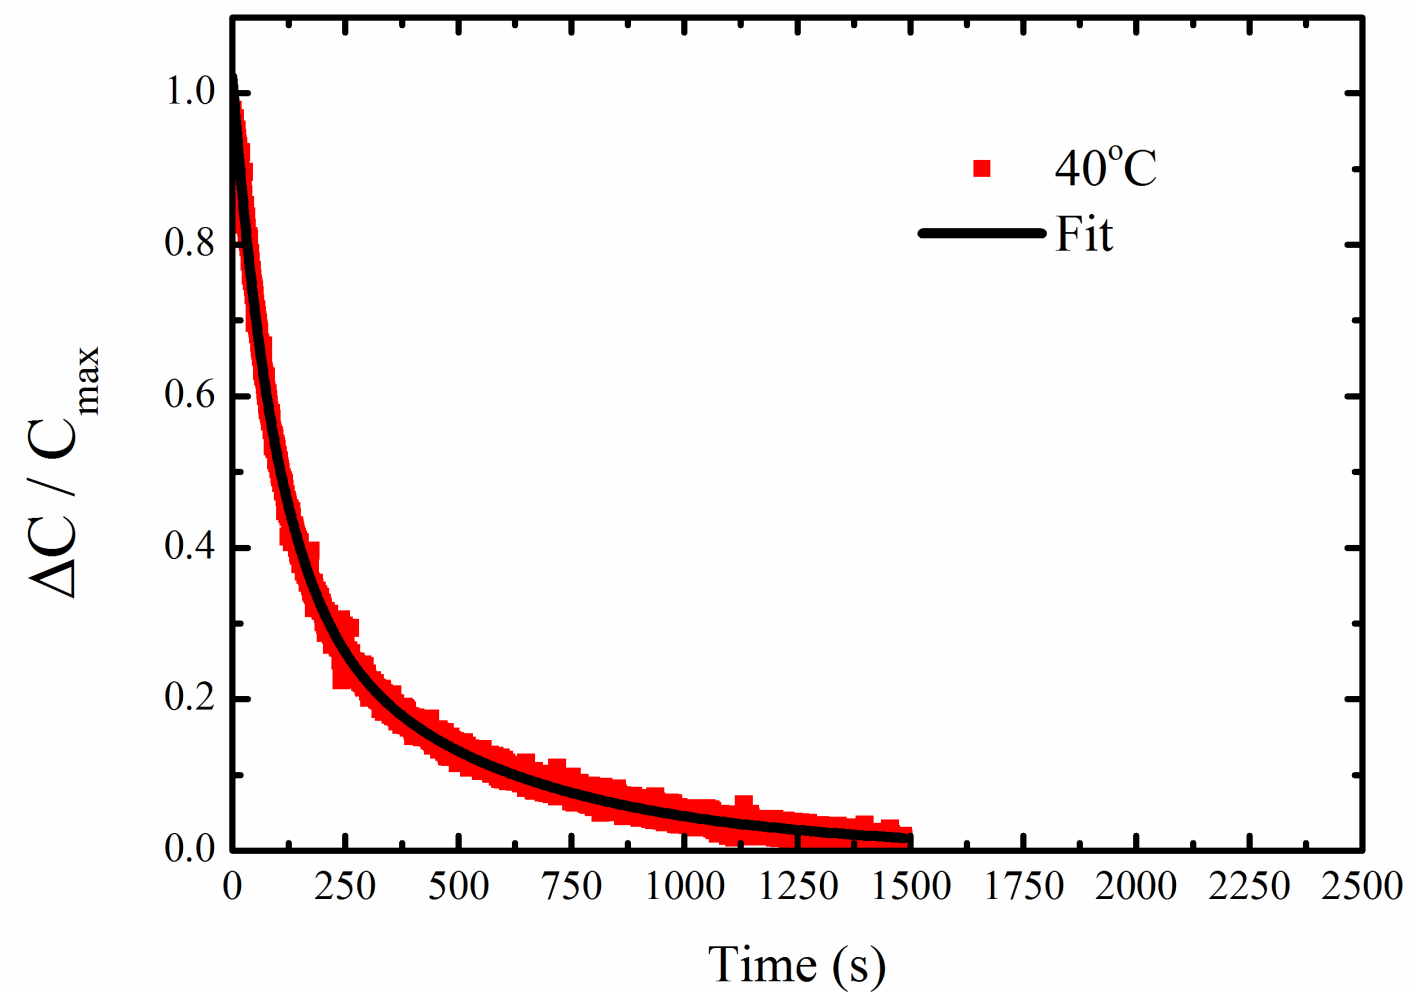**(d)**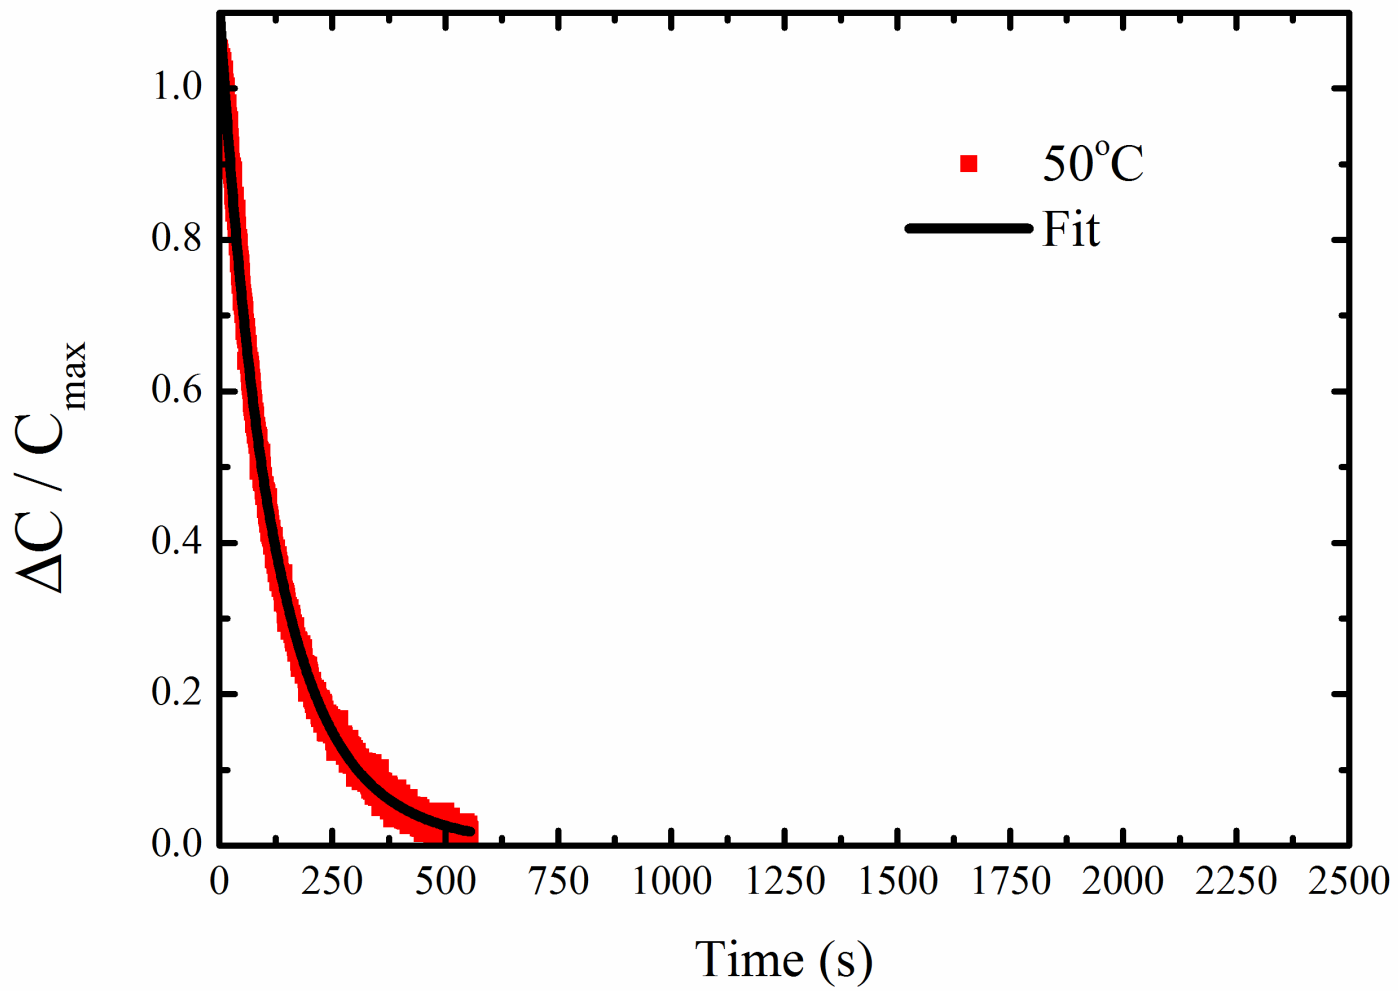

Supplement: s1 [file s1]

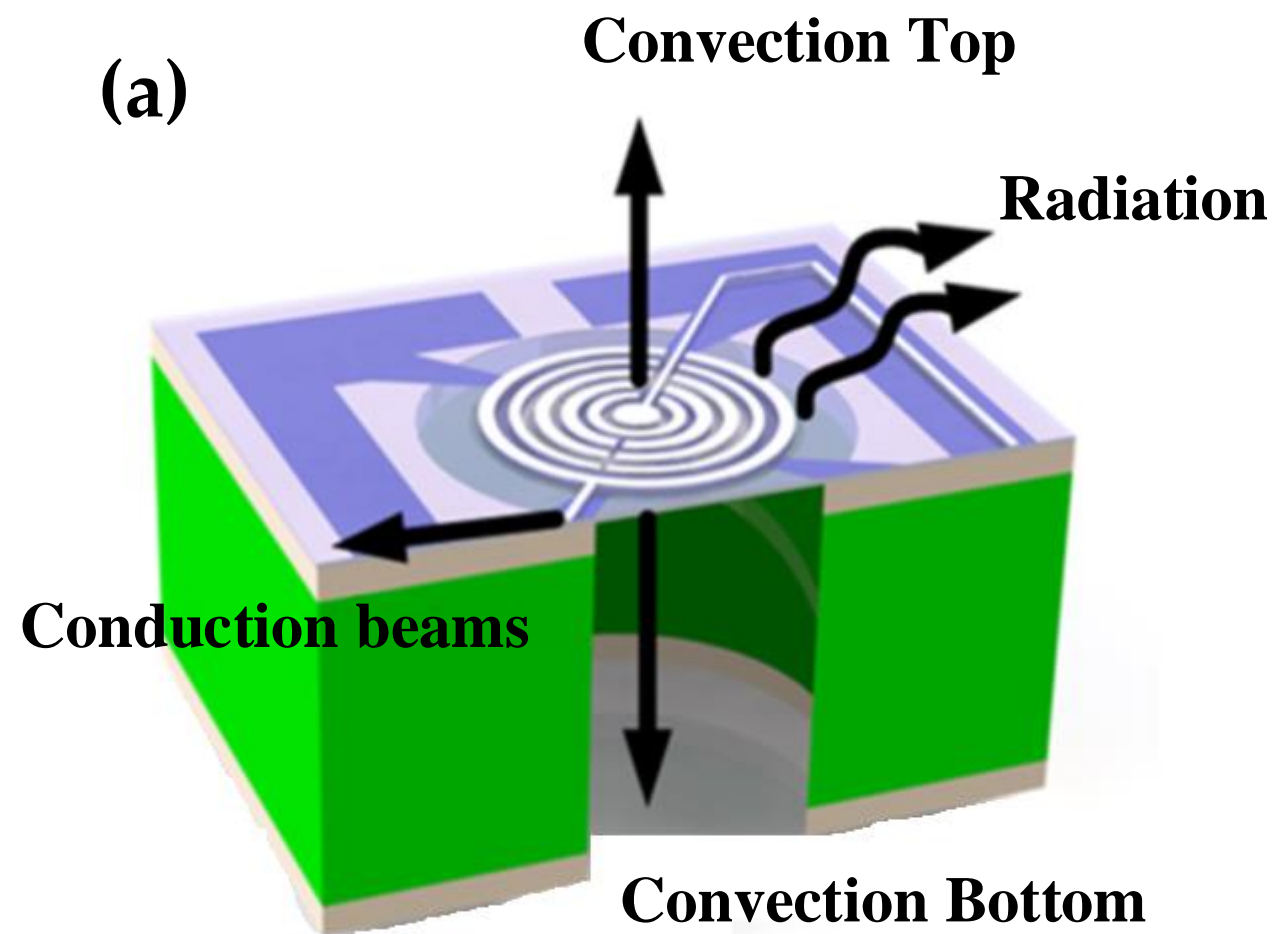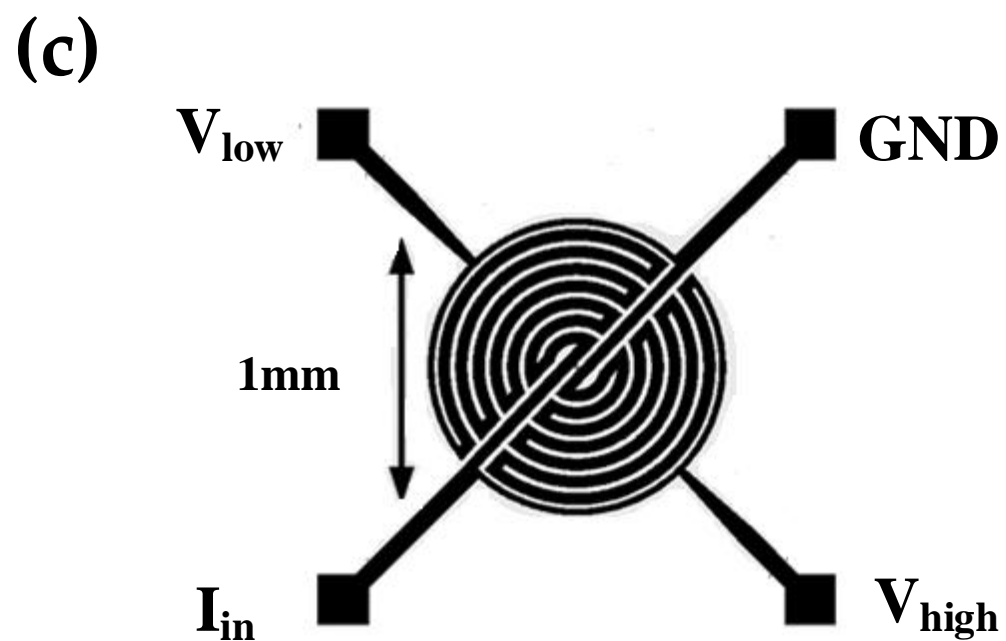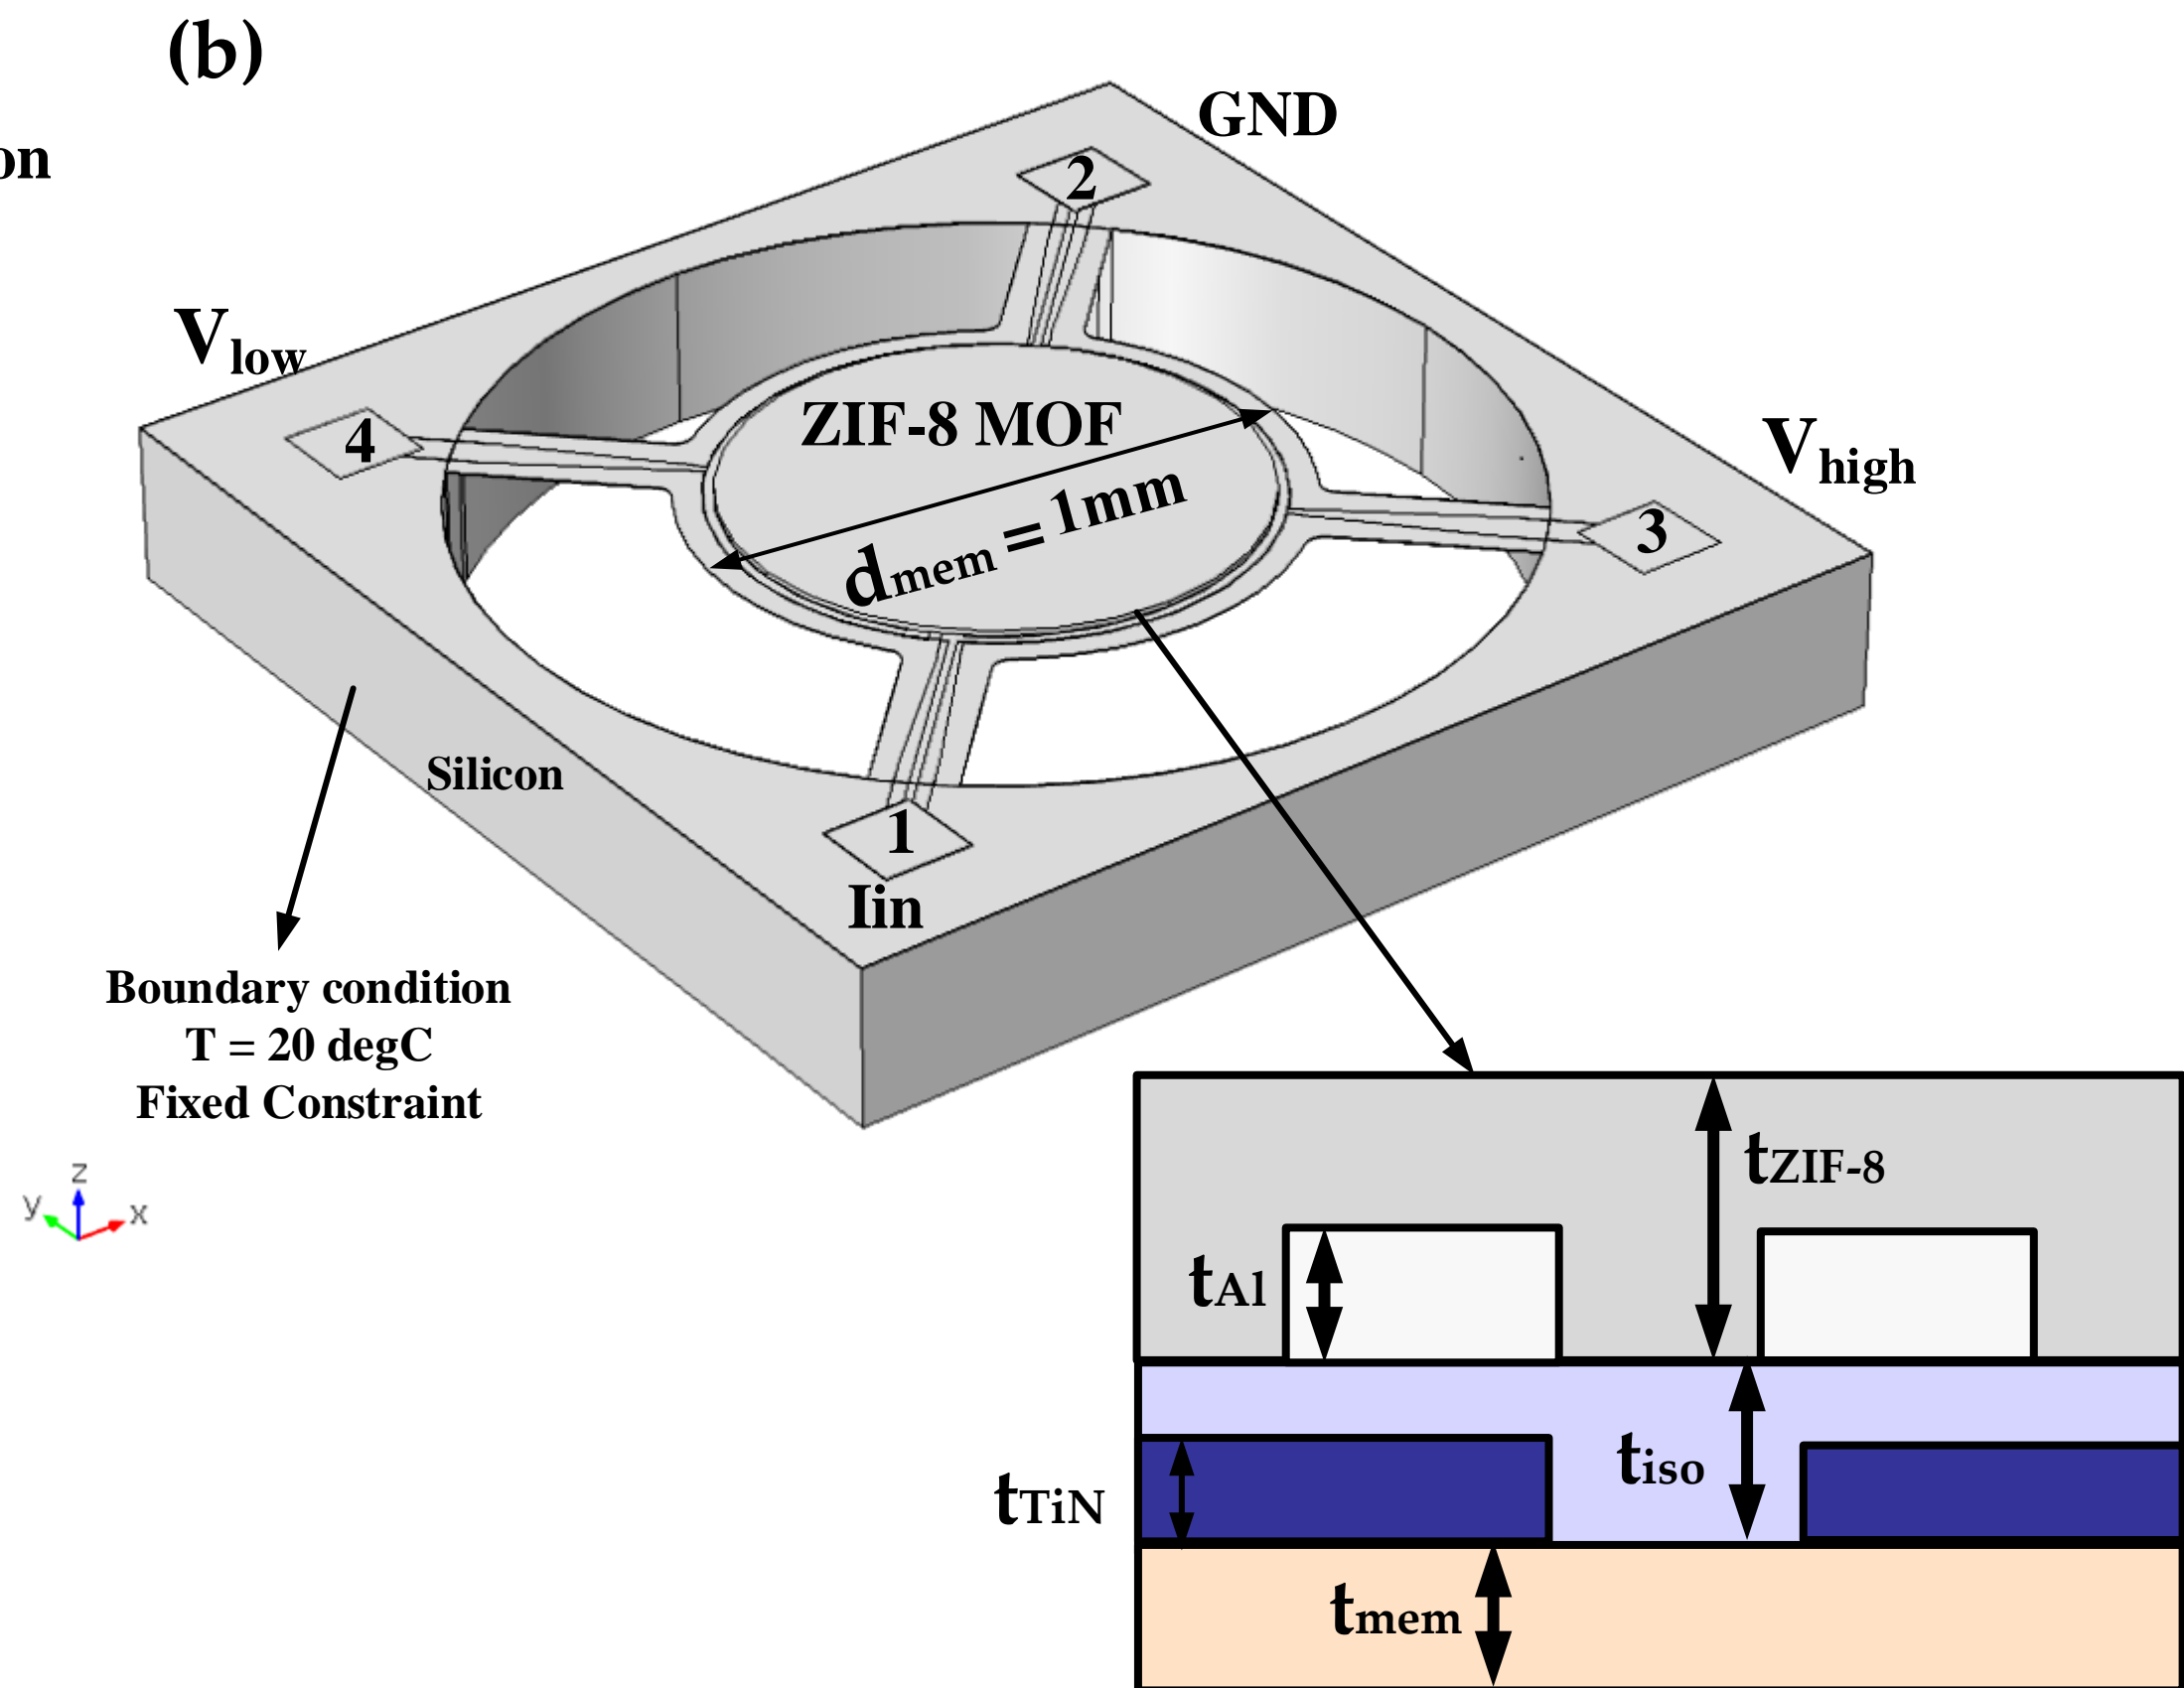

Supplement: s1 [file s1]

■ Capacitive response ( $\Delta C$ )

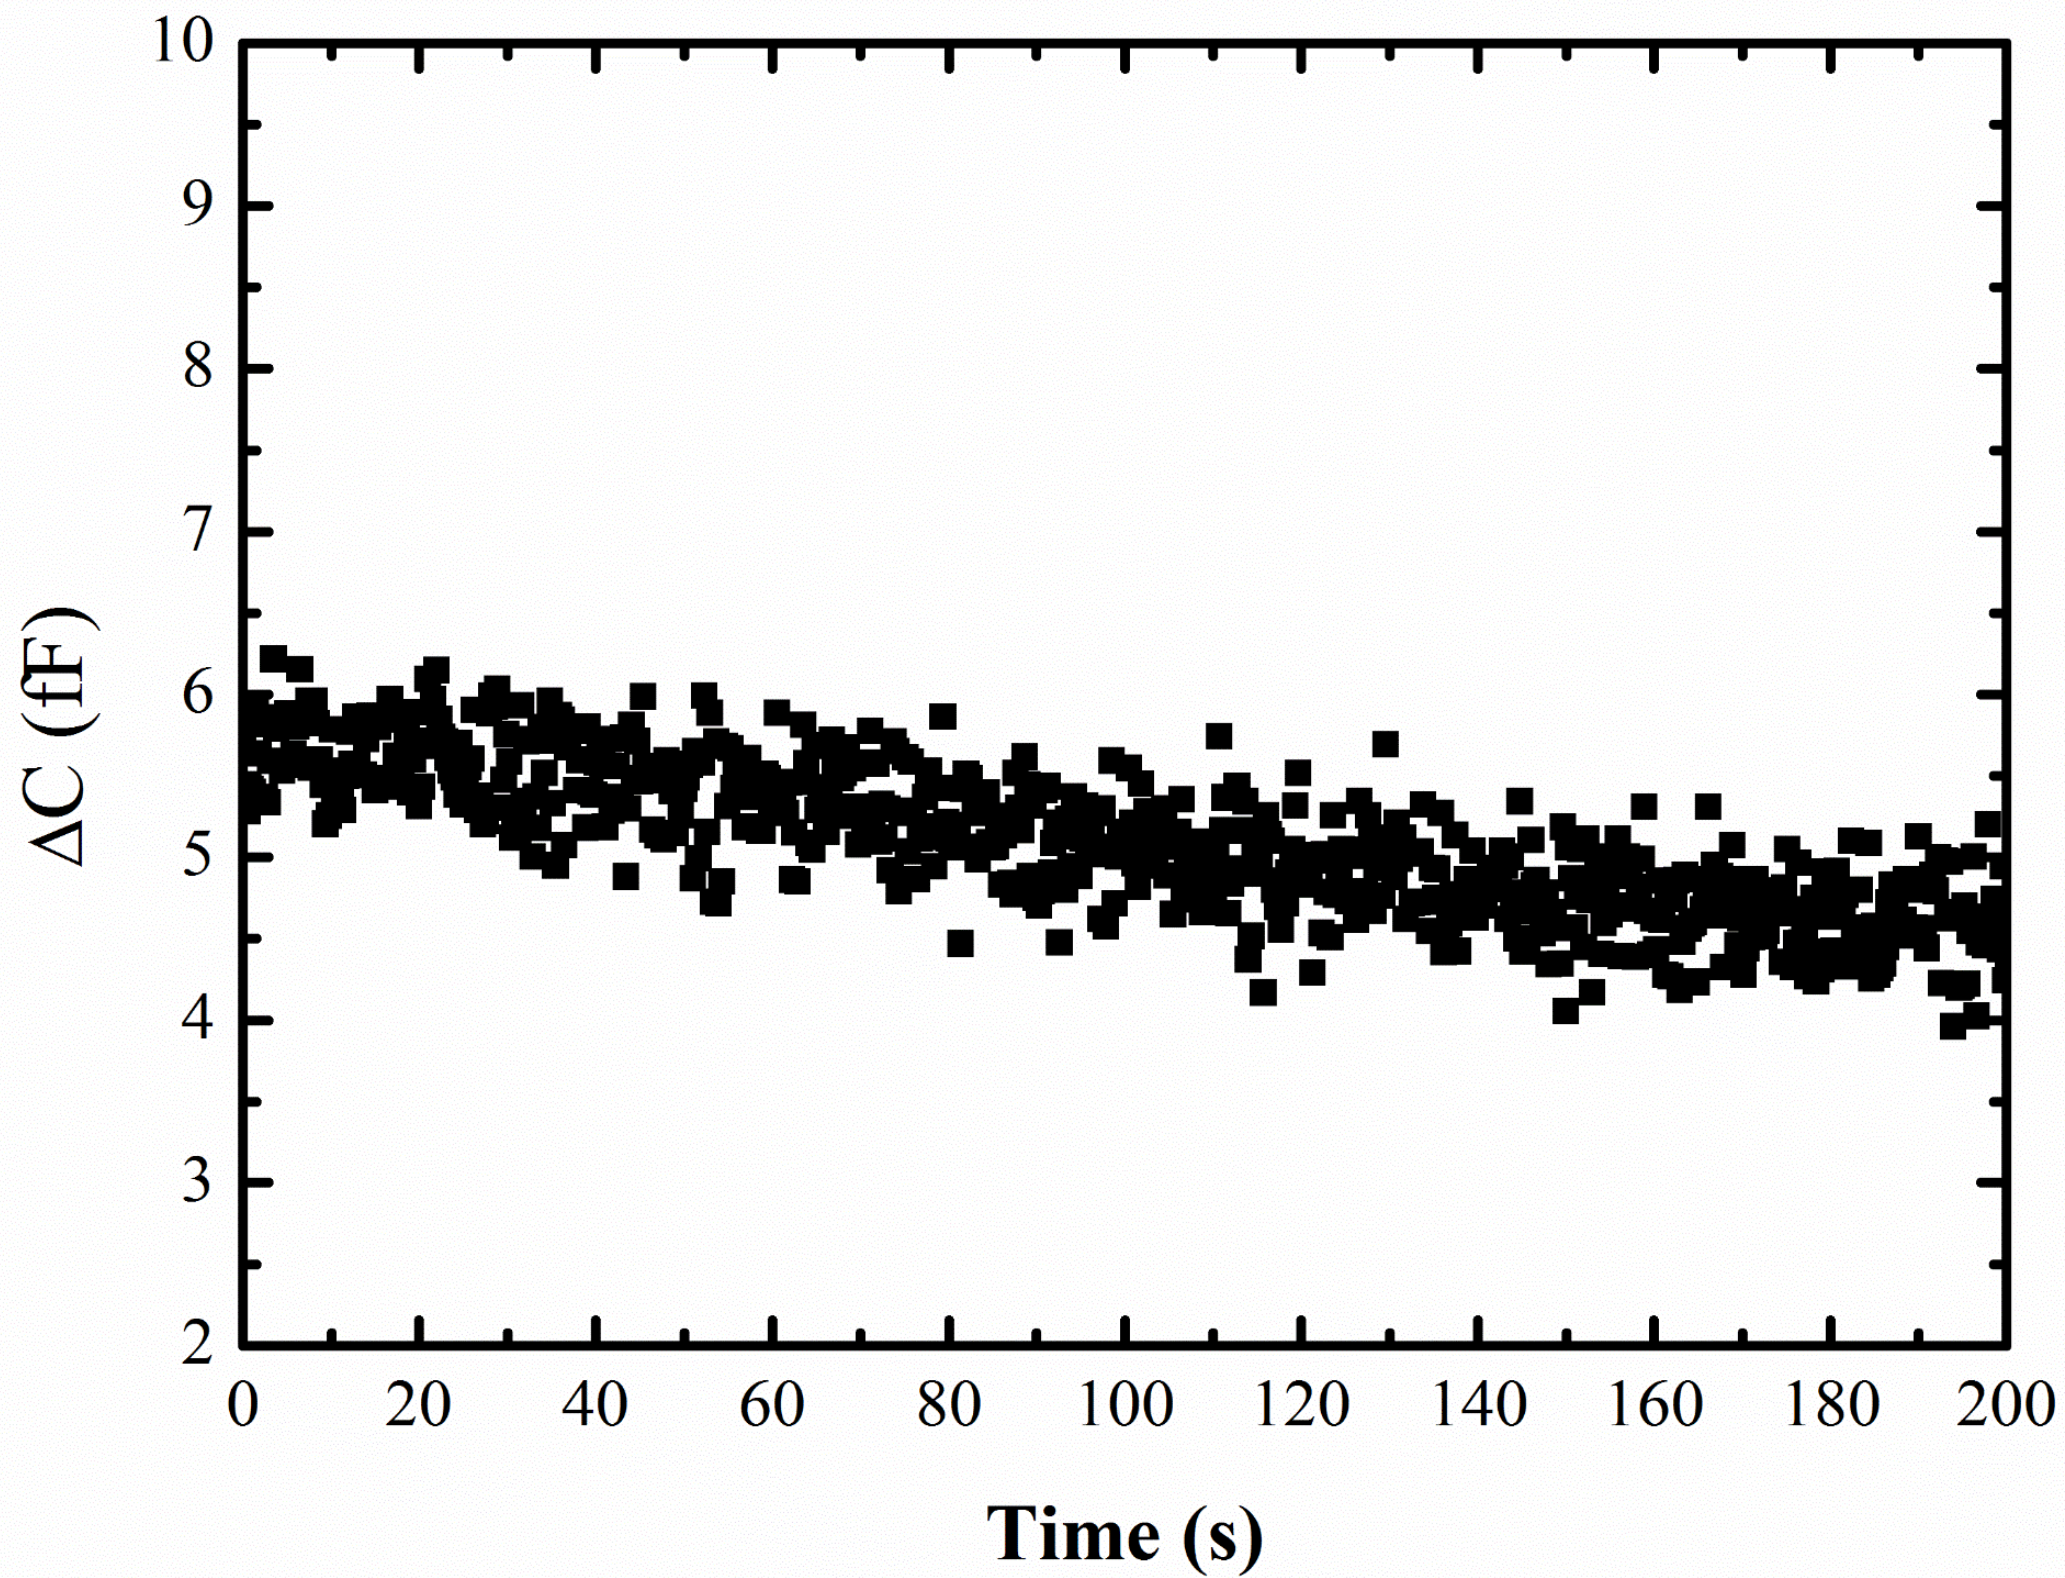

Supplement: s1 [file s1]

(a)

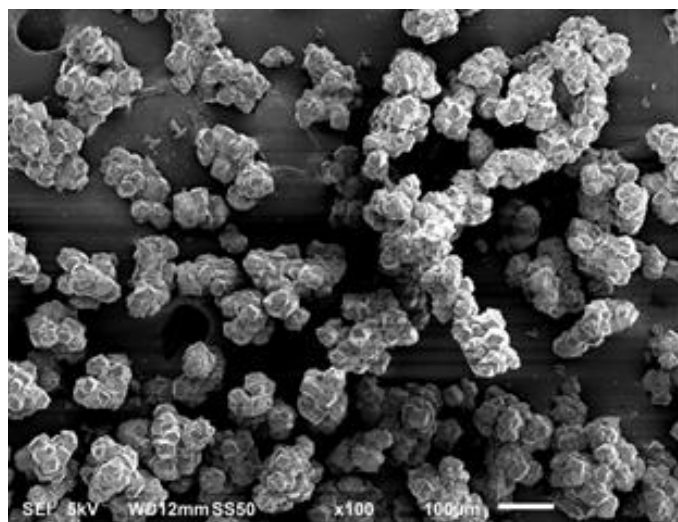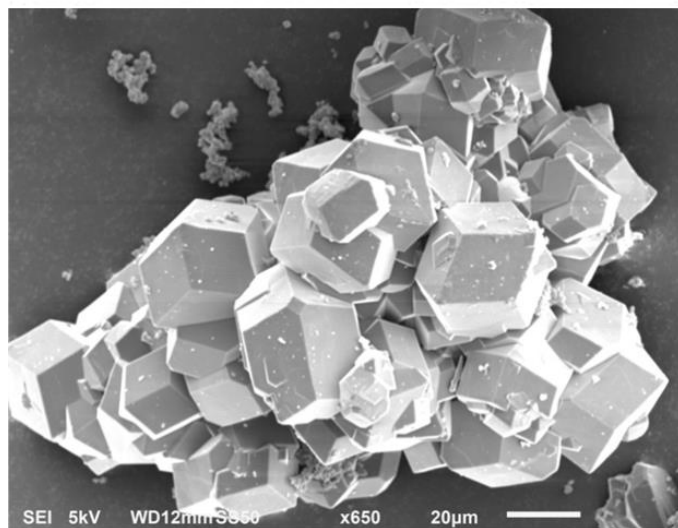

(b)

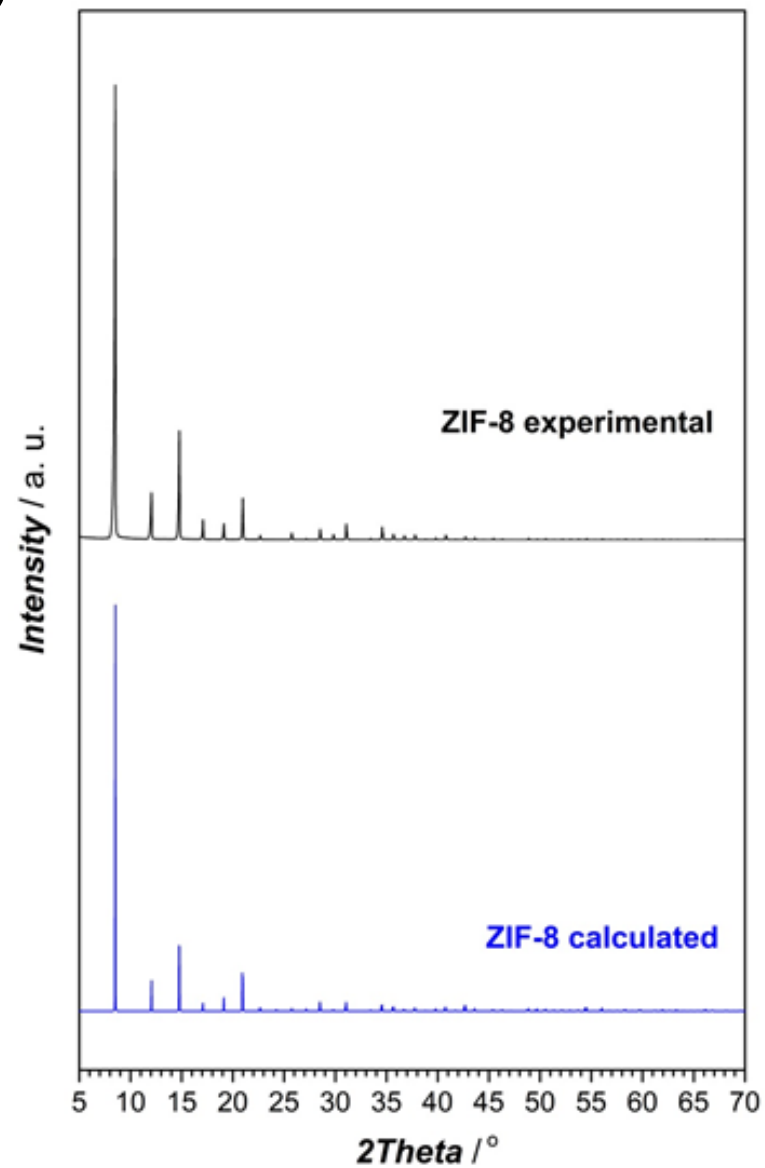

Supplement: s1 [file s1]

(a)

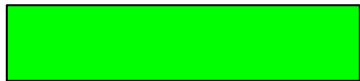

(b)

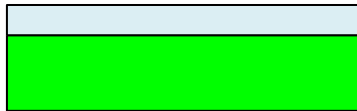

(c)

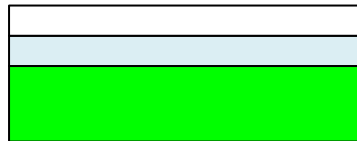

(d)

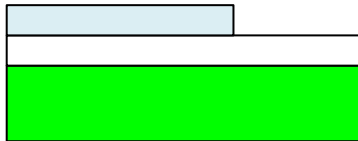

(e)

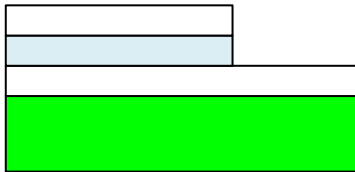

(f)

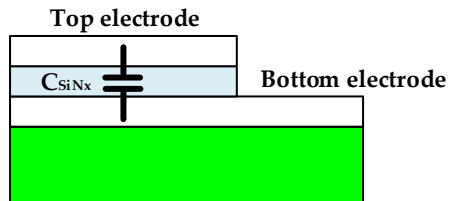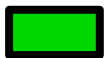

Si

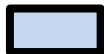

PECVD  $\text{SiN}_x$

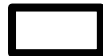

Al

Supplement: s1 [file s1]

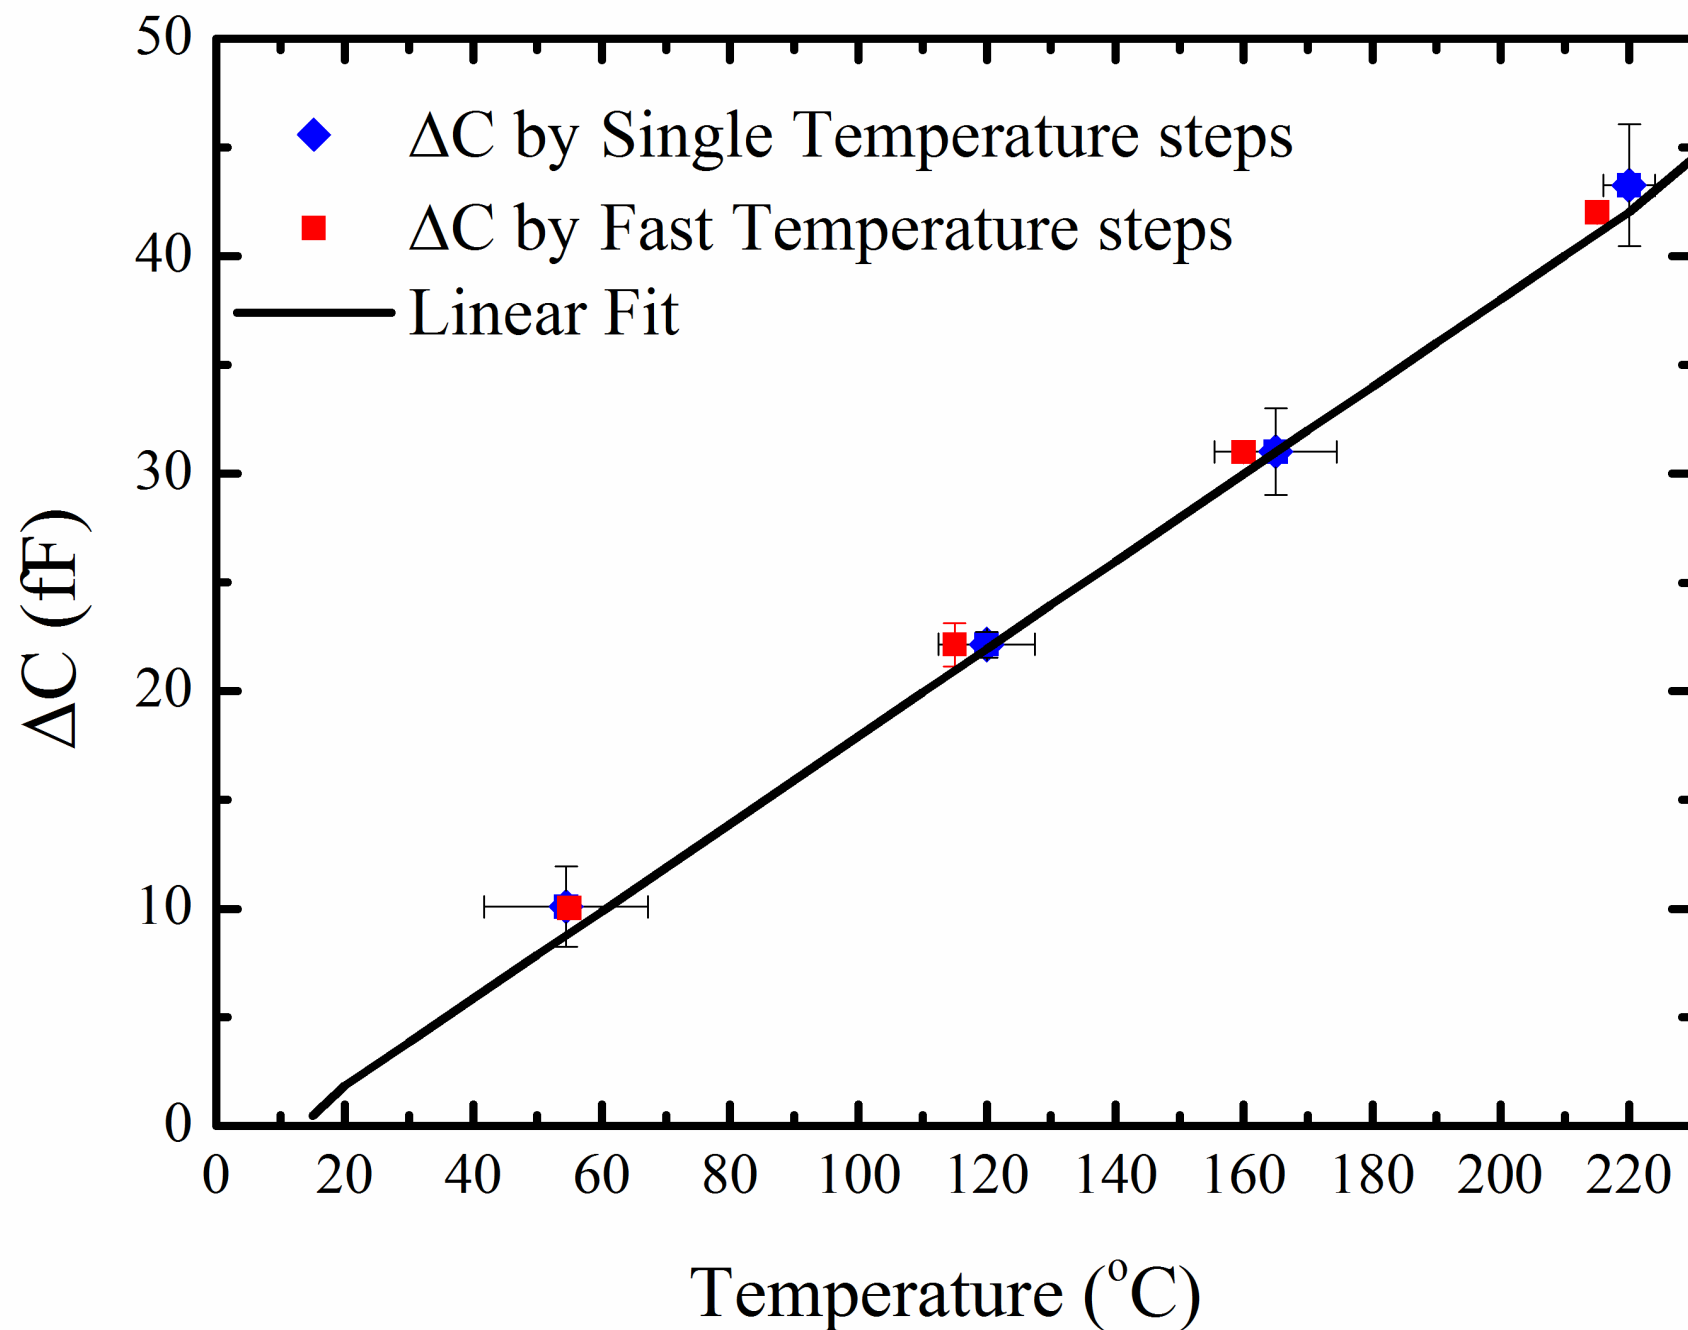

Supplement: s1 [file s1]

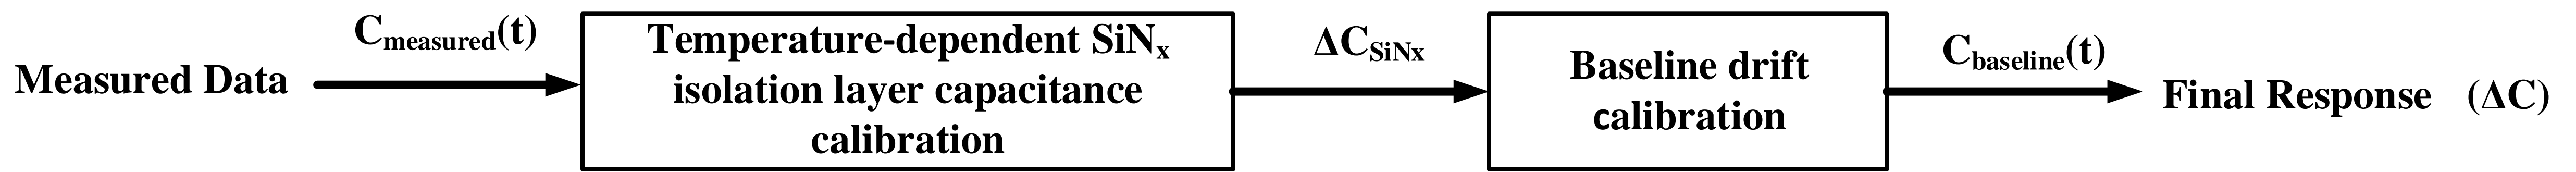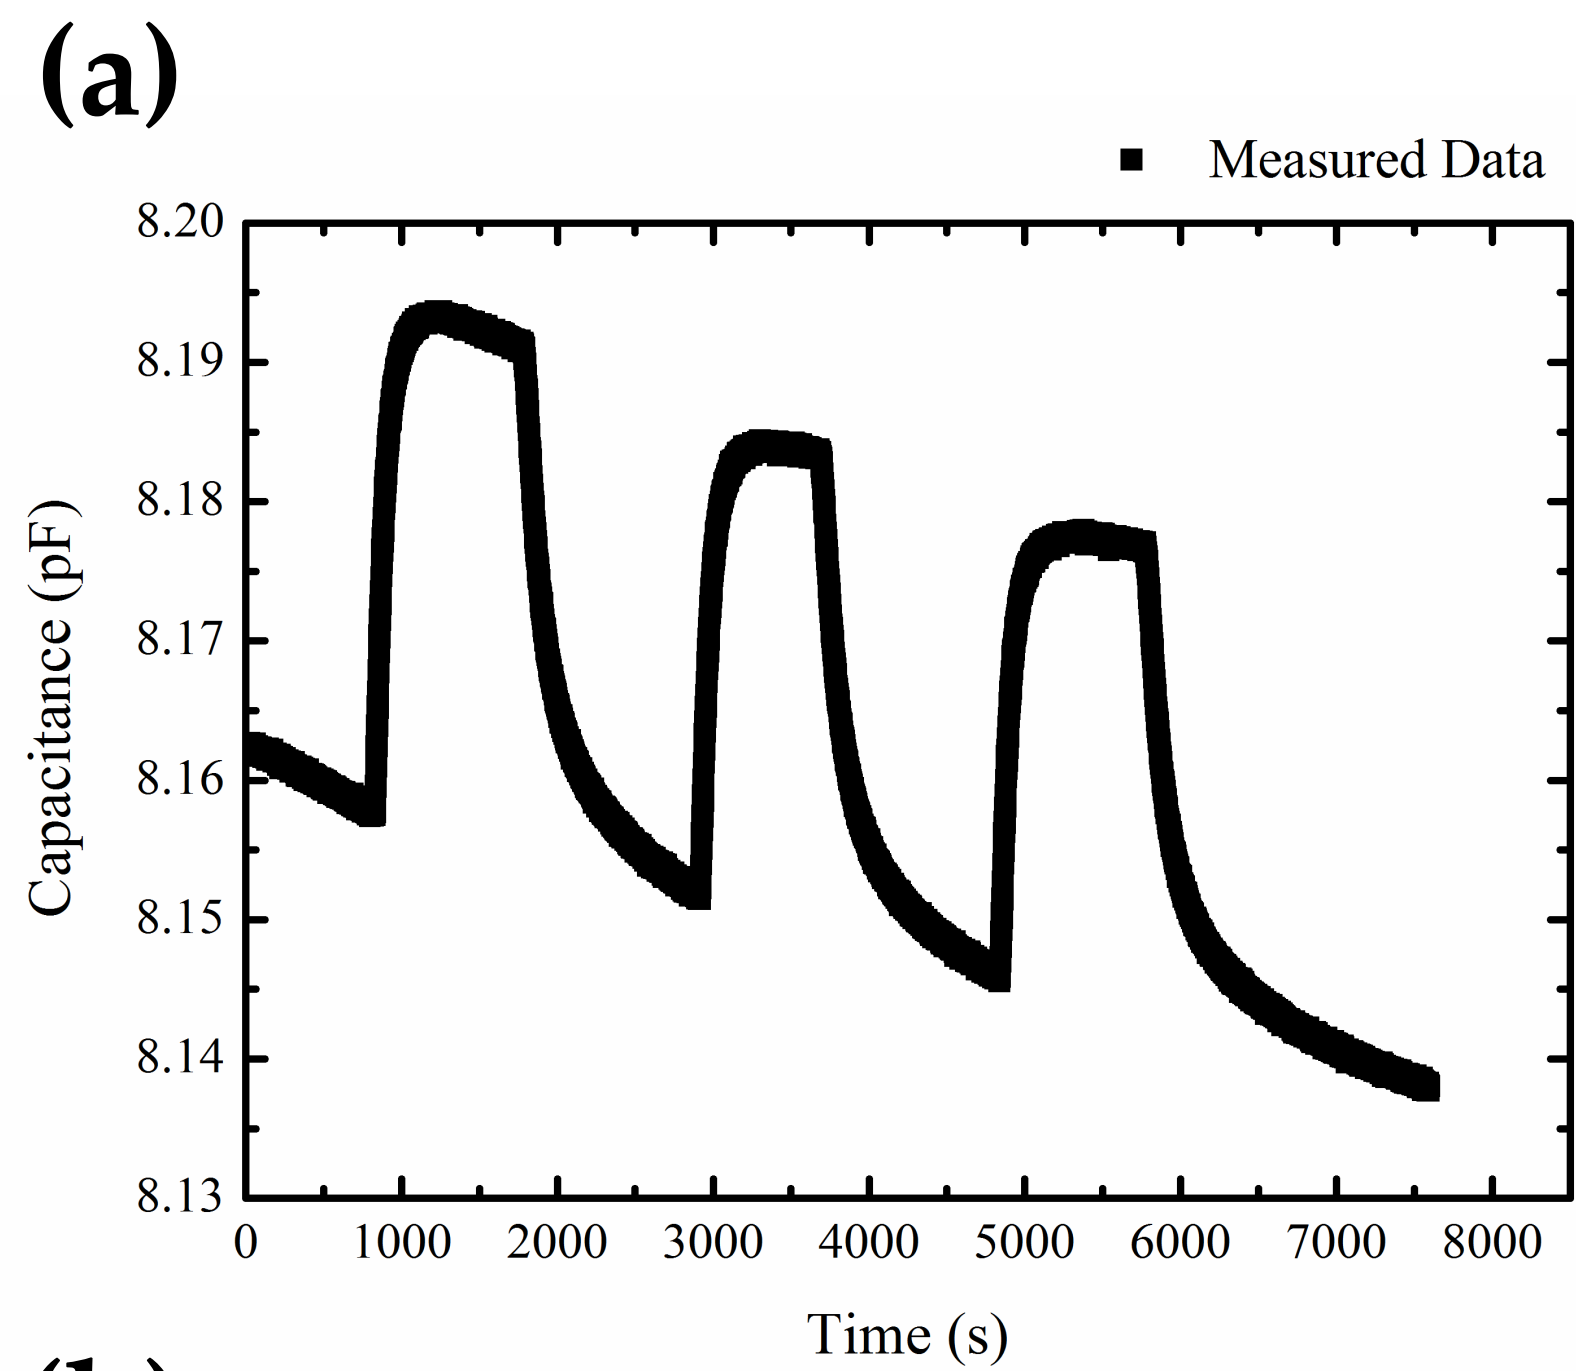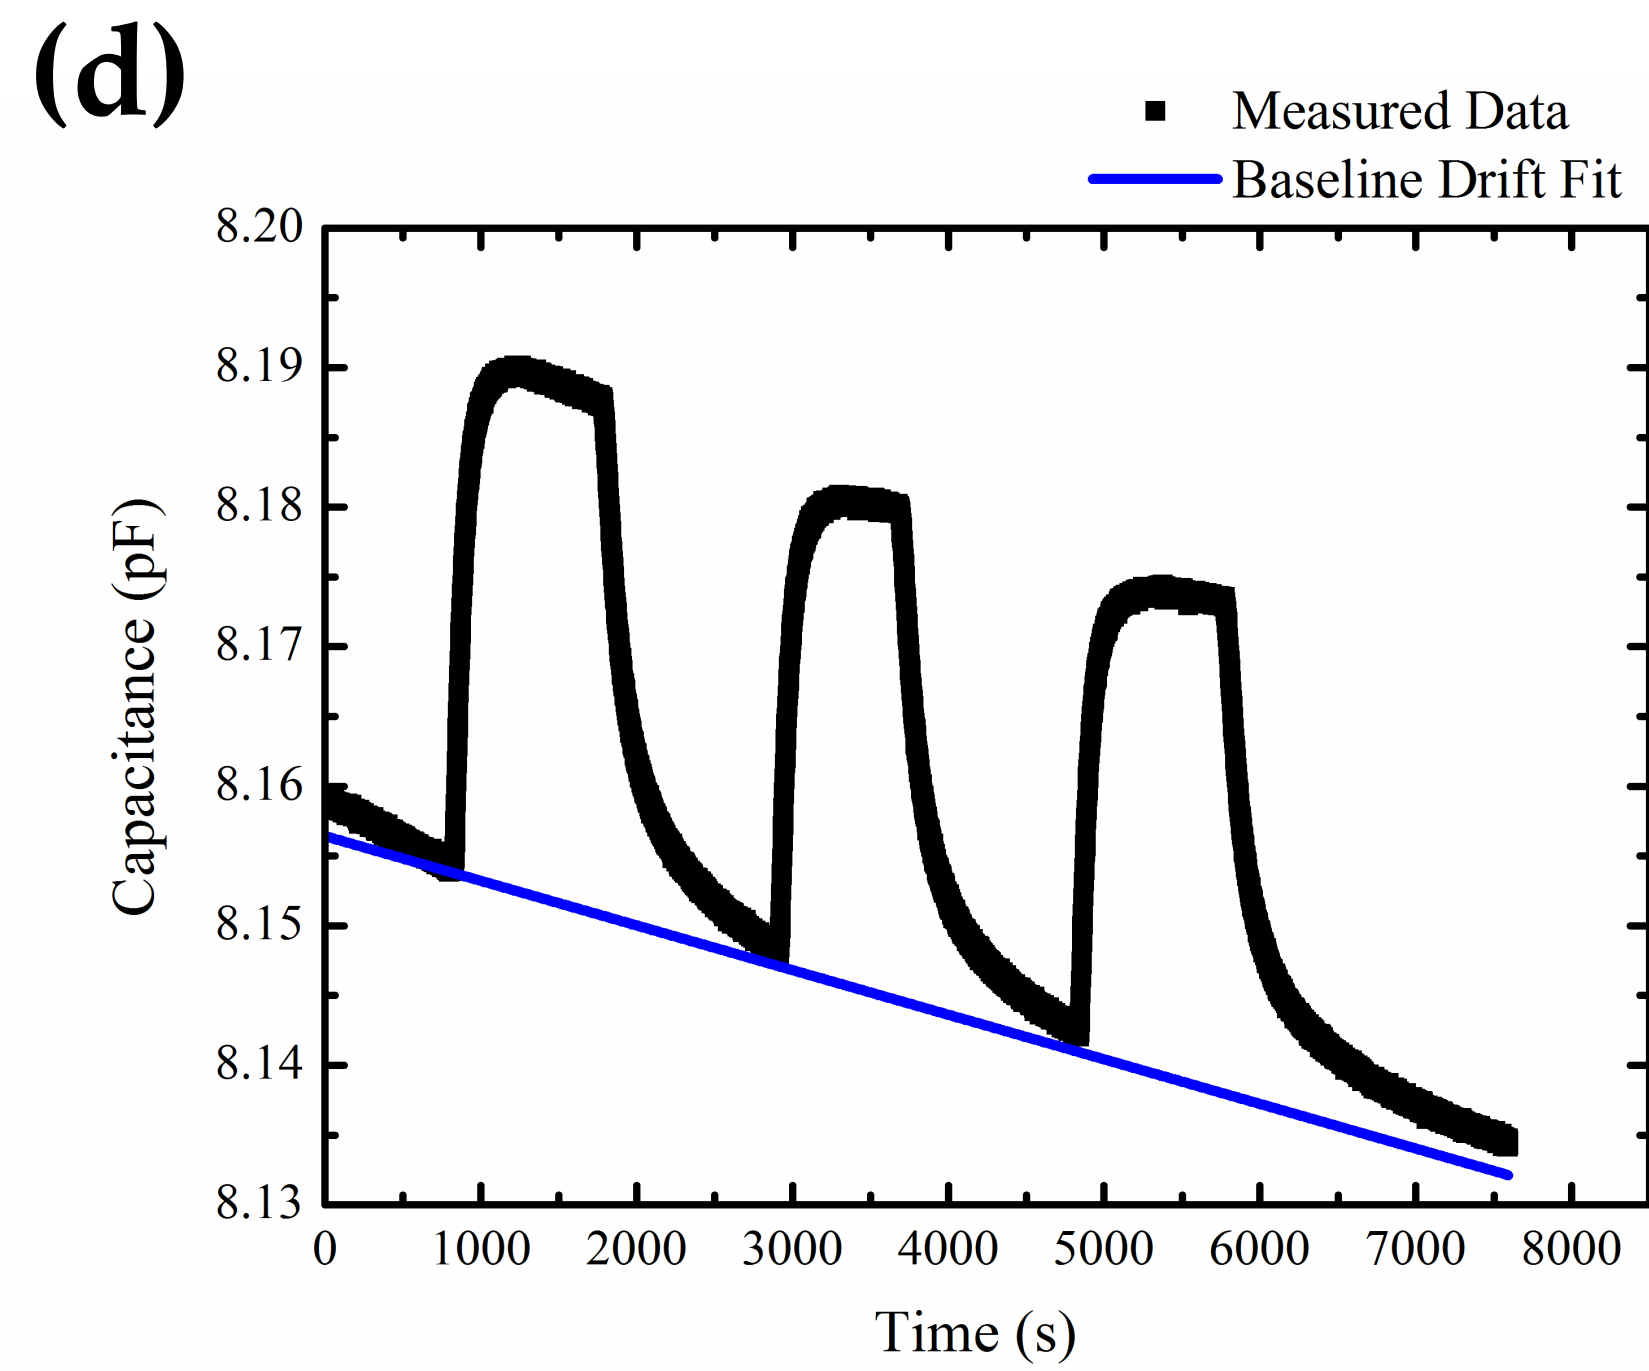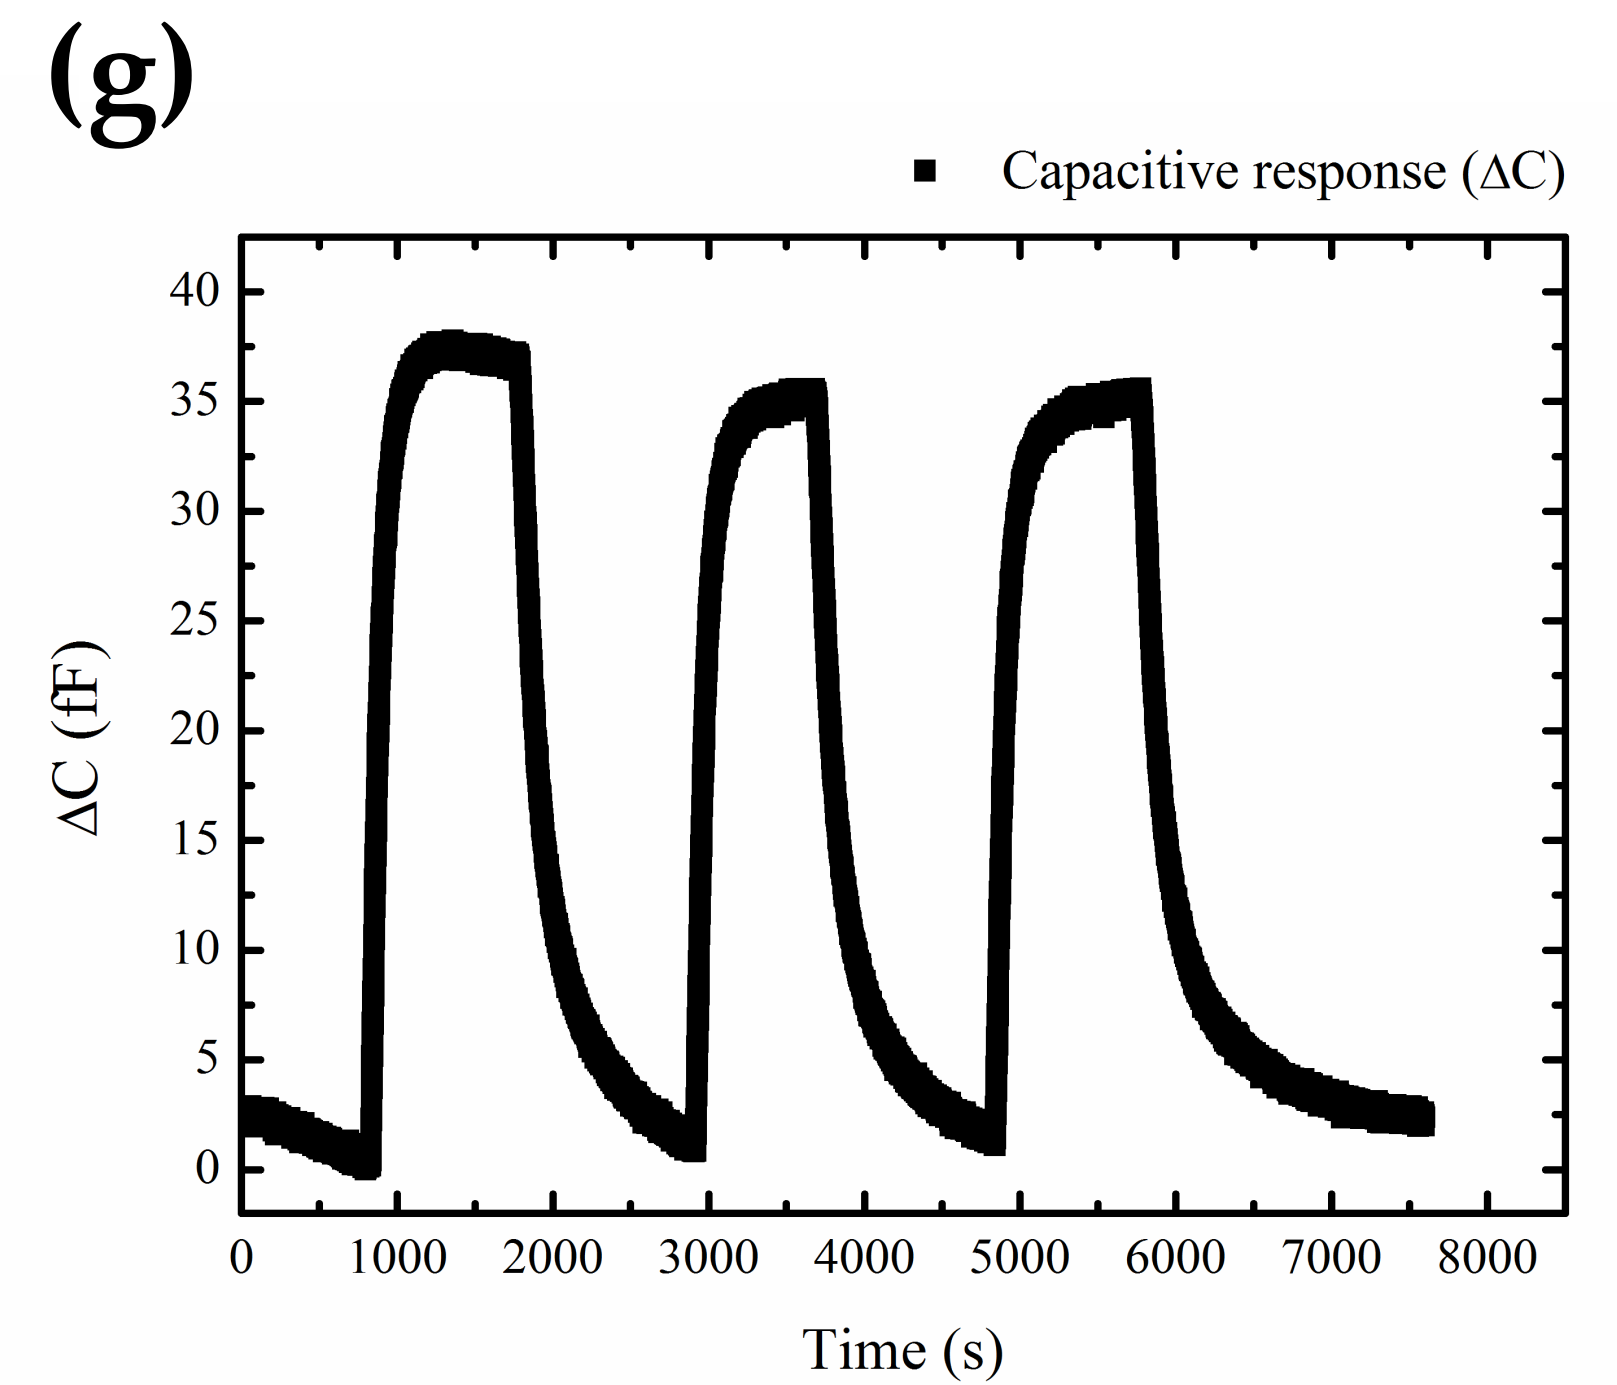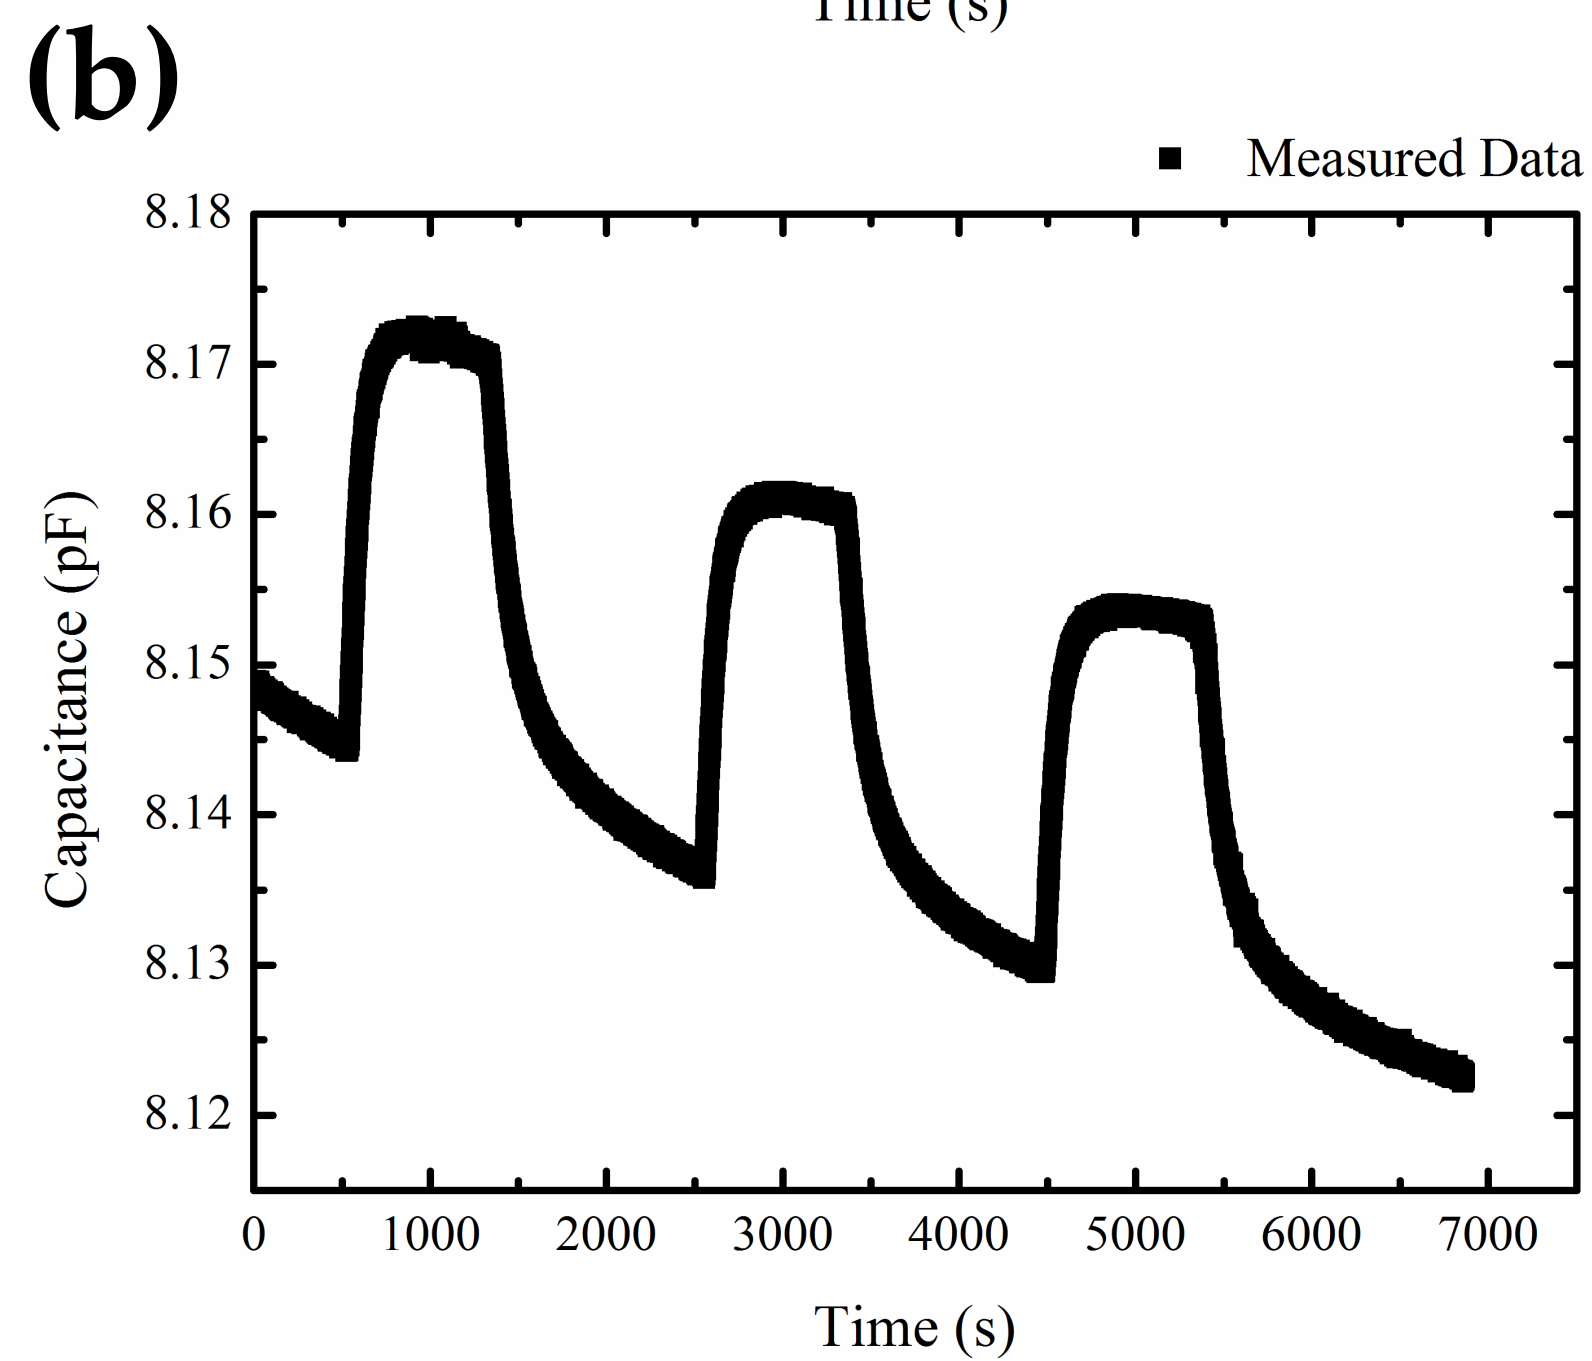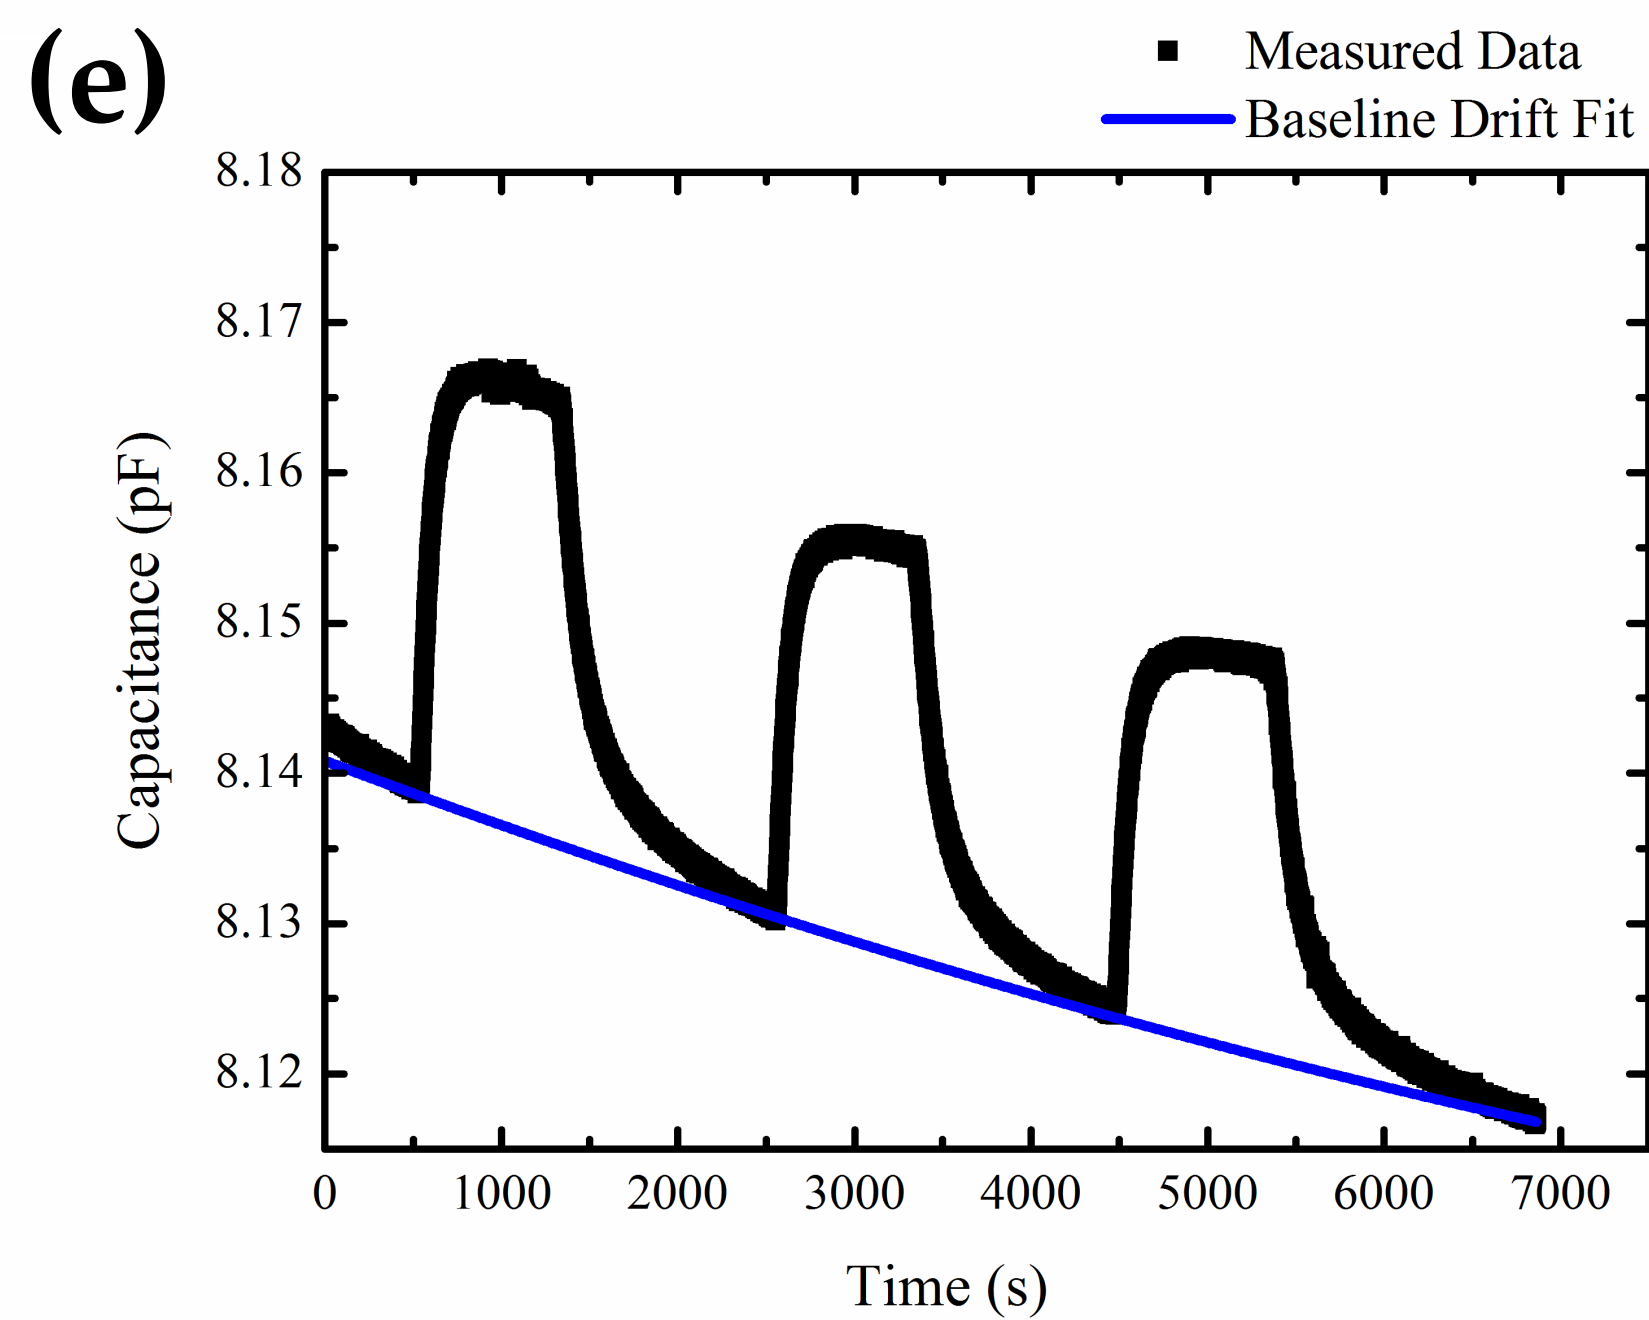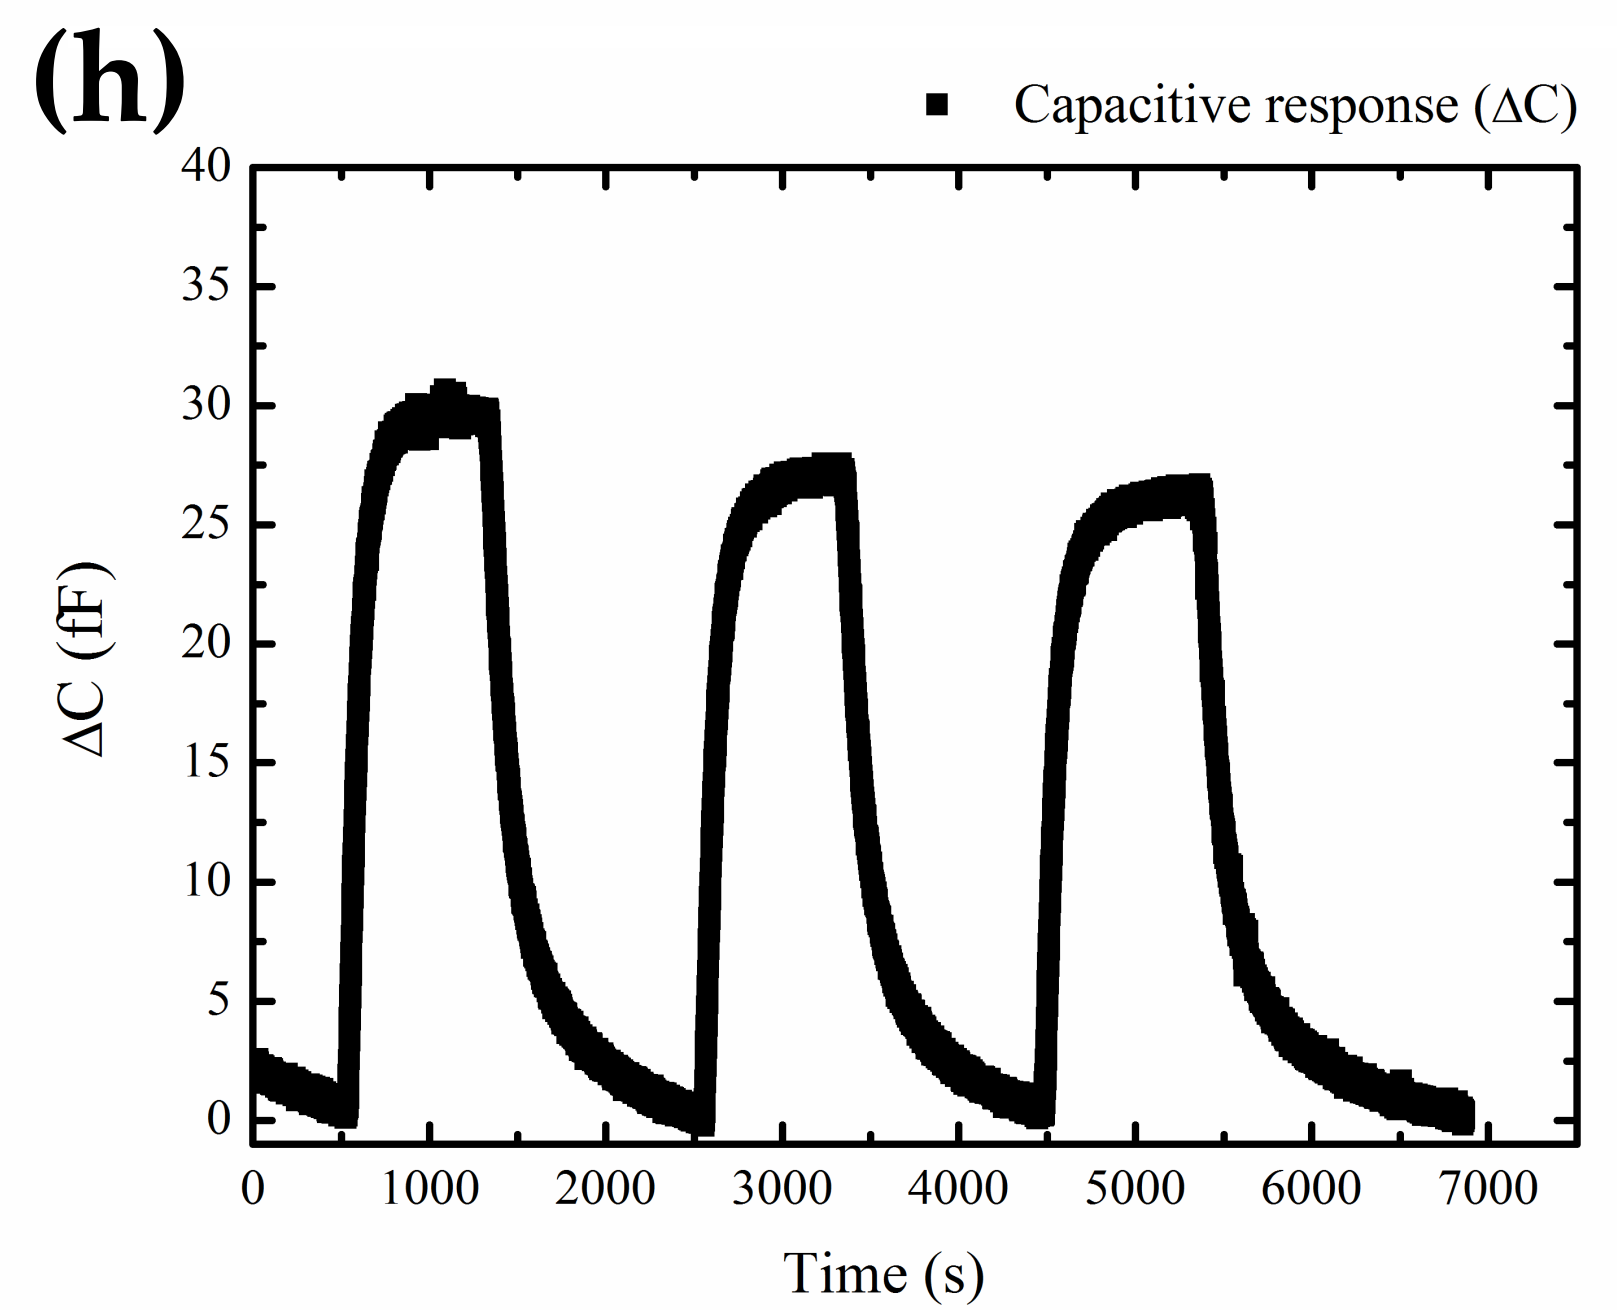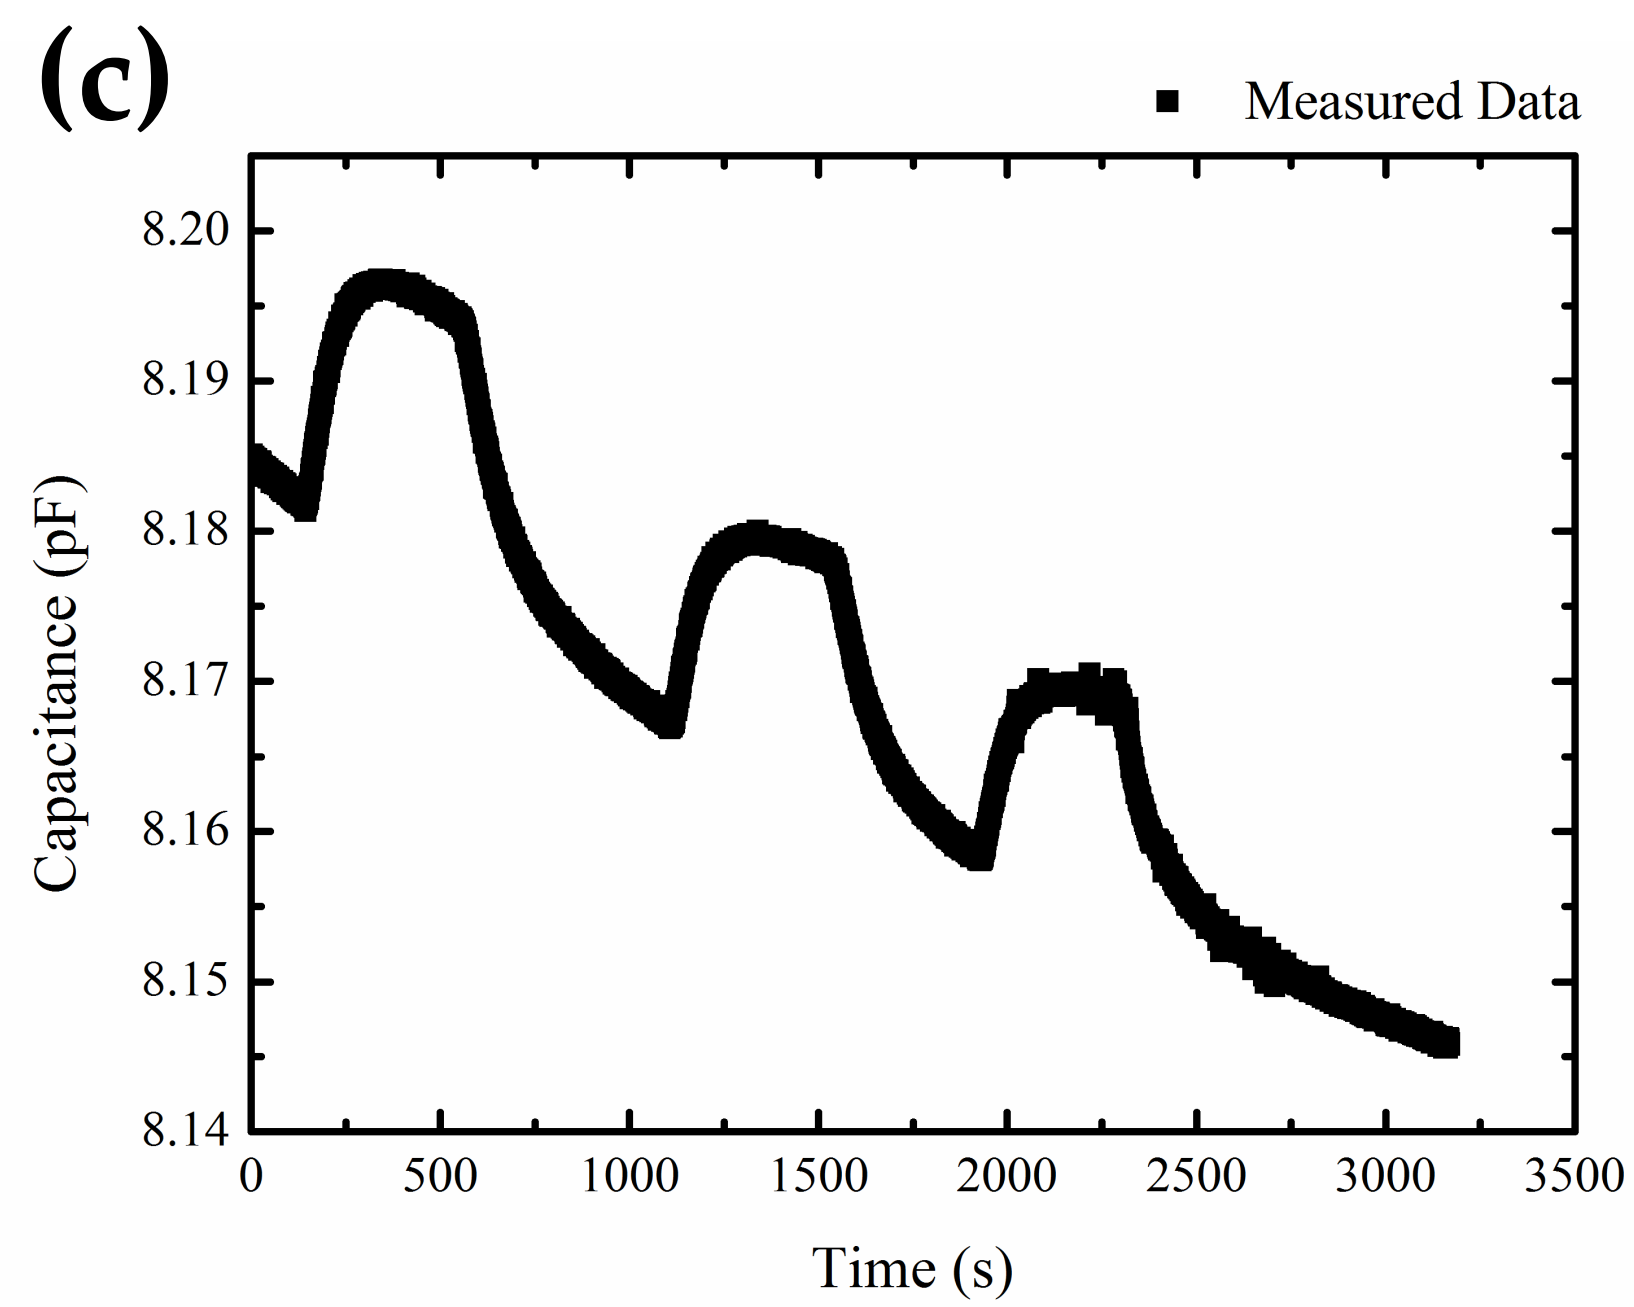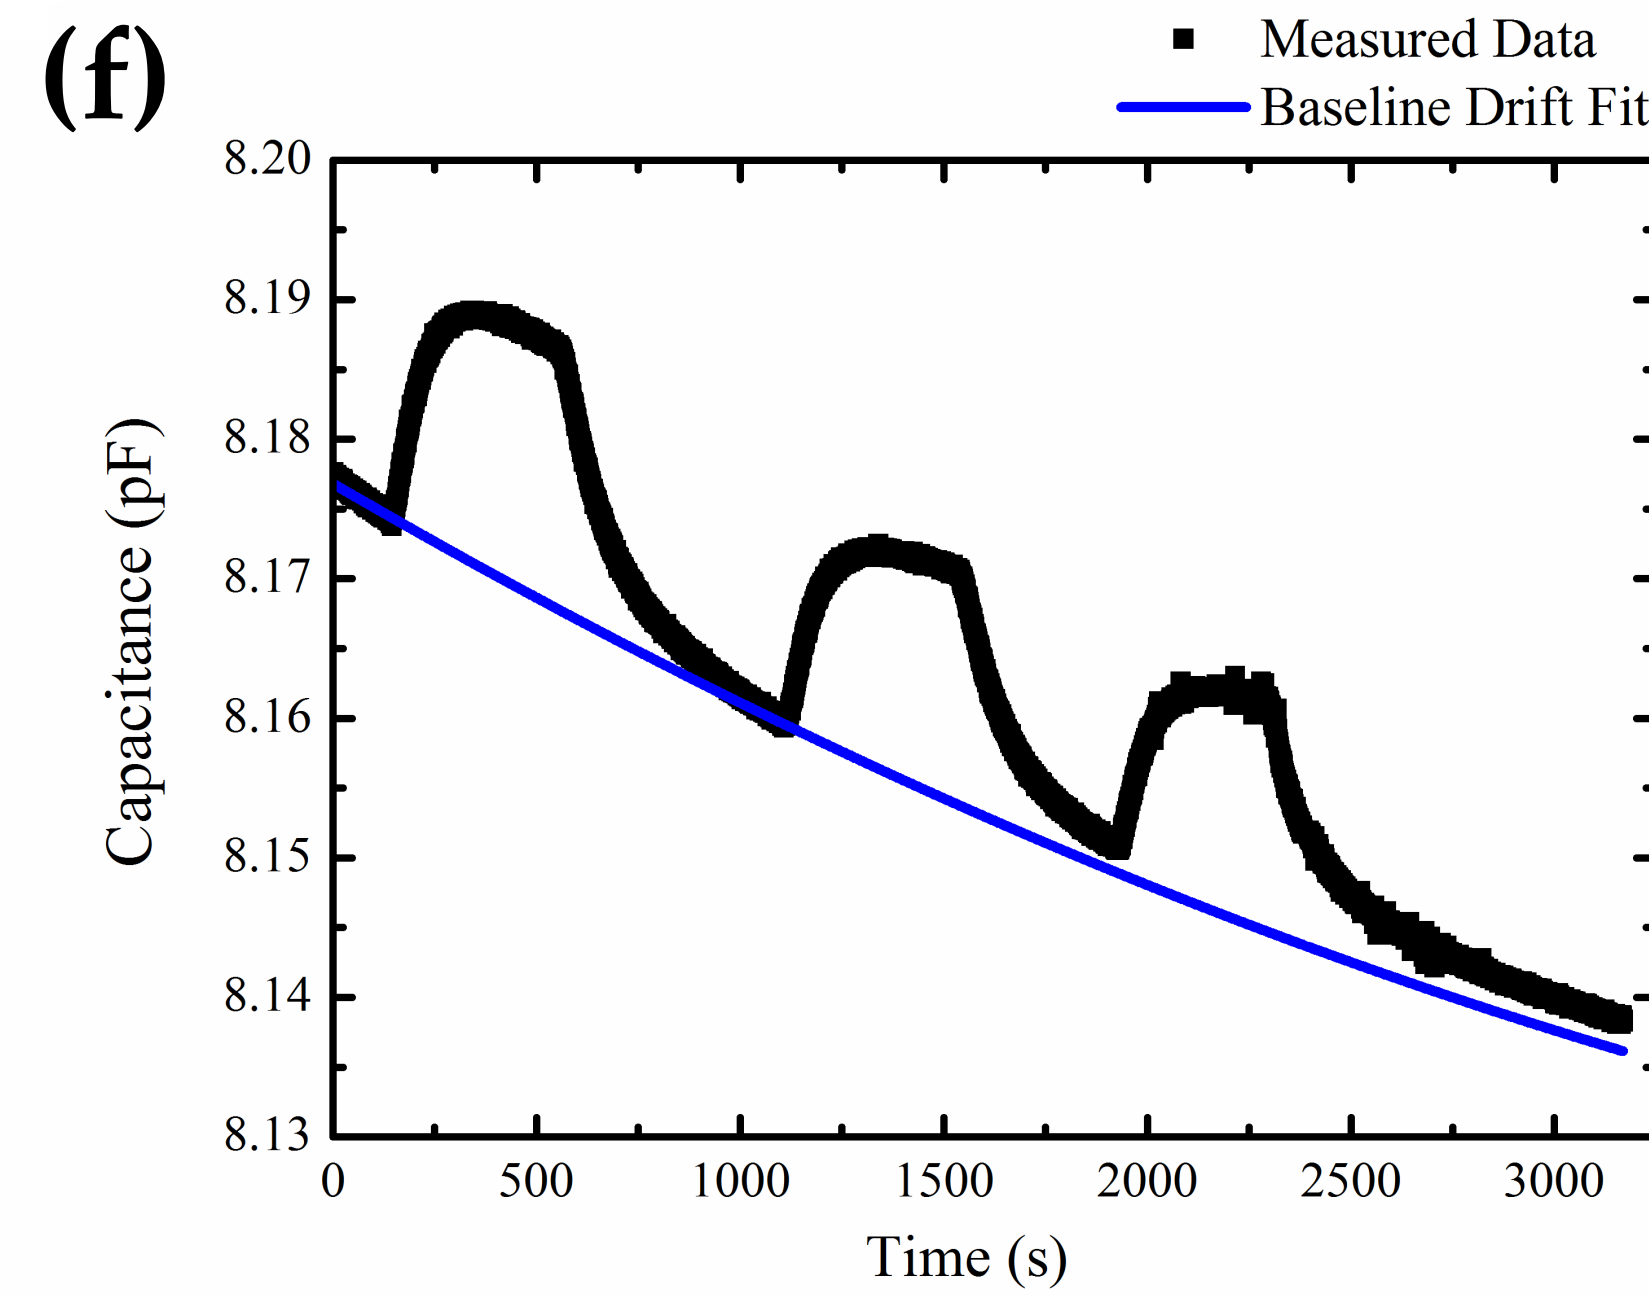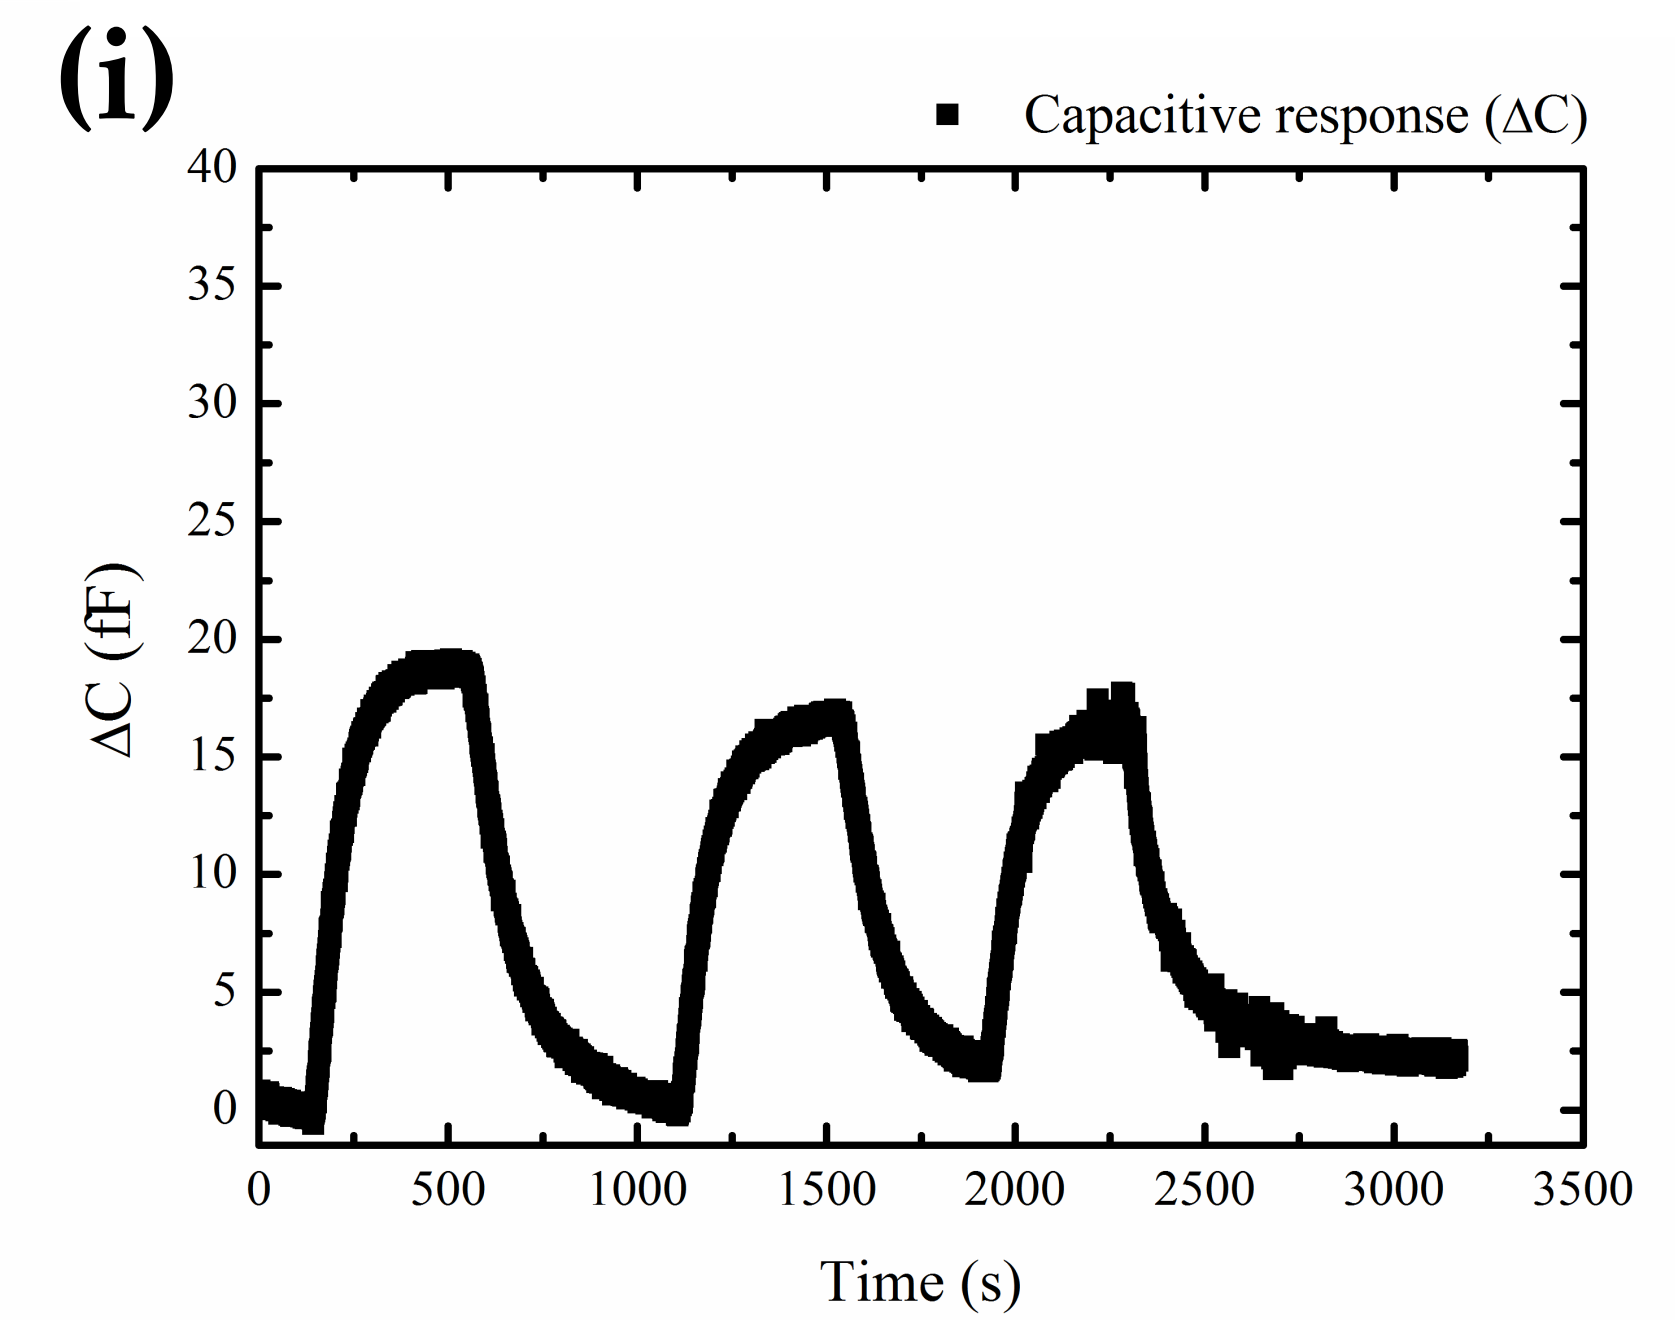

Supplement: s1 [file s1]

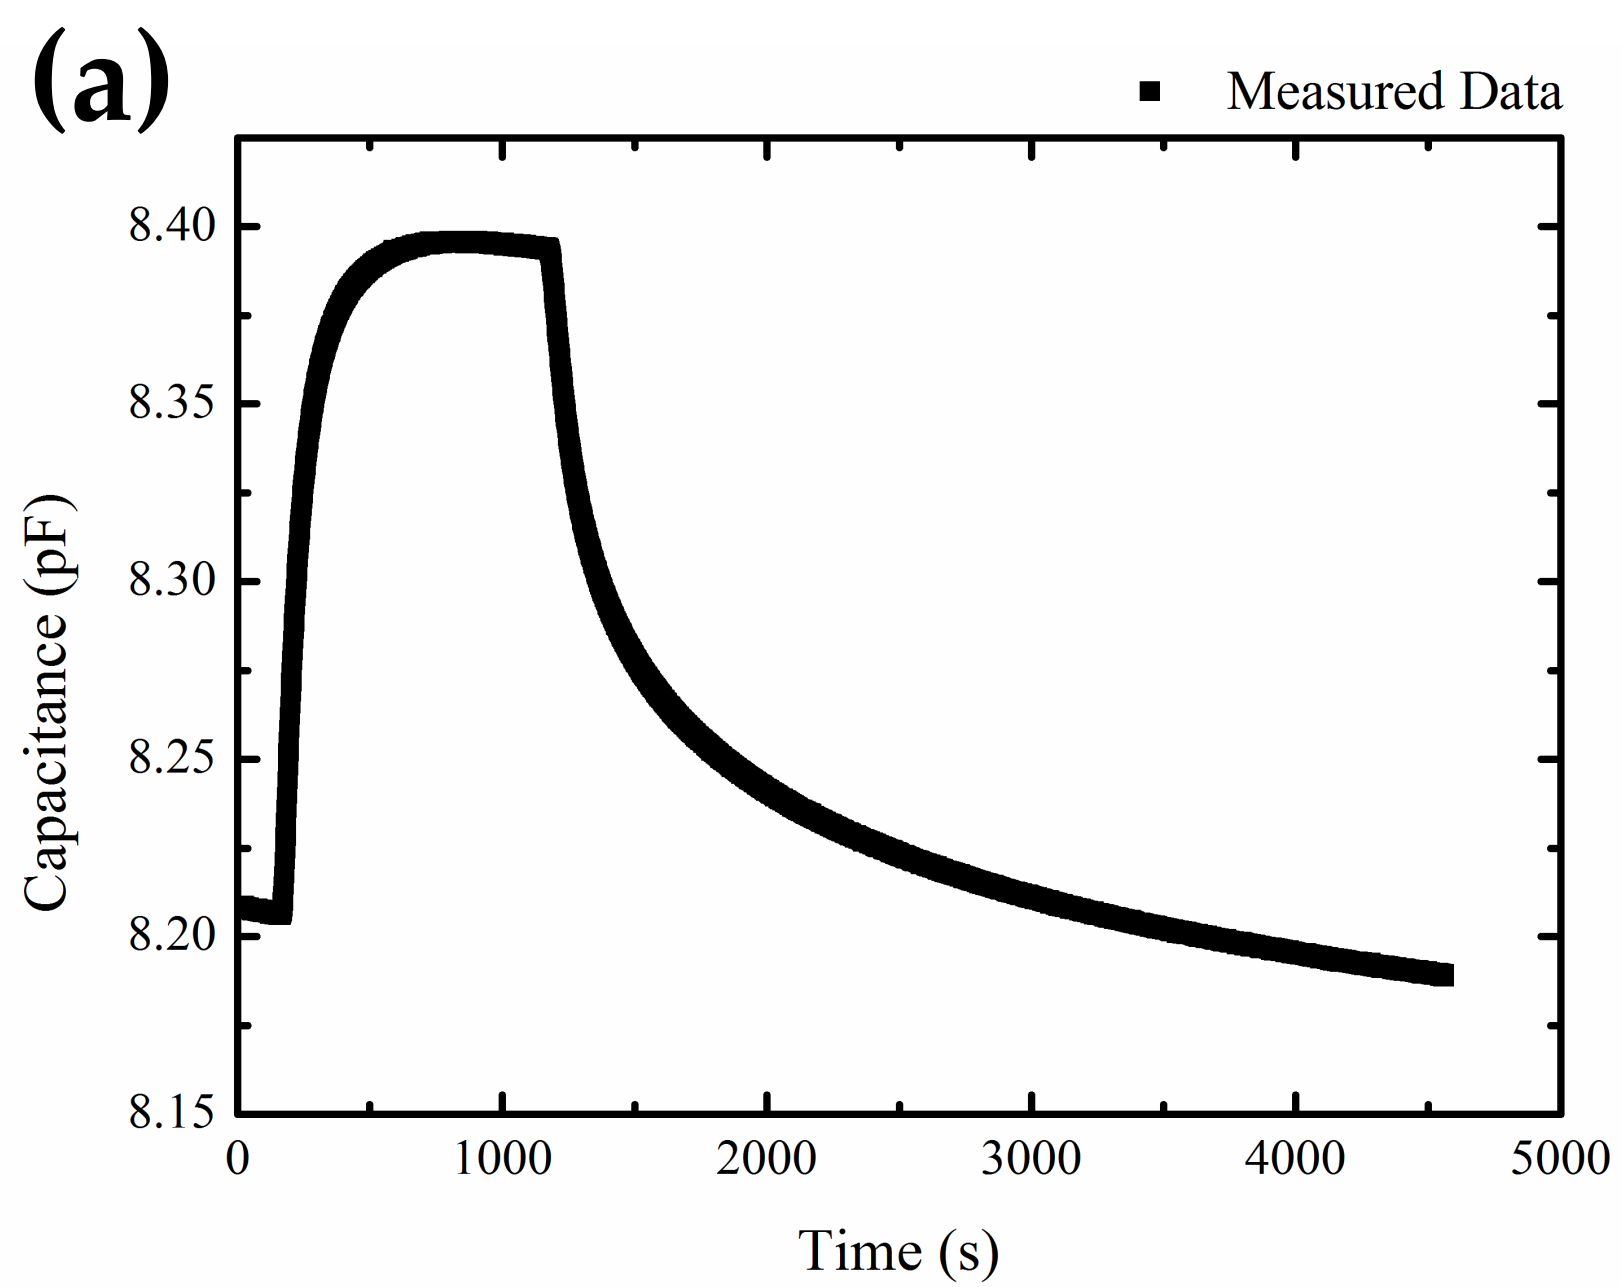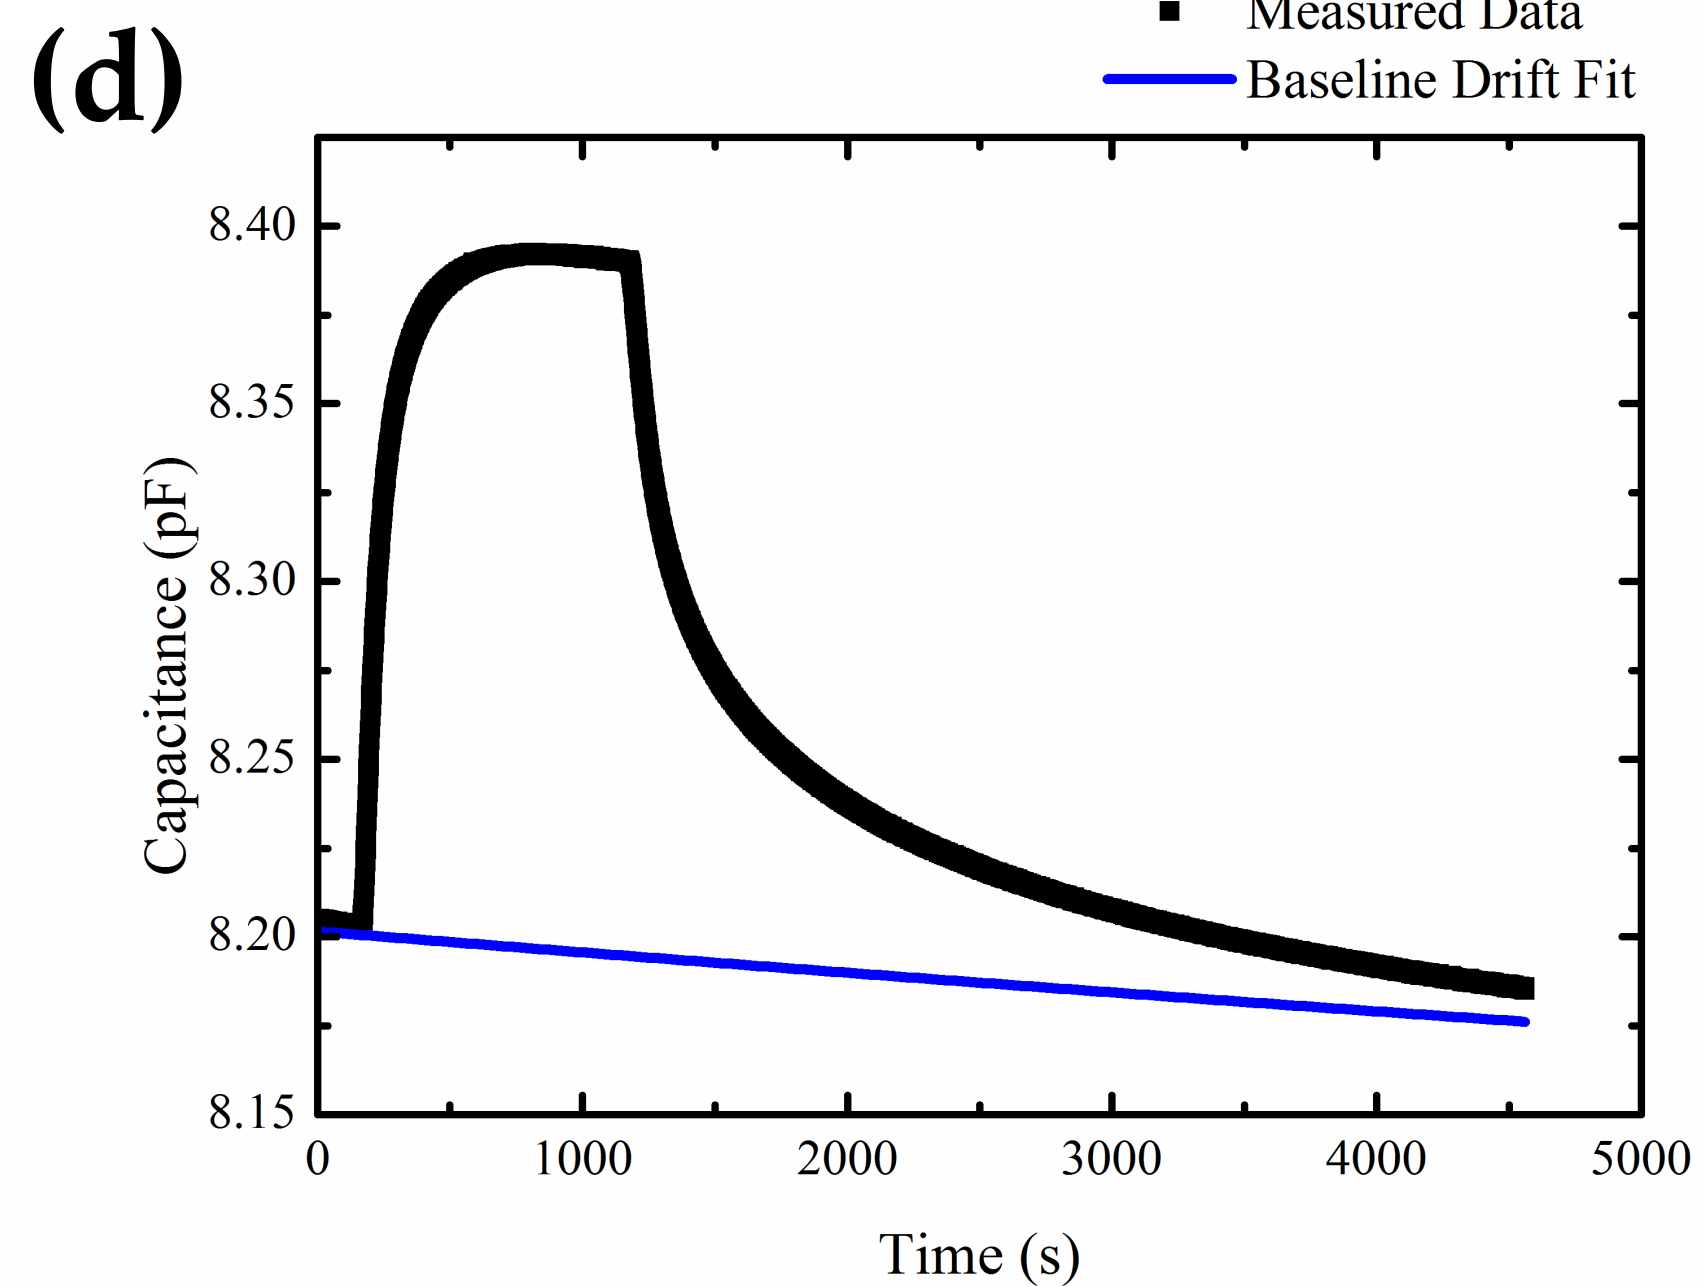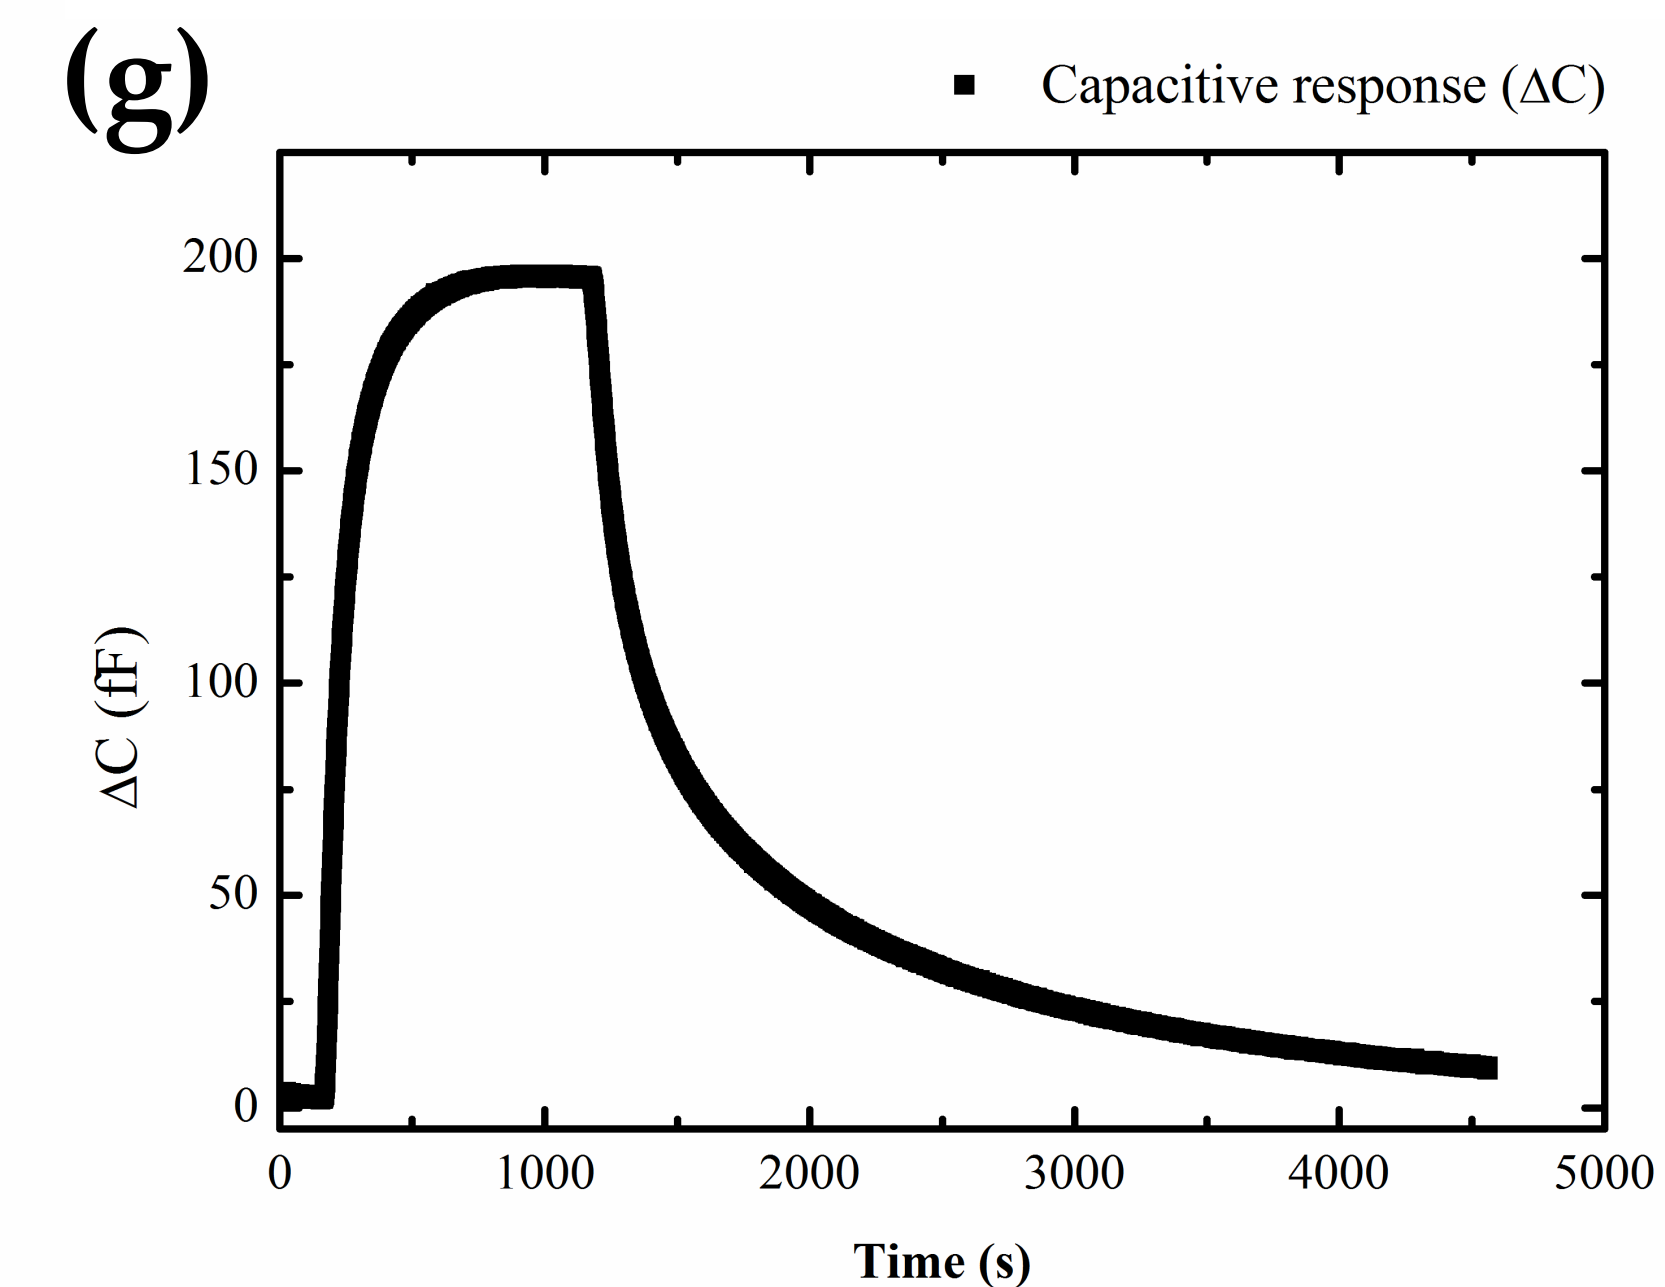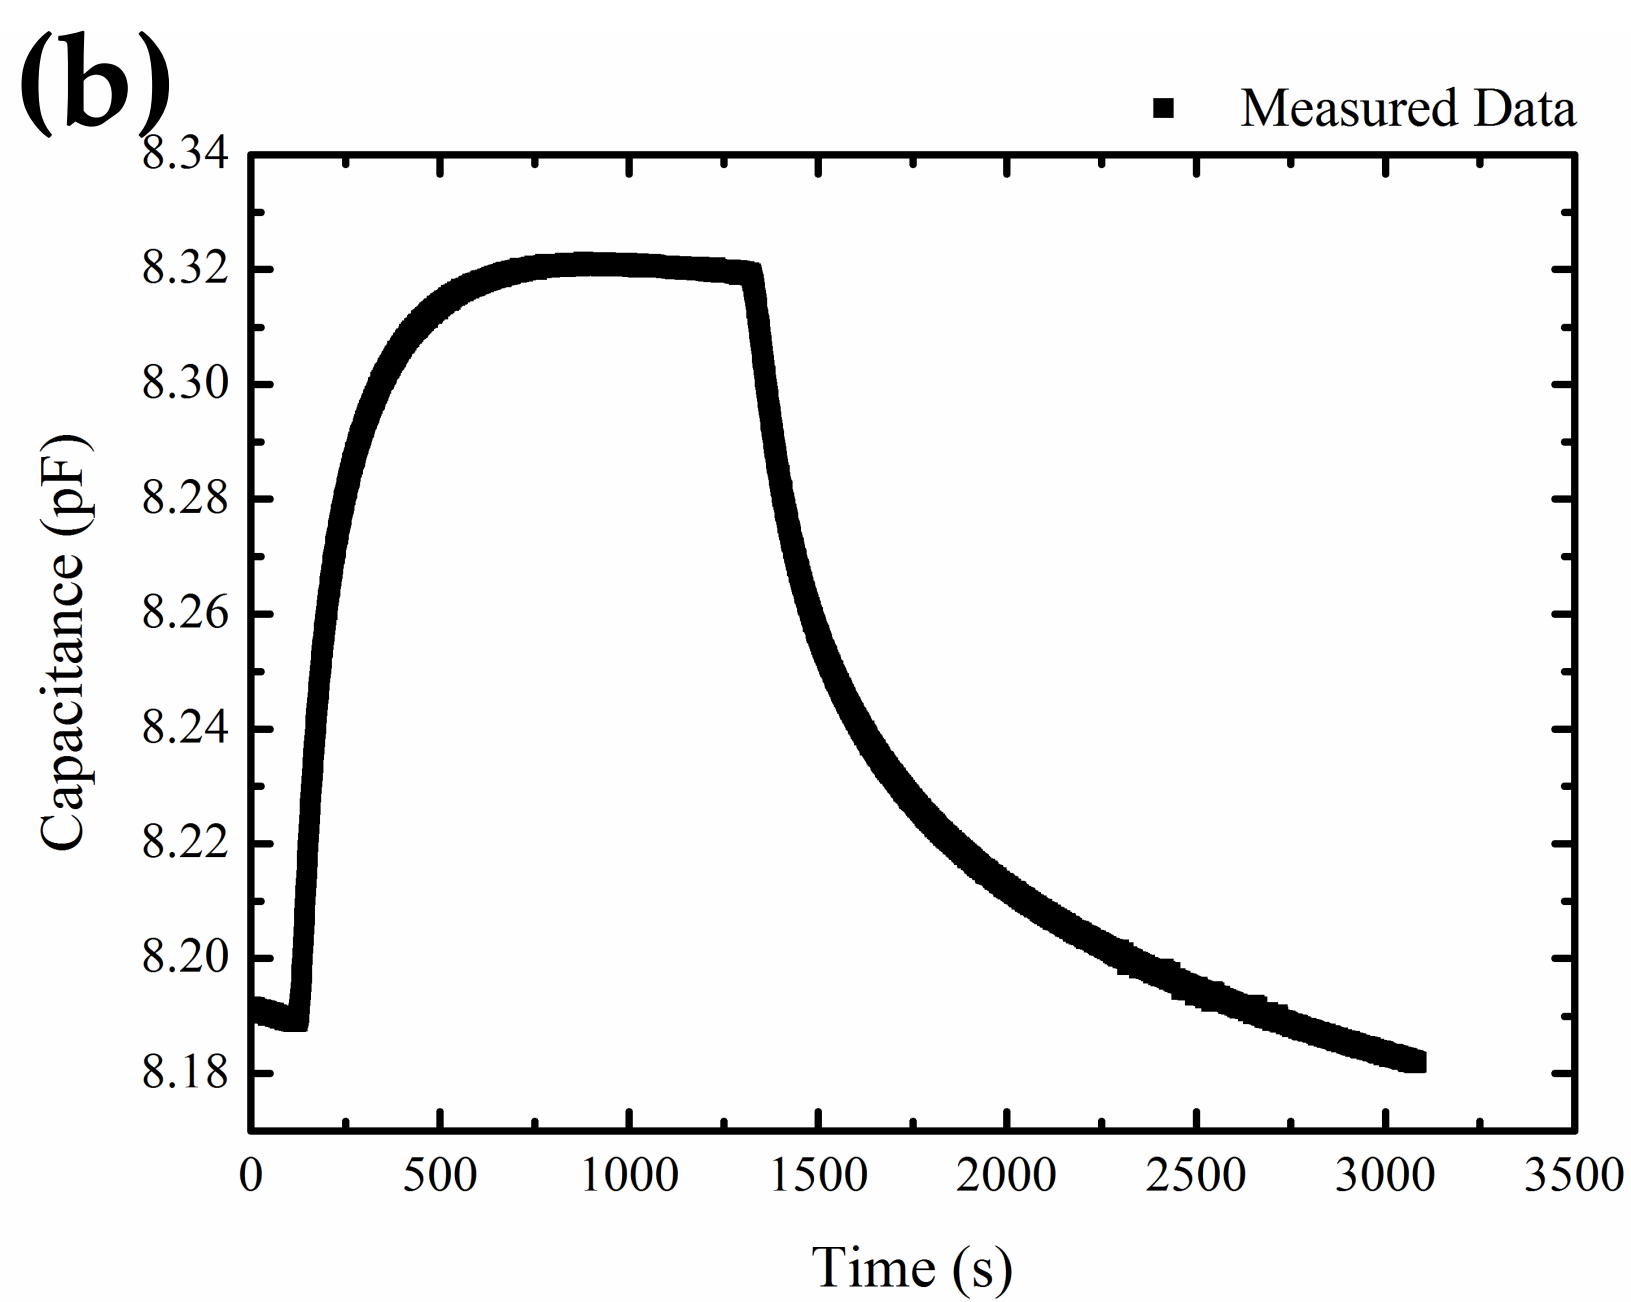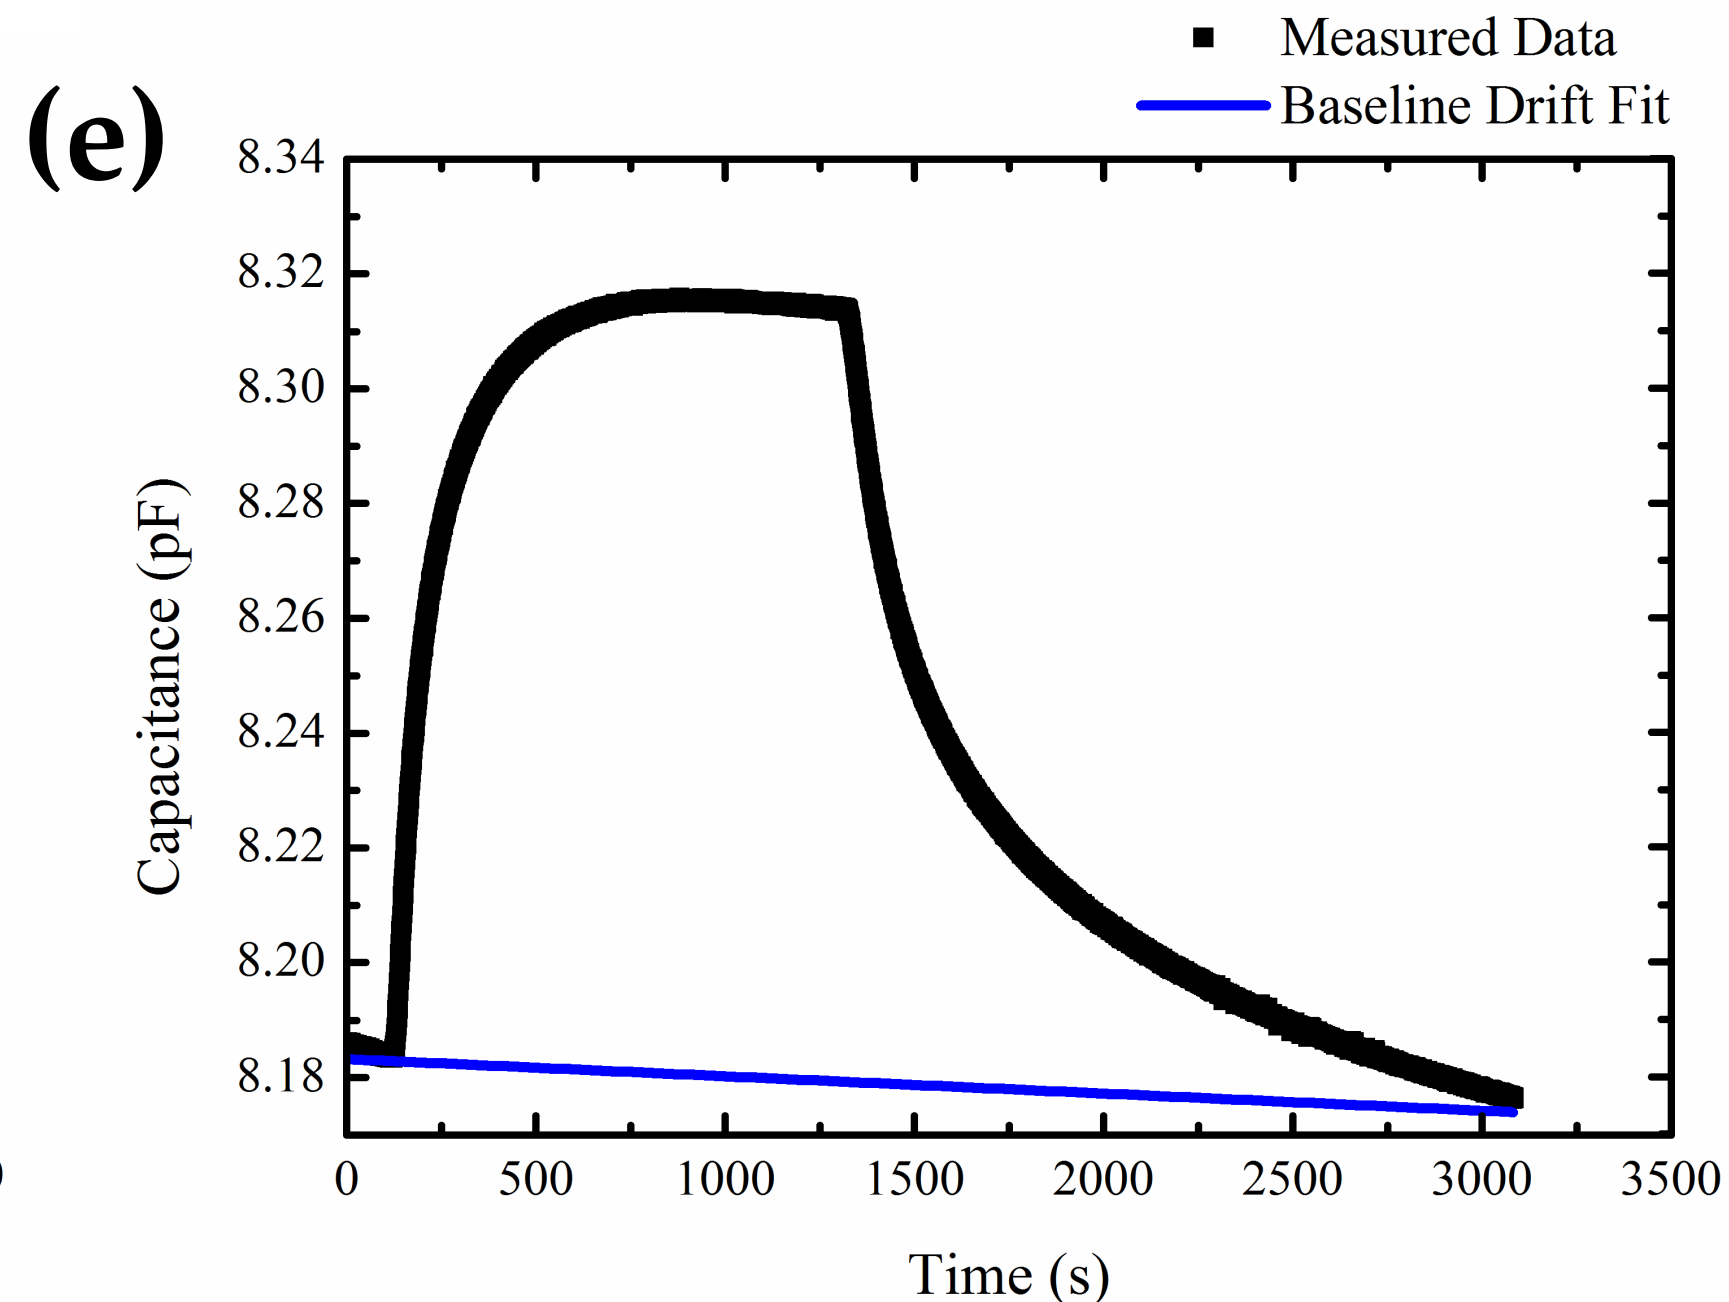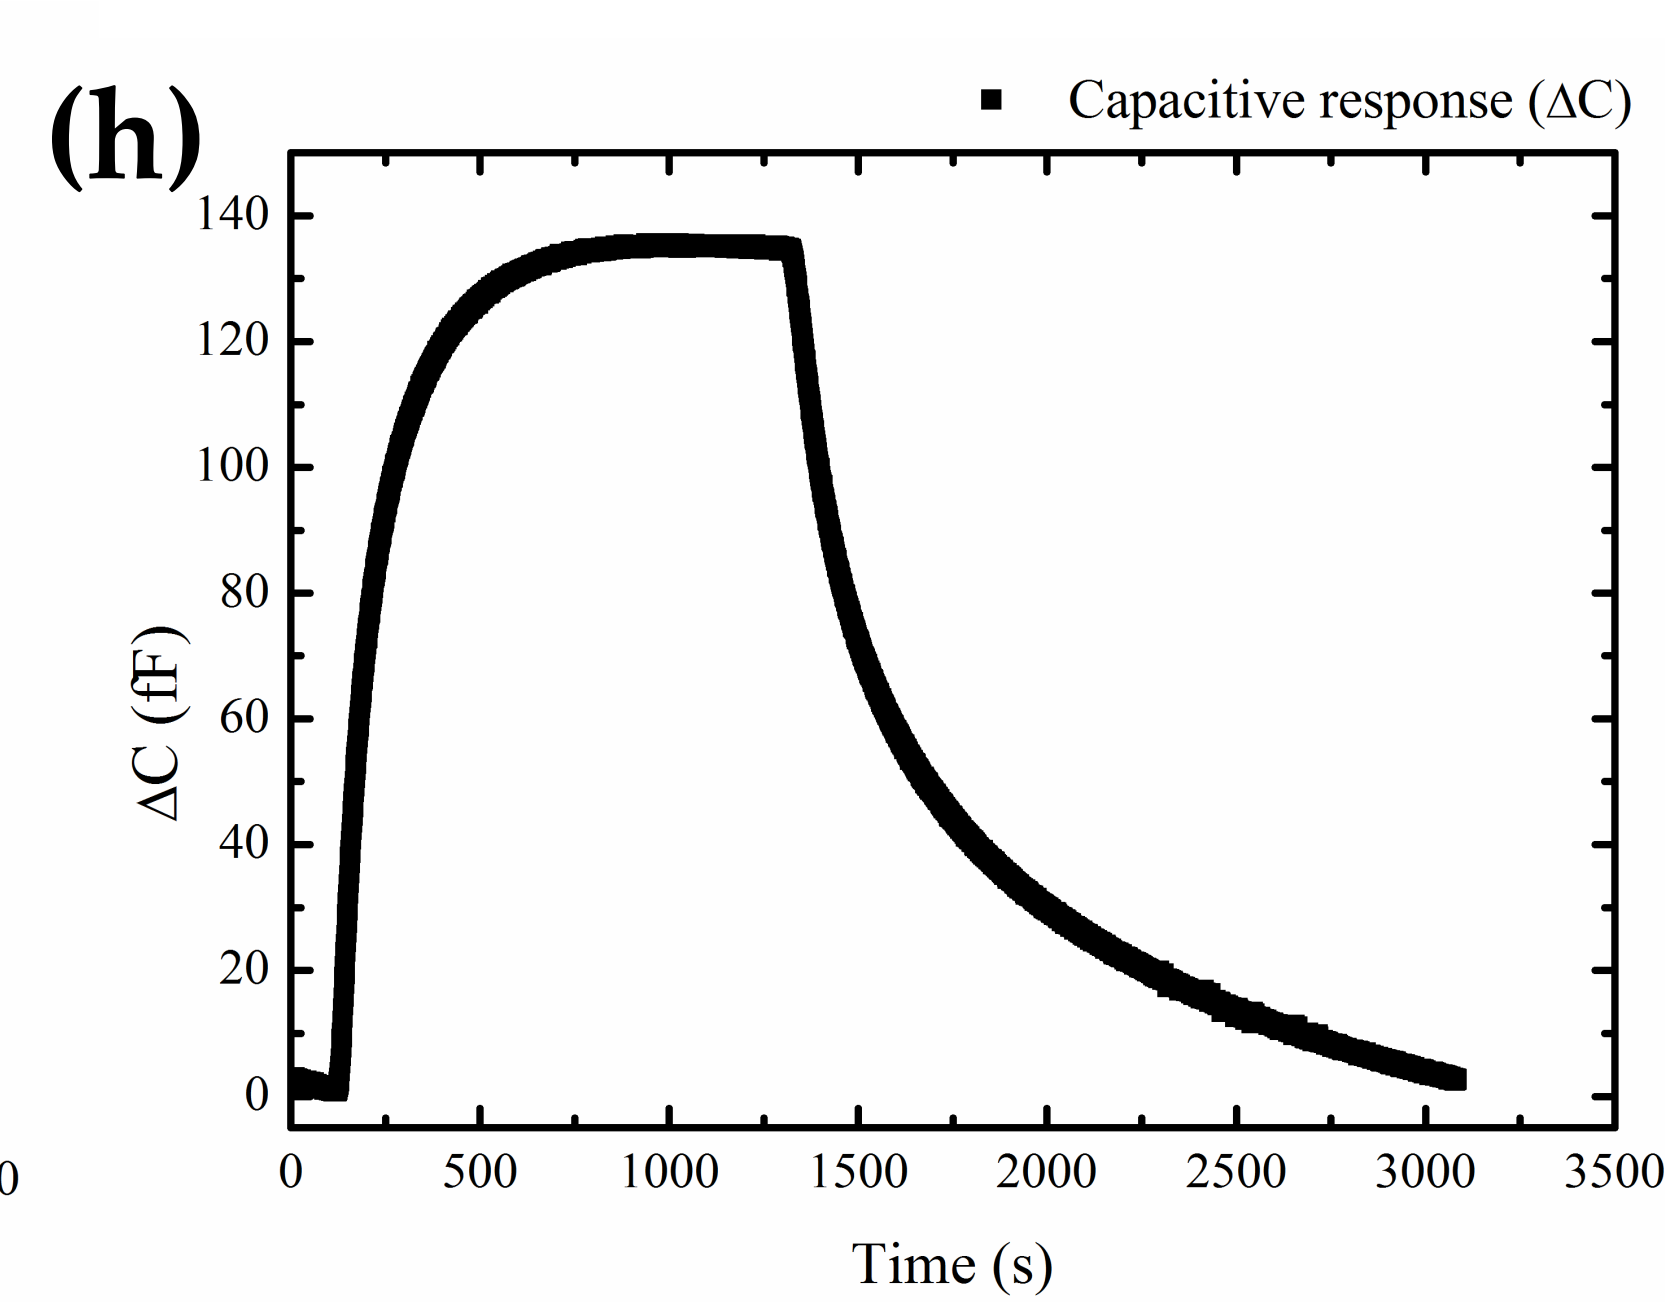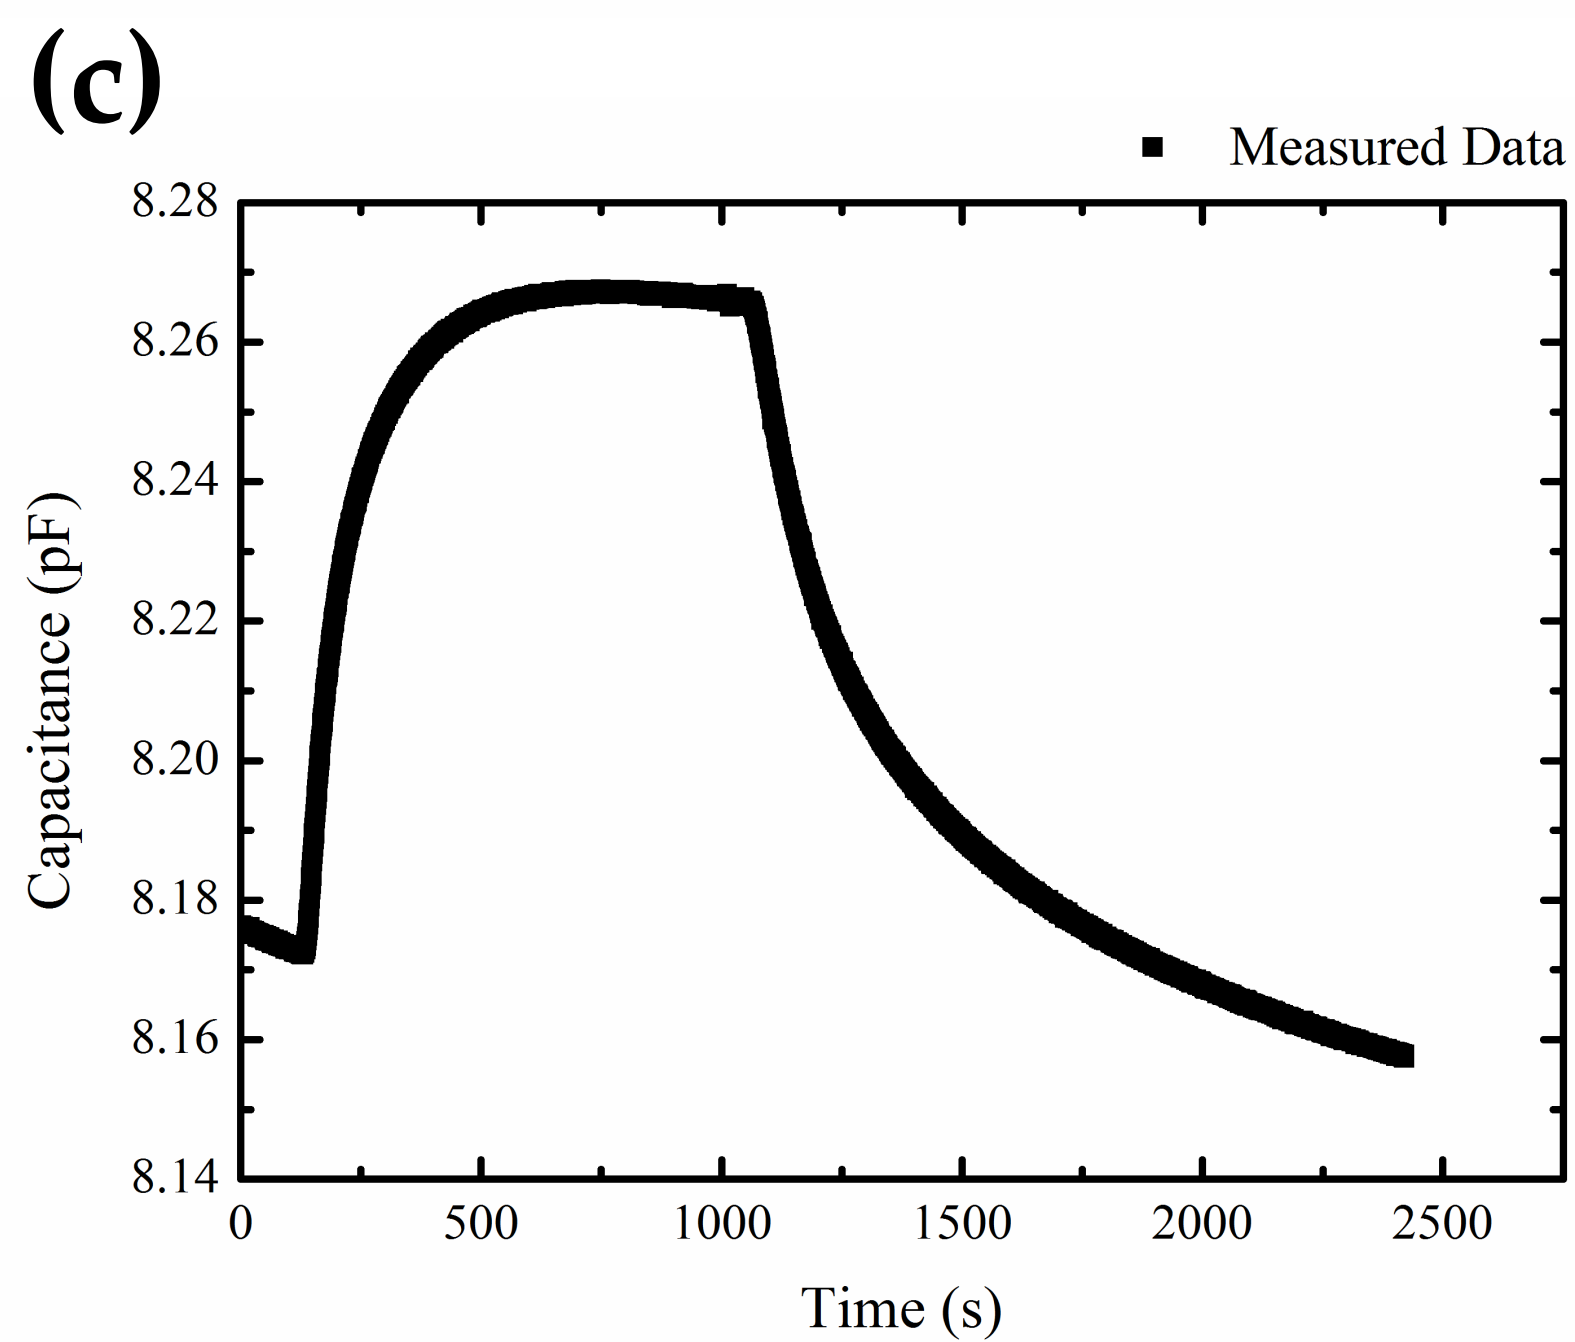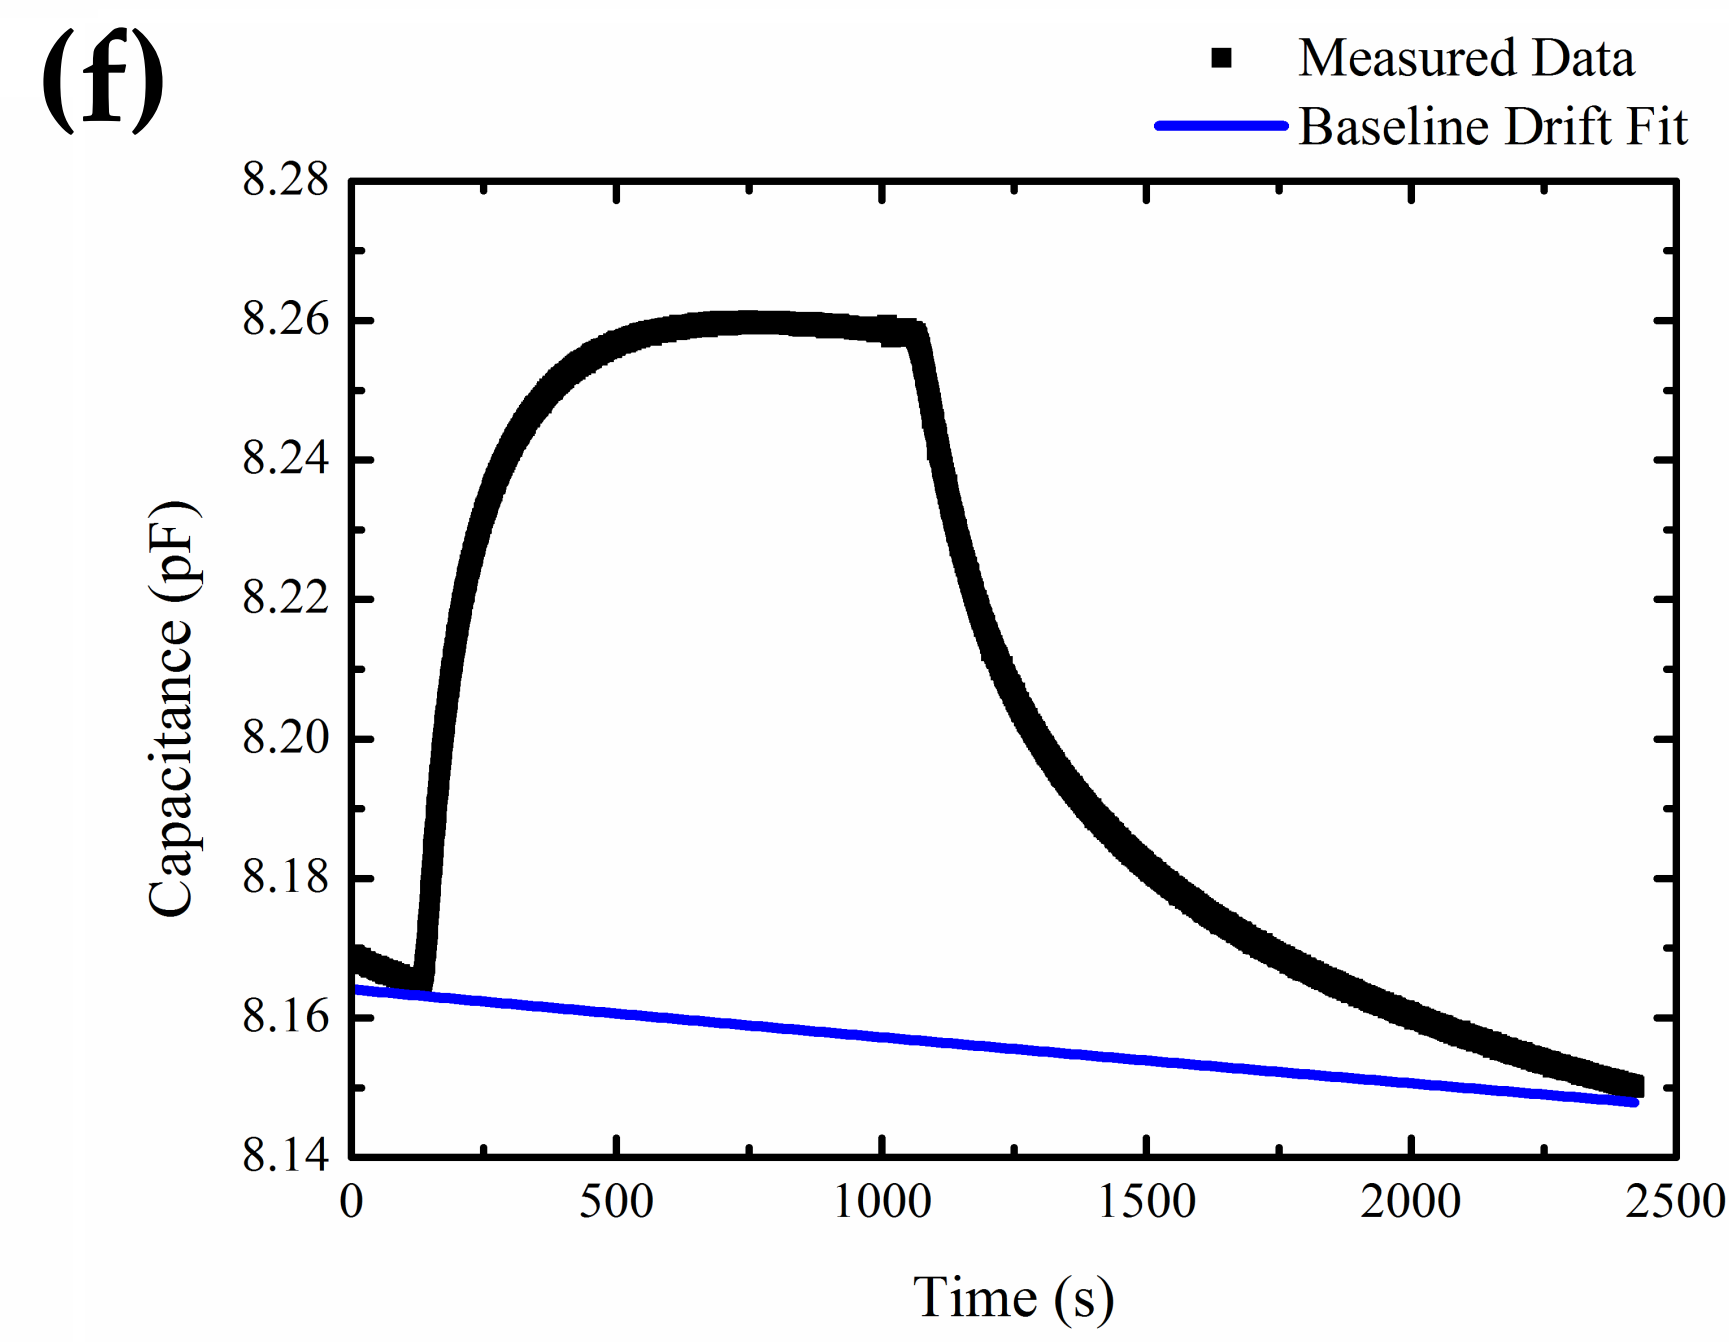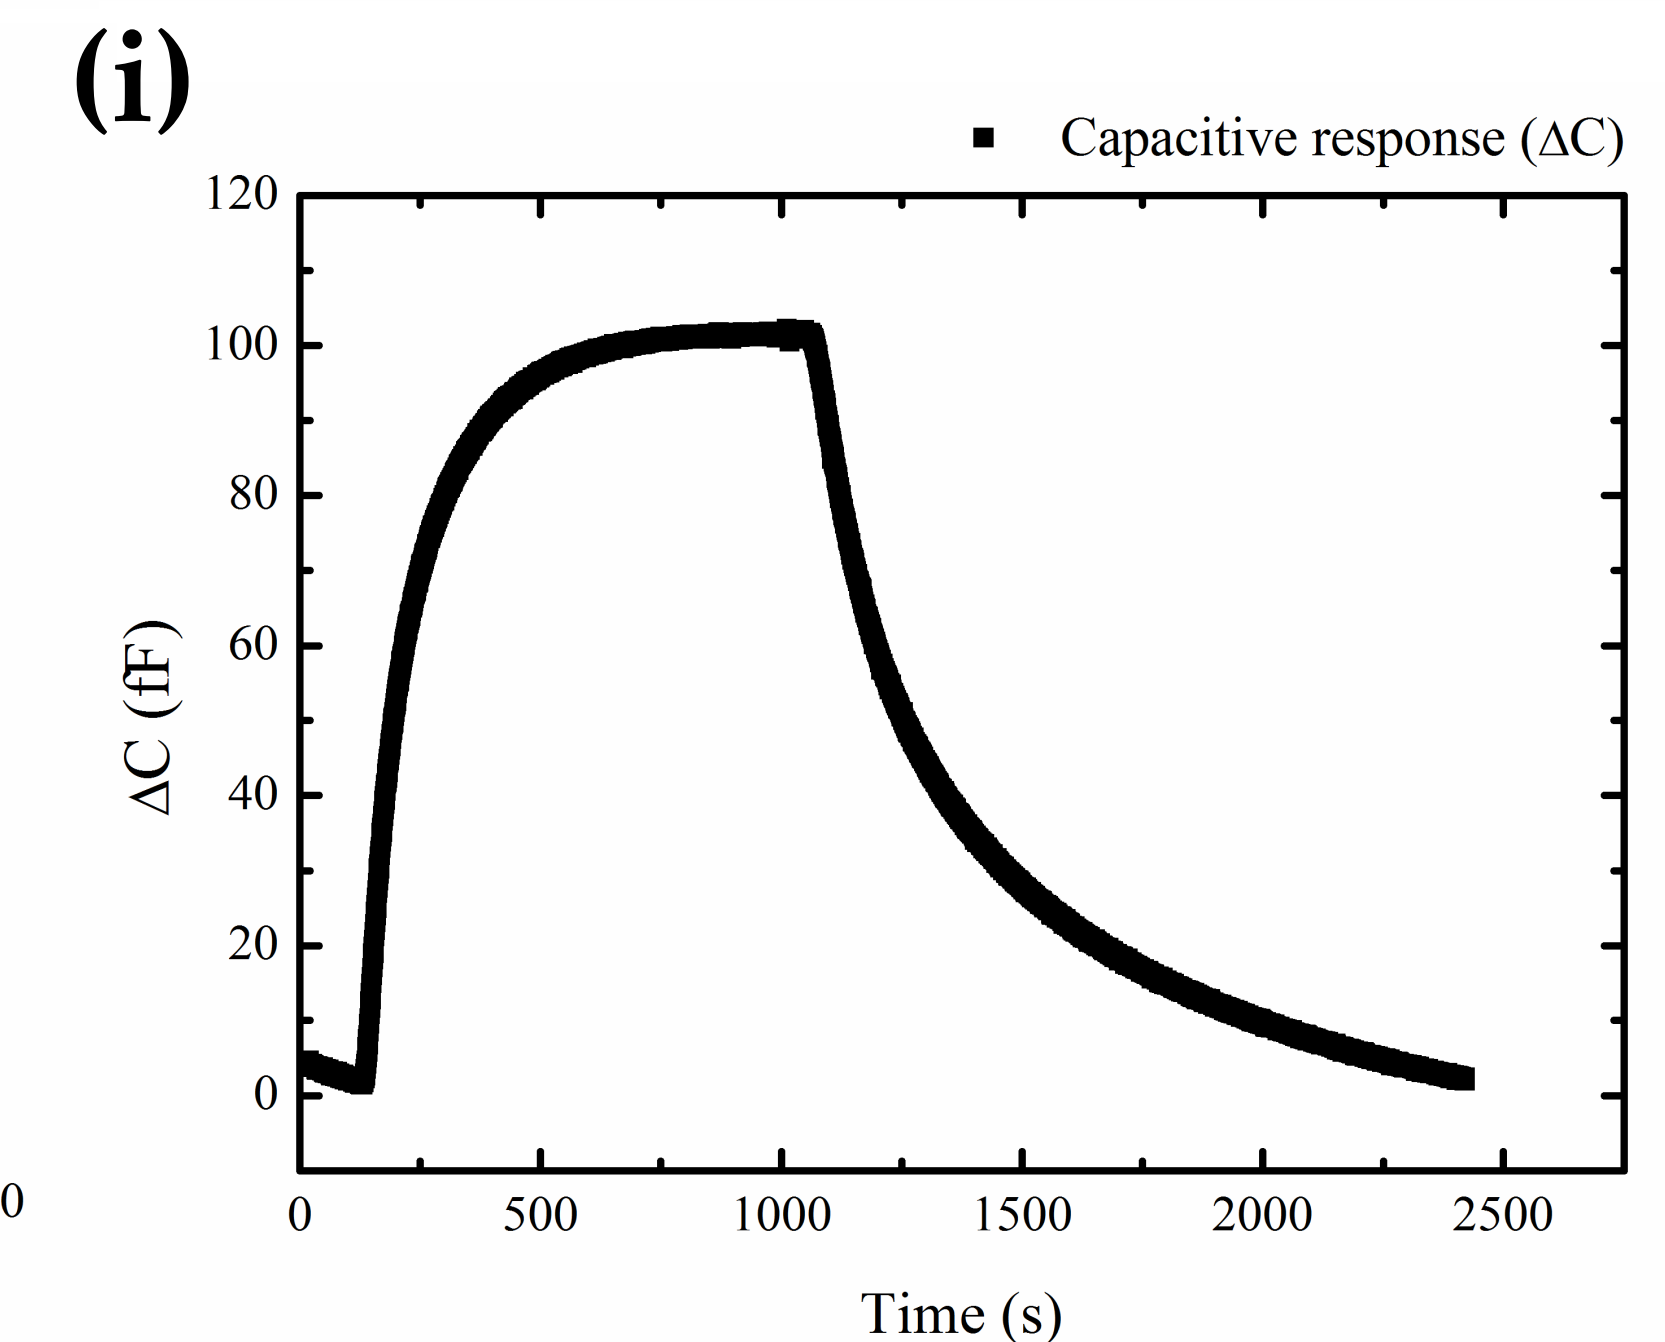

Supplement: s1 [file s1]

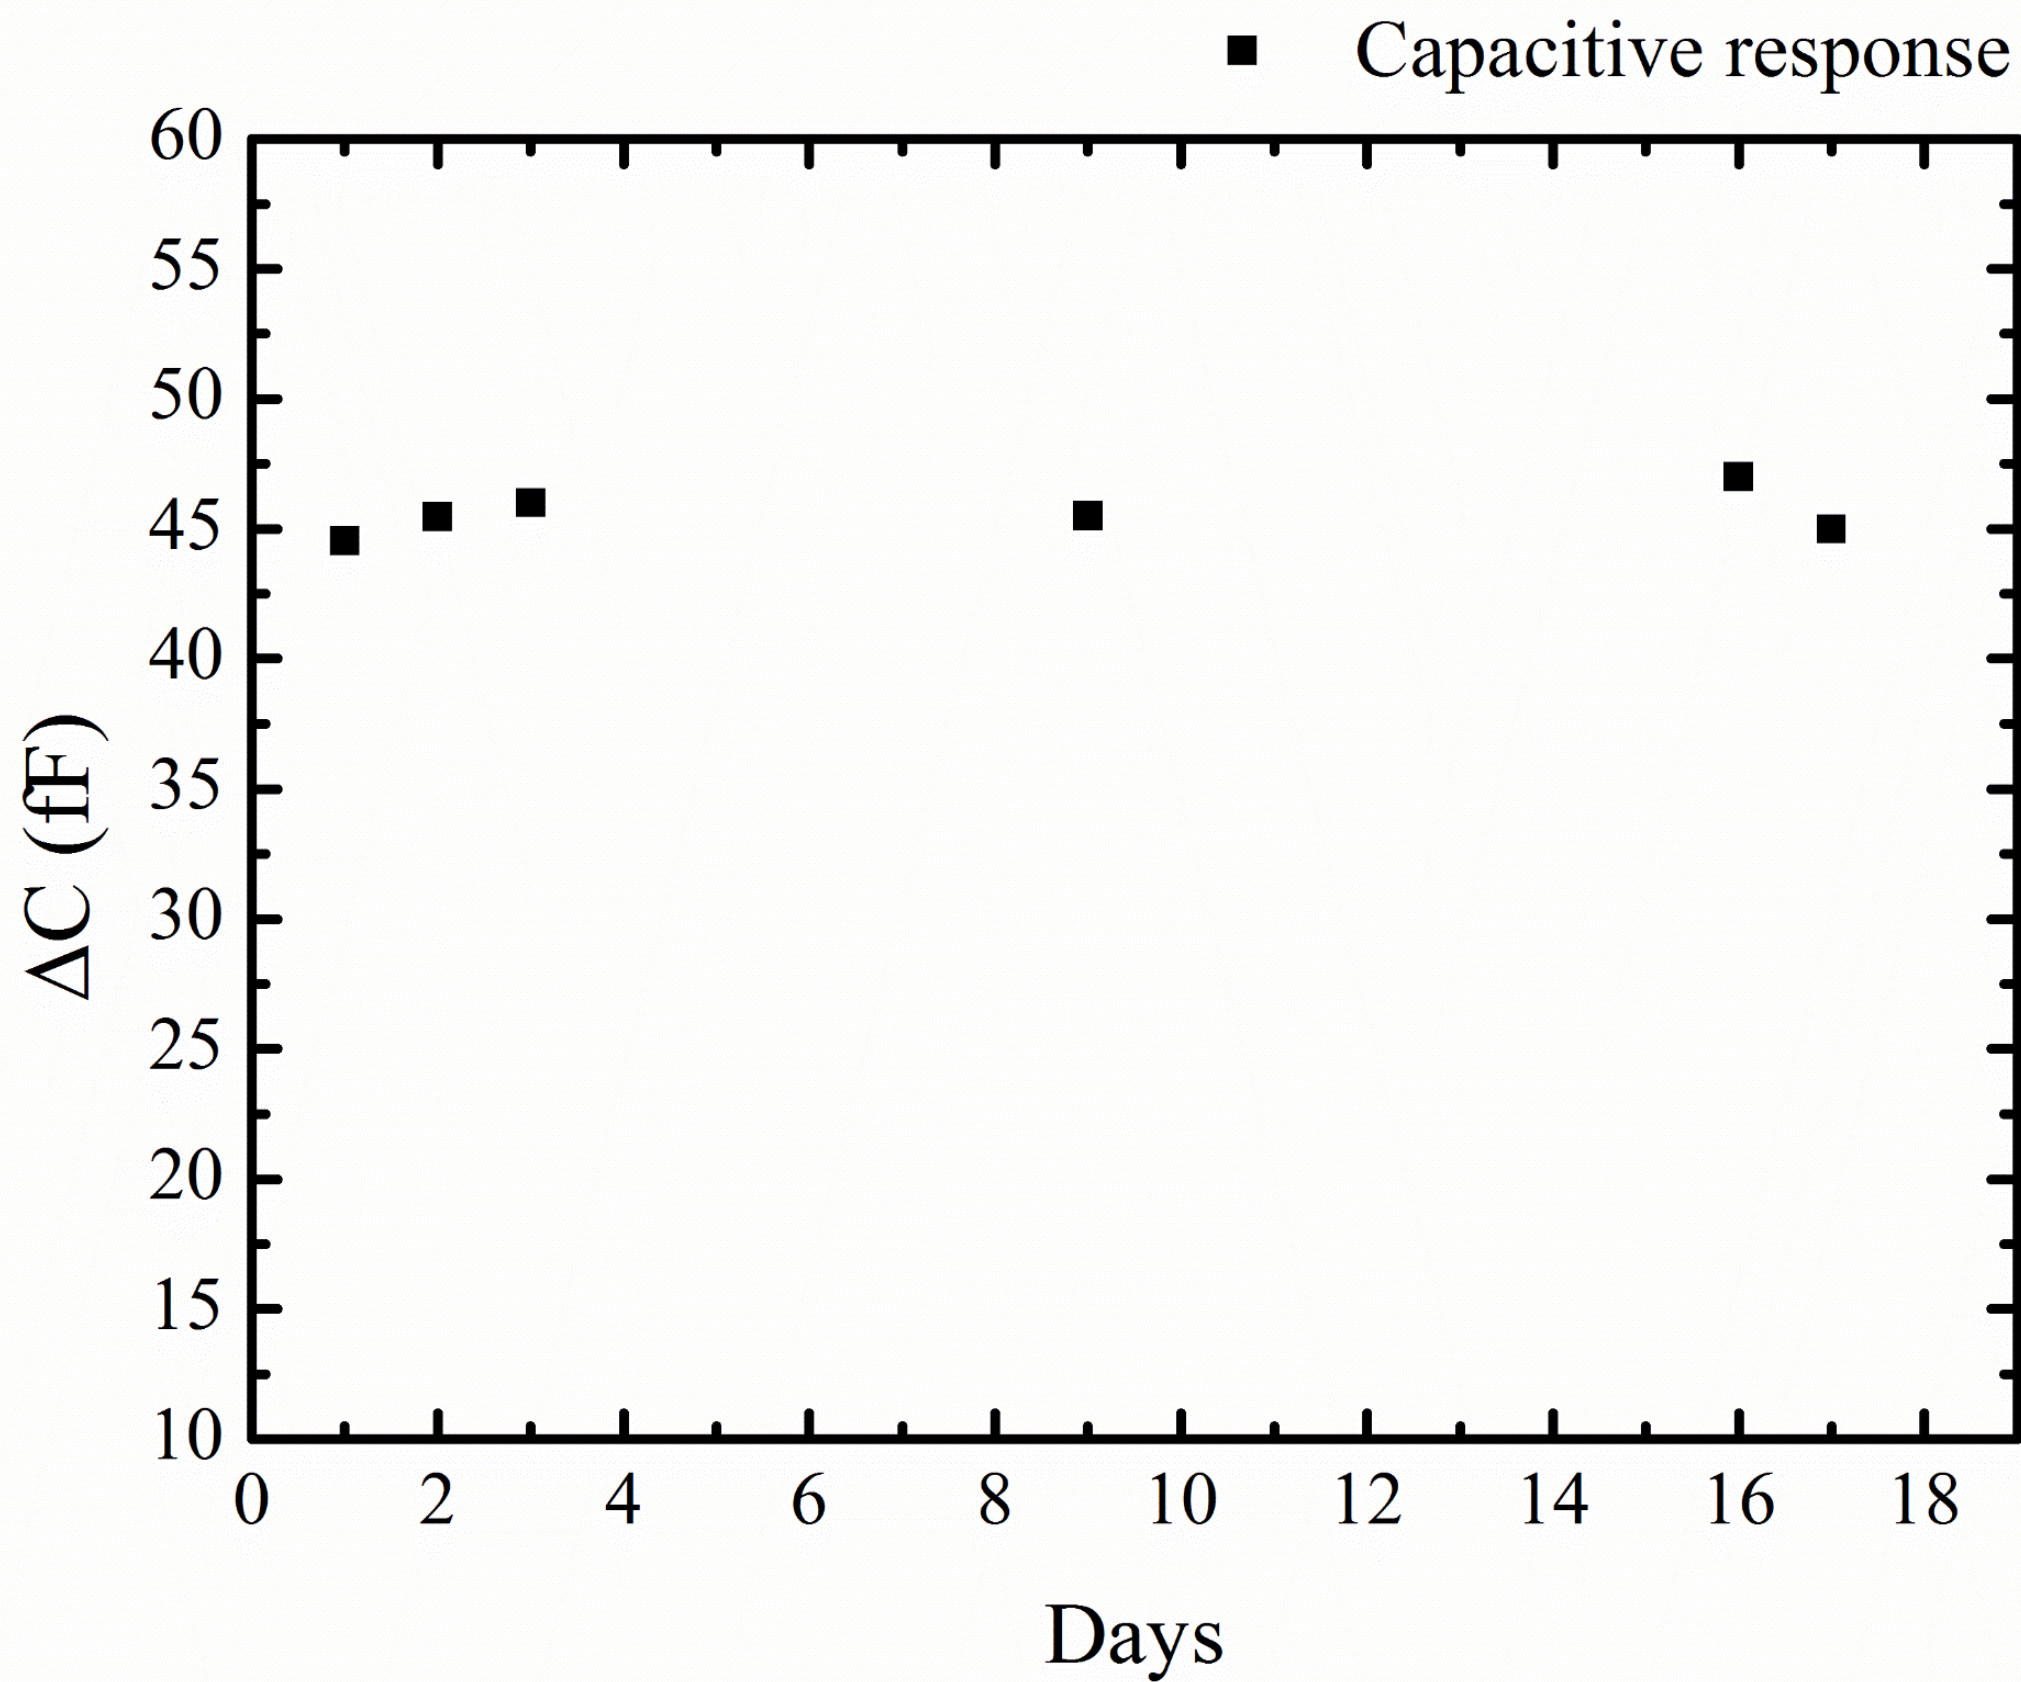

Supplement: s1 [file s1]

**(a)**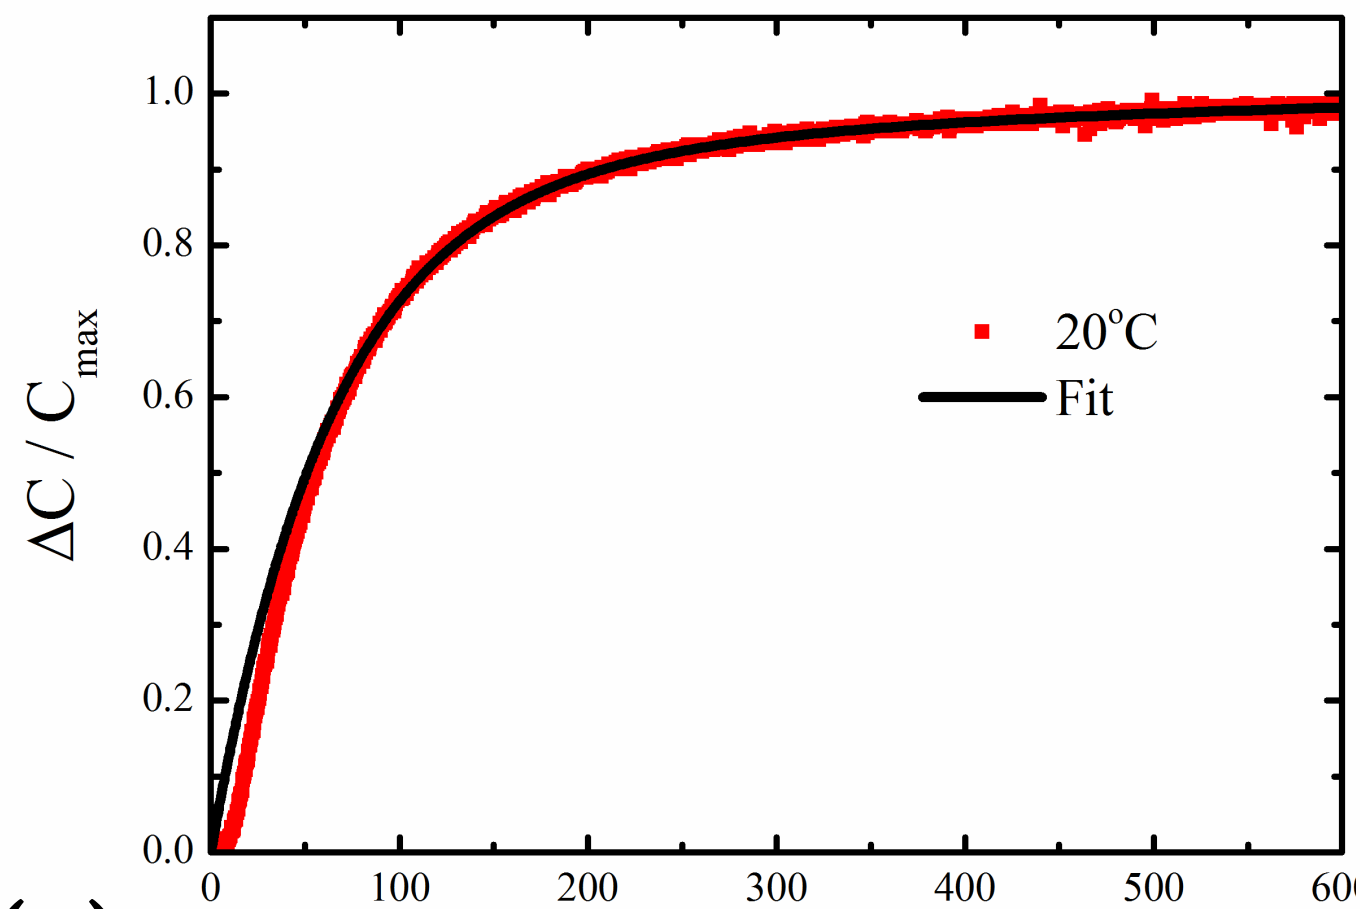**(b)**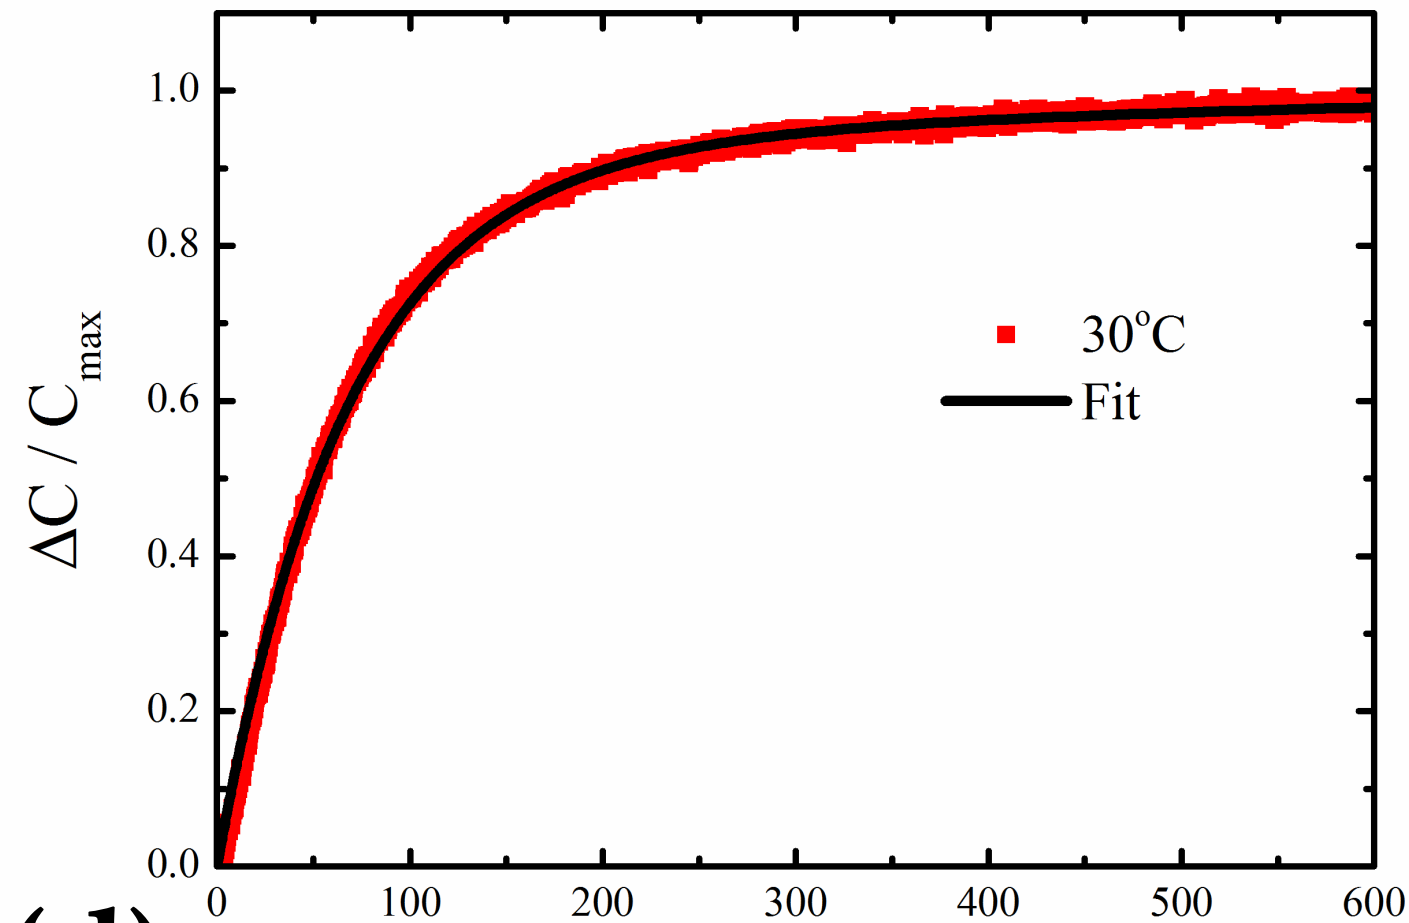**(c)**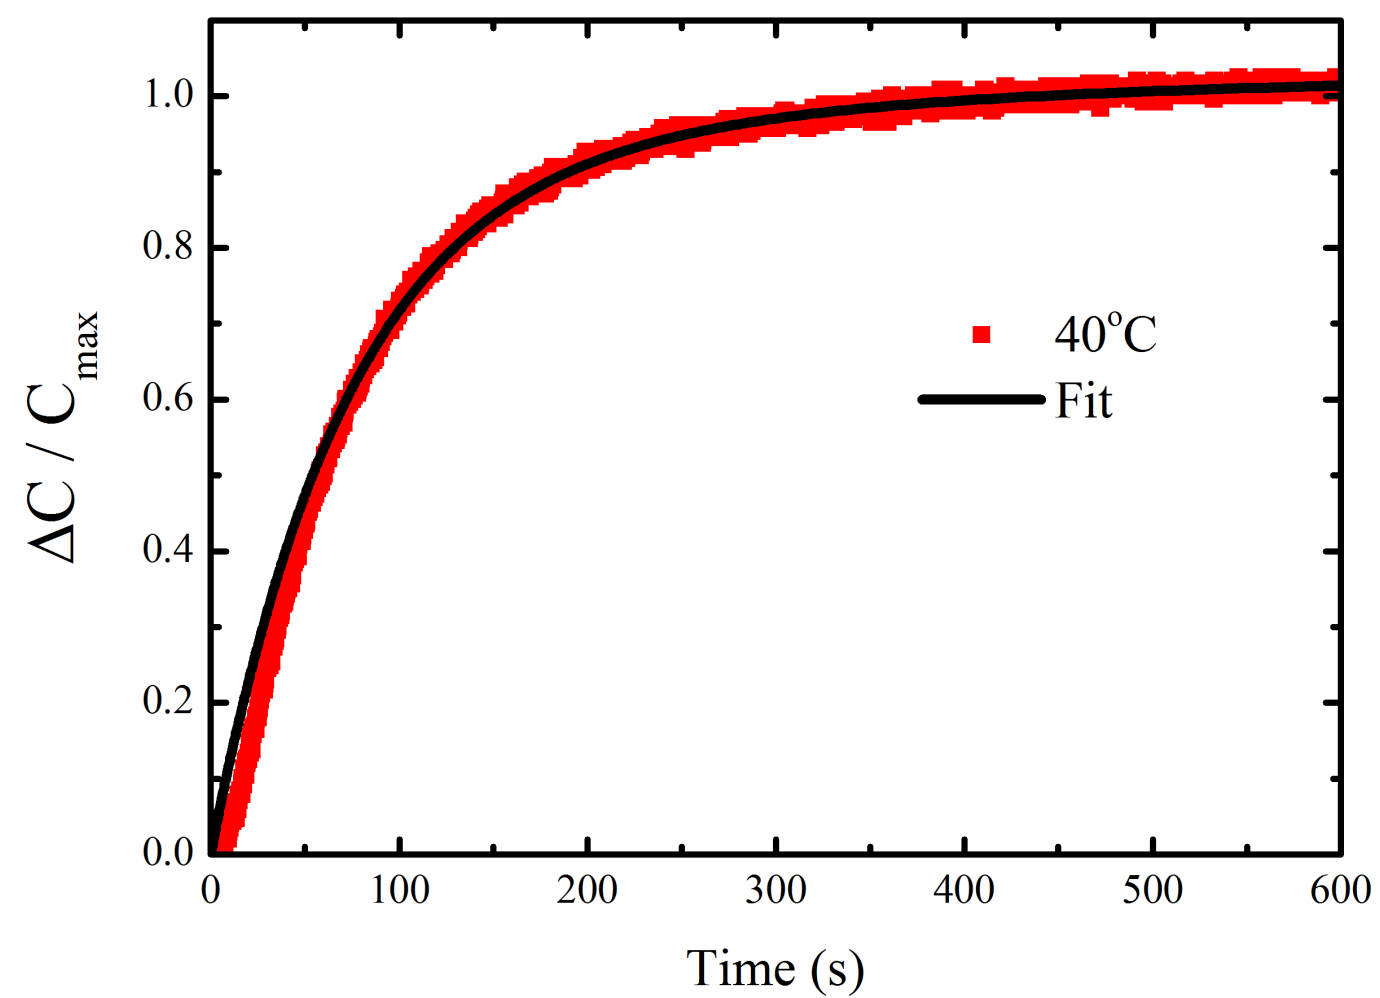**(d)**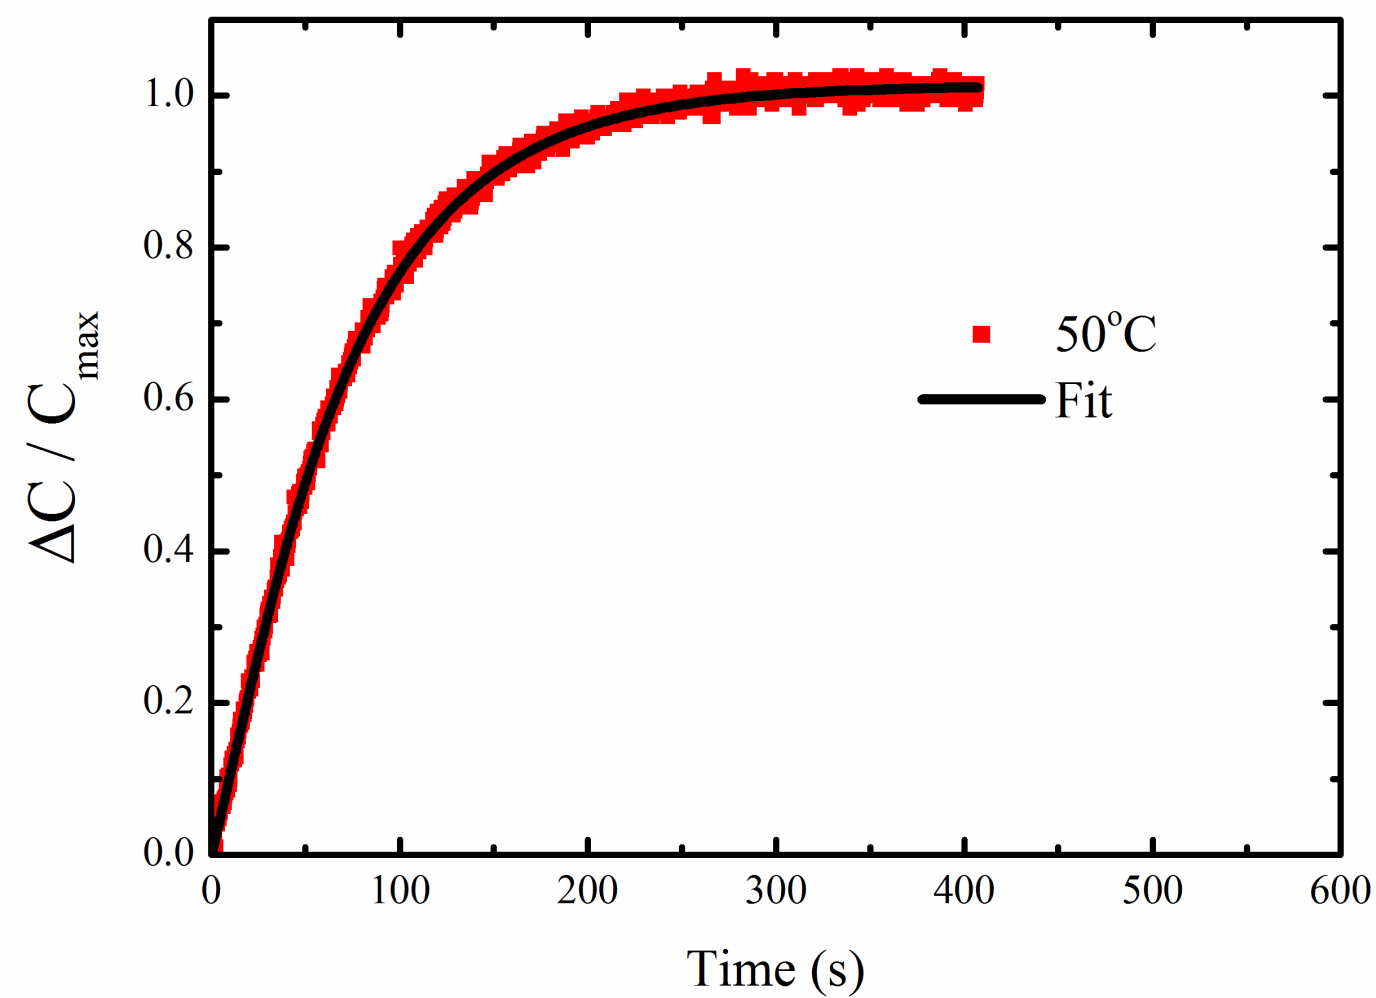

Supplement: s1 [file s1]

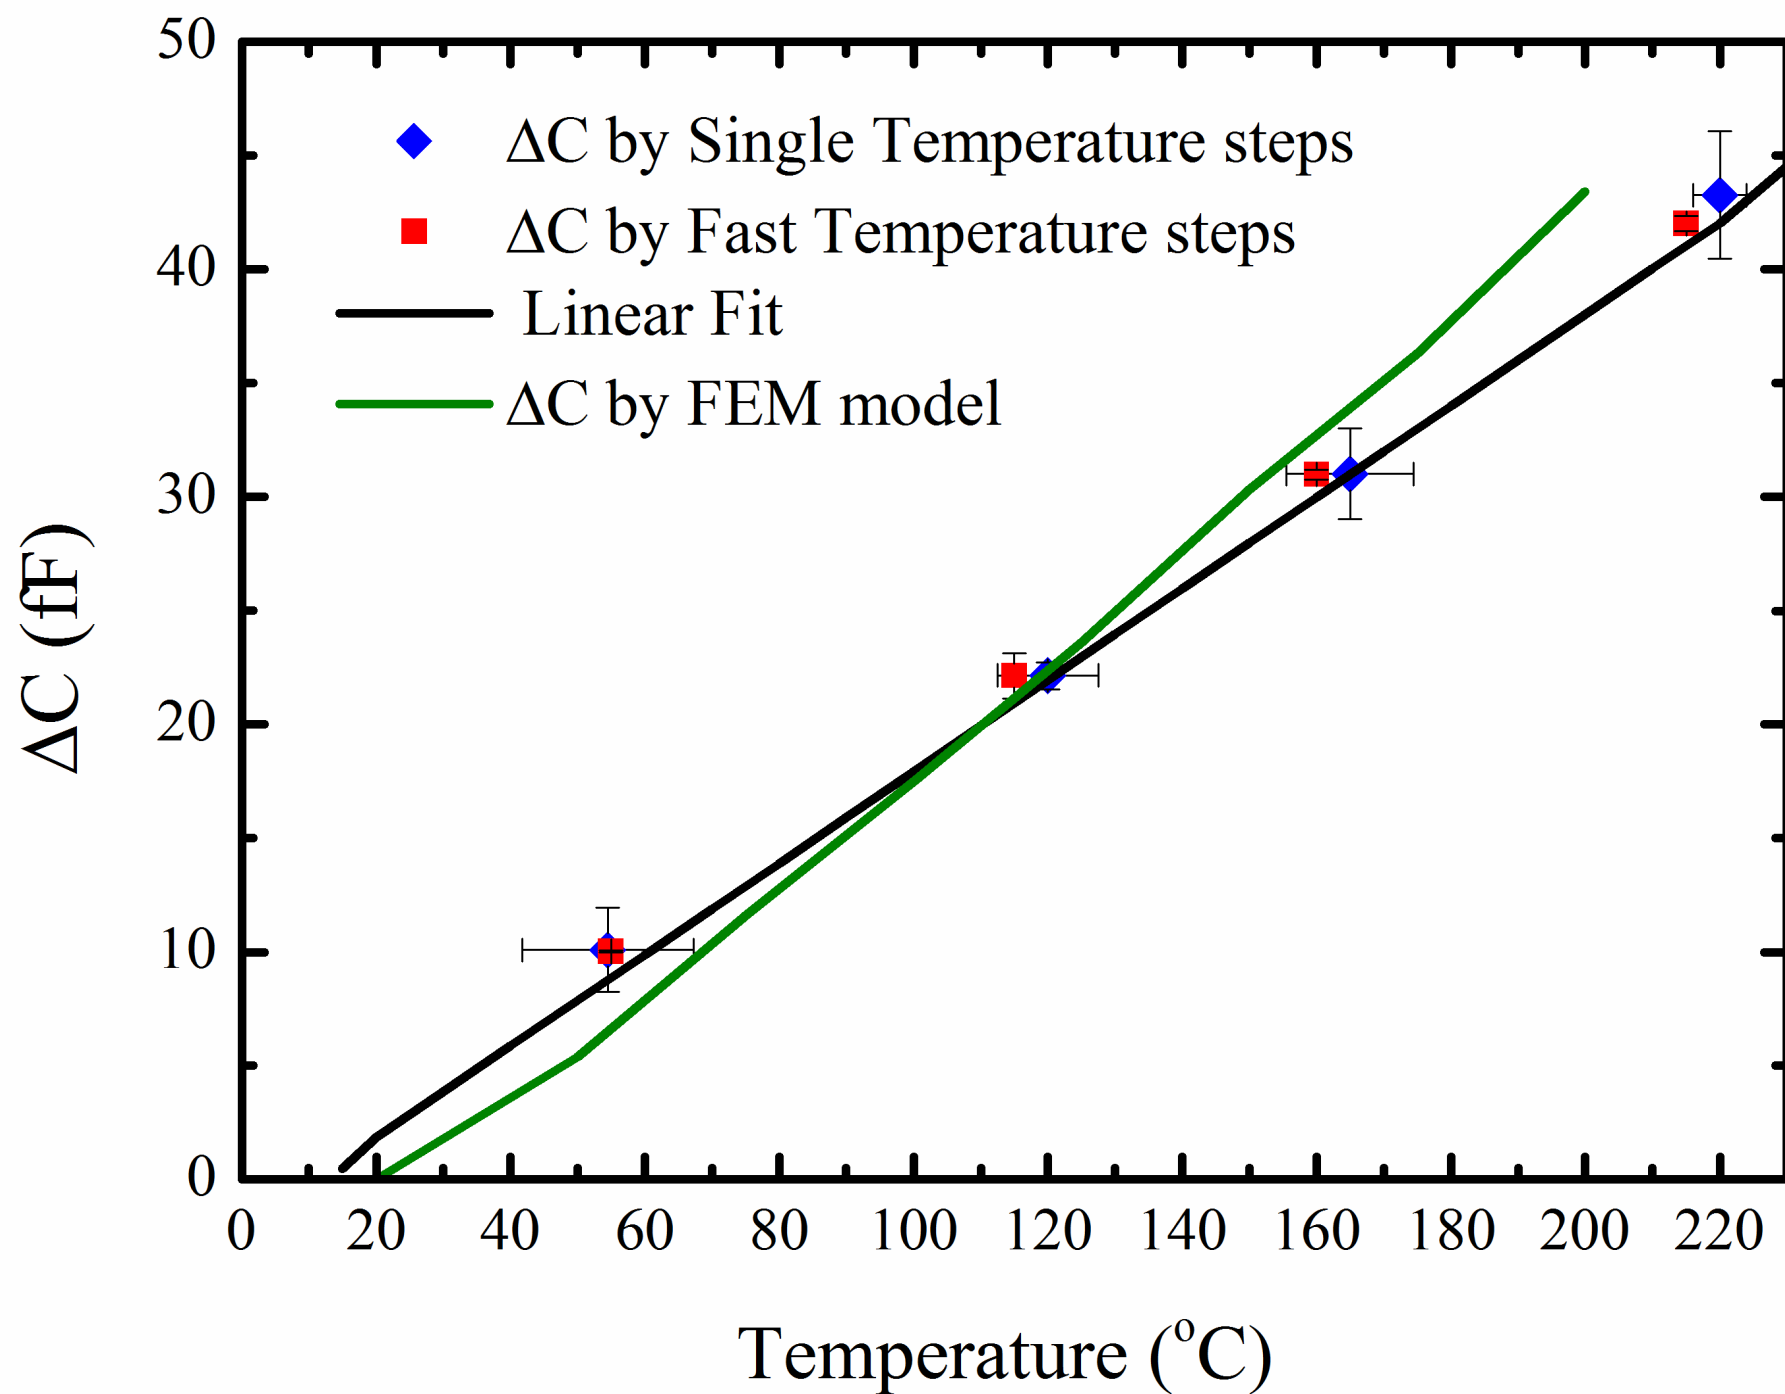

Supplement: s1 [file s1]
